# Supplementary material for: Comparative effectiveness of statins on non-high density lipoprotein cholesterol in people with diabetes and at risk of cardiovascular disease: systematic review and network meta-analysis
Source: PubMed Central journal article supplement (PMC8943592; doi:10.1136/bmj-2021-067731), 2022-03-24
Supplement: hoda067731.ww.pdf [file hoda067731.ww.pdf]

# Supplementary Appendix

## Contents

|                                                                                                                                               |    |
|-----------------------------------------------------------------------------------------------------------------------------------------------|----|
| Appendix 1: PRISMA Extension Checklist .....                                                                                                  | 3  |
| Appendix 2: Search Criteria .....                                                                                                             | 7  |
| Appendix 3: Citations of Included Studies .....                                                                                               | 10 |
| Appendix 4: Characteristics of Included Studies .....                                                                                         | 13 |
| Appendix 5: Risk of Bias Assessment .....                                                                                                     | 29 |
| Appendix 6: Deviance statistics of convergence model, Mean Posterior values by Dose and Meta-<br>Analysis of Direct (Pairwise) Evidence ..... | 33 |
| Appendix 7: Inconsistency Analysis.....                                                                                                       | 38 |
| Appendix 8: Heterogeneity Assessment .....                                                                                                    | 50 |
| Appendix 9: Secondary outcomes (TC, Discontinuations and MACE) .....                                                                          | 55 |
| Appendix 10: Treatment Ranking using SUCRA.....                                                                                               | 63 |
| Appendix 11: CINeMA Assessment .....                                                                                                          | 68 |
| Appendix 12: Comparison-Adjusted Funnel Plots .....                                                                                           | 79 |
| Appendix 13: Sensitivity Analysis of Network Model by Dose.....                                                                               | 81 |
| Appendix 14: Further Results for the Subgroup Analysis.....                                                                                   | 92 |

## Appendix 1: PRISMA Extension Checklist

### PRISMA NMA Checklist of Items to Include When Reporting A Systematic Review Involving a Network Meta-analysis

| Section/Topic             | Item # | Checklist Item                                                                                                                                                                                                                                                                                                                                                                                                                                                                                                                                                                                                                                                                                                                                                                          | Reported on Page # |
|---------------------------|--------|-----------------------------------------------------------------------------------------------------------------------------------------------------------------------------------------------------------------------------------------------------------------------------------------------------------------------------------------------------------------------------------------------------------------------------------------------------------------------------------------------------------------------------------------------------------------------------------------------------------------------------------------------------------------------------------------------------------------------------------------------------------------------------------------|--------------------|
| <b>TITLE</b>              |        |                                                                                                                                                                                                                                                                                                                                                                                                                                                                                                                                                                                                                                                                                                                                                                                         |                    |
| Title                     | 1      | Identify the report as a systematic review <i>incorporating a network meta-analysis (or related form of meta-analysis)</i> .                                                                                                                                                                                                                                                                                                                                                                                                                                                                                                                                                                                                                                                            | 1                  |
| <b>ABSTRACT</b>           |        |                                                                                                                                                                                                                                                                                                                                                                                                                                                                                                                                                                                                                                                                                                                                                                                         |                    |
| Structured summary        | 2      | Provide a structured summary including, as applicable:<br><b>Background:</b> main objectives<br><b>Methods:</b> data sources; study eligibility criteria, participants, and interventions; study appraisal; and <i>synthesis methods, such as network meta-analysis</i> .<br><b>Results:</b> number of studies and participants identified; summary estimates with corresponding confidence/credible intervals; <i>treatment rankings may also be discussed. Authors may choose to summarize pairwise comparisons against a chosen treatment included in their analyses for brevity.</i><br><b>Discussion/Conclusions:</b> limitations; conclusions and implications of findings.<br><b>Other:</b> primary source of funding; systematic review registration number with registry name. | 2                  |
| <b>INTRODUCTION</b>       |        |                                                                                                                                                                                                                                                                                                                                                                                                                                                                                                                                                                                                                                                                                                                                                                                         |                    |
| Rationale                 | 3      | Describe the rationale for the review in the context of what is already known, <i>including mention of why a network meta-analysis has been conducted</i> .                                                                                                                                                                                                                                                                                                                                                                                                                                                                                                                                                                                                                             | 3                  |
| Objectives                | 4      | Provide an explicit statement of questions being addressed, with reference to participants, interventions, comparisons, outcomes, and study design (PICOS).                                                                                                                                                                                                                                                                                                                                                                                                                                                                                                                                                                                                                             | 4                  |
| <b>METHODS</b>            |        |                                                                                                                                                                                                                                                                                                                                                                                                                                                                                                                                                                                                                                                                                                                                                                                         |                    |
| Protocol and registration | 5      | Indicate whether a review protocol exists and if and where it can be accessed (e.g., Web address); and, if available, provide registration information, including registration number.                                                                                                                                                                                                                                                                                                                                                                                                                                                                                                                                                                                                  | 4                  |
| Eligibility criteria      | 6      | Specify study characteristics (e.g., PICOS, length of follow-up) and report characteristics (e.g., years considered, language, publication status) used as criteria for eligibility, giving rationale. <i>Clearly describe eligible treatments included in the treatment network and note whether any have been clustered or merged into the same node (with justification)</i> .                                                                                                                                                                                                                                                                                                                                                                                                       | 4-5                |
| Information sources       | 7      | Describe all information sources (e.g., databases with dates of coverage, contact with study authors to identify additional studies) in the search and date last searched.                                                                                                                                                                                                                                                                                                                                                                                                                                                                                                                                                                                                              | 4                  |
| Search                    | 8      | Present full electronic search strategy for at least one                                                                                                                                                                                                                                                                                                                                                                                                                                                                                                                                                                                                                                                                                                                                | 4                  |

|                                        |           |                                                                                                                                                                                                                                                                                                                                                                                                                                                   |     |
|----------------------------------------|-----------|---------------------------------------------------------------------------------------------------------------------------------------------------------------------------------------------------------------------------------------------------------------------------------------------------------------------------------------------------------------------------------------------------------------------------------------------------|-----|
|                                        |           | database, including any limits used, such that it could be repeated.                                                                                                                                                                                                                                                                                                                                                                              |     |
| Study selection                        | 9         | State the process for selecting studies (i.e., screening, eligibility, included in systematic review, and, if applicable, included in the meta-analysis).                                                                                                                                                                                                                                                                                         | 4   |
| Data collection process                | 10        | Describe method of data extraction from reports (e.g., piloted forms, independently, in duplicate) and any processes for obtaining and confirming data from investigators.                                                                                                                                                                                                                                                                        | 5   |
| Data items                             | 11        | List and define all variables for which data were sought (e.g., PICOS, funding sources) and any assumptions and simplifications made.                                                                                                                                                                                                                                                                                                             | 5   |
| <b>Geometry of the network</b>         | <b>S1</b> | Describe methods used to explore the geometry of the treatment network under study and potential biases related to it. This should include how the evidence base has been graphically summarized for presentation, and what characteristics were compiled and used to describe the evidence base to readers.                                                                                                                                      | 5-6 |
| Risk of bias within individual studies | 12        | Describe methods used for assessing risk of bias of individual studies (including specification of whether this was done at the study or outcome level), and how this information is to be used in any data synthesis.                                                                                                                                                                                                                            | 5-6 |
| Summary measures                       | 13        | State the principal summary measures (e.g., risk ratio, difference in means). <i>Also describe the use of additional summary measures assessed, such as treatment rankings and surface under the cumulative ranking curve (SUCRA) values, as well as modified approaches used to present summary findings from meta-analyses.</i>                                                                                                                 | 6   |
| Planned methods of analysis            | 14        | Describe the methods of handling data and combining results of studies for each network meta-analysis. This should include, but not be limited to: <ul style="list-style-type: none"> <li>• <i>Handling of multi-arm trials.</i></li> <li>• <i>Selection of variance structure.</i></li> <li>• <i>Selection of prior distributions in Bayesian analyses; and</i></li> <li>• <i>Assessment of model fit.</i></li> </ul>                            | 6-7 |
| <b>Assessment of Inconsistency</b>     | <b>S2</b> | Describe the statistical methods used to evaluate the agreement of direct and indirect evidence in the treatment network(s) studied. Describe efforts taken to address its presence when found.                                                                                                                                                                                                                                                   | 6   |
| Risk of bias across studies            | 15        | Specify any assessment of risk of bias that may affect the cumulative evidence (e.g., publication bias, selective reporting within studies).                                                                                                                                                                                                                                                                                                      | 5-6 |
| Additional analyses                    | 16        | Describe methods of additional analyses if done, indicating which were pre-specified. This may include, but not be limited to, the following: <ul style="list-style-type: none"> <li>• Sensitivity or subgroup analyses.</li> <li>• Meta-regression analyses.</li> <li>• <i>Alternative formulations of the treatment network; and</i></li> <li>• <i>Use of alternative prior distributions for Bayesian analyses (if applicable).</i></li> </ul> | 6-7 |

## RESULTS†

|                                          |           |                                                                                                                                                                                                                                                                                                                                                                                                                                                               |      |
|------------------------------------------|-----------|---------------------------------------------------------------------------------------------------------------------------------------------------------------------------------------------------------------------------------------------------------------------------------------------------------------------------------------------------------------------------------------------------------------------------------------------------------------|------|
| Study selection                          | 17        | Give numbers of studies screened, assessed for eligibility, and included in the review, with reasons for exclusions at each stage, ideally with a flow diagram.                                                                                                                                                                                                                                                                                               | 7    |
| <b>Presentation of network structure</b> | <b>S3</b> | Provide a network graph of the included studies to enable visualization of the geometry of the treatment network.                                                                                                                                                                                                                                                                                                                                             | 8    |
| <b>Summary of network geometry</b>       | <b>S4</b> | Provide a brief overview of characteristics of the treatment network. This may include commentary on the abundance of trials and randomized patients for the different interventions and pairwise comparisons in the network, gaps of evidence in the treatment network, and potential biases reflected by the network structure.                                                                                                                             | 8    |
| Study characteristics                    | 18        | For each study, present characteristics for which data were extracted (e.g., study size, PICOS, follow-up period) and provide the citations.                                                                                                                                                                                                                                                                                                                  | 7-8  |
| Risk of bias within studies              | 19        | Present data on risk of bias of each study and, if available, any outcome level assessment.                                                                                                                                                                                                                                                                                                                                                                   | 8    |
| Results of individual studies            | 20        | For all outcomes considered (benefits or harms), present, for each study: 1) simple summary data for each intervention group, and 2) effect estimates and confidence intervals. <i>Modified approaches may be needed to deal with information from larger networks.</i>                                                                                                                                                                                       | 8    |
| Synthesis of results                     | 21        | Present results of each meta-analysis done, including confidence/credible intervals. <i>In larger networks, authors may focus on comparisons versus a particular comparator (e.g., placebo or standard care), with full findings presented in an appendix. League tables and forest plots may be considered to summarize pairwise comparisons.</i> If additional summary measures were explored (such as treatment rankings), these should also be presented. | 9-10 |
| <b>Exploration for inconsistency</b>     | <b>S5</b> | Describe results from investigations of inconsistency. This may include such information as measures of model fit to compare consistency and inconsistency models, <i>P</i> values from statistical tests, or summary of inconsistency estimates from different parts of the treatment network.                                                                                                                                                               | 8    |
| Risk of bias across studies              | 22        | Present results of any assessment of risk of bias across studies for the evidence base being studied.                                                                                                                                                                                                                                                                                                                                                         | 9    |
| Results of additional analyses           | 23        | Give results of additional analyses, if done (e.g., sensitivity or subgroup analyses, meta-regression analyses, <i>alternative network geometries studied, alternative choice of prior distributions for Bayesian analyses, and so forth</i> ).                                                                                                                                                                                                               | 9    |
| <b>DISCUSSION</b>                        |           |                                                                                                                                                                                                                                                                                                                                                                                                                                                               |      |
| Summary of evidence                      | 24        | Summarize the main findings, including the strength of evidence for each main outcome; consider their relevance to key groups (e.g., healthcare providers, users, and policymakers).                                                                                                                                                                                                                                                                          | 10   |

|                |    |                                                                                                                                                                                                                                                                                                                                                                                                                                |       |
|----------------|----|--------------------------------------------------------------------------------------------------------------------------------------------------------------------------------------------------------------------------------------------------------------------------------------------------------------------------------------------------------------------------------------------------------------------------------|-------|
| Limitations    | 25 | Discuss limitations at study and outcome level (e.g., risk of bias), and at review level (e.g., incomplete retrieval of identified research, reporting bias). <i>Comment on the validity of the assumptions, such as transitivity and consistency. Comment on any concerns regarding network geometry (e.g., avoidance of certain comparisons).</i>                                                                            | 11-12 |
| Conclusions    | 26 | Provide a general interpretation of the results in the context of other evidence, and implications for future research.                                                                                                                                                                                                                                                                                                        | 13    |
| <b>FUNDING</b> |    |                                                                                                                                                                                                                                                                                                                                                                                                                                |       |
| Funding        | 27 | Describe sources of funding for the systematic review and other support (e.g., supply of data), role of funders for the systematic review. This should also include information regarding whether funding has been received from manufacturers of treatments in the network and/or whether some of the authors are content experts with professional conflicts of interest that could affect use of treatments in the network. | 14    |

PICOS = population, intervention, comparators, outcomes, study design.

\* Text in italics indicates wording specific to reporting of network meta-analyses that has been added to guidance from the PRISMA statement.

† Authors may wish to plan for use of appendices to present all relevant information in full detail for items in this section.

## Appendix 2: Search Criteria

### Ovid Medline (1946 to December 2021)

| #         | Terms                                                                                                                                                                                                                                                                                                                | Number of Citations |
|-----------|----------------------------------------------------------------------------------------------------------------------------------------------------------------------------------------------------------------------------------------------------------------------------------------------------------------------|---------------------|
| 1         | exp Hydroxymethylglutaryl-CoA Reductase Inhibitors/                                                                                                                                                                                                                                                                  | 42548               |
| 2         | (atorvastatin or fluvastatin or lovastatin or pitavastatin or pravastatin or rosuvastatin or simvastatin).mp.                                                                                                                                                                                                        | 27663               |
| 3         | (lipitor or lescol or mevacor or livalo or pravachol or crestor or zocor).mp.                                                                                                                                                                                                                                        | 483                 |
| 4         | 2 or 3                                                                                                                                                                                                                                                                                                               | 27723               |
| 5         | 1 or 4                                                                                                                                                                                                                                                                                                               | 46309               |
| 6         | Diabetes Mellitus, Type 1/ or Diabetes Mellitus, Type 2/ or diabetes.mp. or Diabetes Mellitus/                                                                                                                                                                                                                       | 582109              |
| 7         | Cholesterol, LDL/                                                                                                                                                                                                                                                                                                    | 28703               |
| 8         | (LDL cholesterol or LDL-c).mp.                                                                                                                                                                                                                                                                                       | 36486               |
| 9         | 7 or 8                                                                                                                                                                                                                                                                                                               | 50434               |
| 10        | 5 and 6 and 9                                                                                                                                                                                                                                                                                                        | 1620                |
| 11        | limit 10 to (clinical trial, all or clinical trial or comparative study or controlled clinical trial or randomized controlled trial)                                                                                                                                                                                 | 579                 |
| 12        | randomized controlled trial.pt.                                                                                                                                                                                                                                                                                      | 536101              |
| 13        | controlled clinical trial.pt.                                                                                                                                                                                                                                                                                        | 94244               |
| 14        | randomized.mp. or randomised.tw. [mp=title, abstract, original title, name of substance word, subject heading word, floating sub-heading word, keyword heading word, organism supplementary concept word, protocol supplementary concept word, rare disease supplementary concept word, unique identifier, synonyms] | 852433              |
| 15        | placebo.tw.                                                                                                                                                                                                                                                                                                          | 203787              |
| 16        | randomly.ab.                                                                                                                                                                                                                                                                                                         | 305428              |
| 17        | trial.tw.                                                                                                                                                                                                                                                                                                            | 559657              |
| 18        | or/12-17                                                                                                                                                                                                                                                                                                             | 1360407             |
| 19        | 10 and 18                                                                                                                                                                                                                                                                                                            | 736                 |
| <b>20</b> | <b>11 or 19</b>                                                                                                                                                                                                                                                                                                      | <b>859</b>          |

**Cochrane Central Register of Controlled Trials (December 2021)**

| #         | Terms                                                                                                         | Number of Citations |
|-----------|---------------------------------------------------------------------------------------------------------------|---------------------|
| 1         | exp Hydroxymethylglutaryl-CoA Reductase Inhibitors/                                                           | 5452                |
| 2         | (atorvastatin or fluvastatin or lovastatin or pitavastatin or pravastatin or rosuvastatin or simvastatin).mp. | 13170               |
| 3         | (lipitor or lescol or mevacor or livalo or pravachol or crestor or zocor).mp.                                 | 442                 |
| 4         | 2 or 3                                                                                                        | 13209               |
| 5         | 1 or 4                                                                                                        | 13996               |
| 6         | Diabetes Mellitus, Type 1/ or Diabetes Mellitus, Type 2/ or diabetes.mp. or Diabetes Mellitus/                | 90730               |
| 7         | Cholesterol, LDL/                                                                                             | 4817                |
| 8         | (LDL cholesterol or LDL-c).mp.                                                                                | 14605               |
| 9         | 7 or 8                                                                                                        | 16445               |
| <b>10</b> | <b>5 and 6 and 9</b>                                                                                          | <b>846</b>          |



**Embase (1974 to December 2021)**

| #         | Terms                                                                                                         | Number of Citations |
|-----------|---------------------------------------------------------------------------------------------------------------|---------------------|
| 1         | exp Hydroxymethylglutaryl-CoA Reductase Inhibitors/                                                           | 165145              |
| 2         | (atorvastatin or fluvastatin or lovastatin or pitavastatin or pravastatin or rosuvastatin or simvastatin).mp. | 85264               |
| 3         | (lipitor or lescol or mevacor or livalo or pravachol or crestor or zocor).mp.                                 | 4993                |
| 4         | 2 or 3                                                                                                        | 85546               |
| 5         | 1 or 4                                                                                                        | 166665              |
| 6         | Diabetes Mellitus, Type 1/ or Diabetes Mellitus, Type 2/ or diabetes.mp. or Diabetes Mellitus/                | 1131277             |
| 7         | Cholesterol, LDL/                                                                                             | 97478               |
| 8         | (LDL cholesterol or LDL-c).mp.                                                                                | 65092               |
| 9         | 7 or 8                                                                                                        | 119985              |
| 10        | 5 and 6 and 9                                                                                                 | 8401                |
| 11        | (random* or factorial* or placebo* or assign* or allocat* or crossover*).tw.                                  | 2168848             |
| 12        | (trial* and (control* or comparative)).tw.                                                                    | 691381              |
| 13        | ((blind* or mask*) and (single or double or triple or treble)).tw.                                            | 285963              |
| 14        | (treatment adj arm*).tw.                                                                                      | 22367               |
| 15        | (control* adj group*).tw.                                                                                     | 716627              |
| 16        | rct.tw.                                                                                                       | 42525               |
| 17        | DOUBLE BLIND PROCEDURE/                                                                                       | 185363              |
| 18        | SINGLE BLIND PROCEDURE/                                                                                       | 43054               |
| 19        | RANDOMIZATION/                                                                                                | 91106               |
| 20        | PLACEBO/                                                                                                      | 368040              |
| 21        | exp Clinical Trial/                                                                                           | 1606640             |
| 22        | or/11-21                                                                                                      | 3799216             |
| <b>23</b> | <b>10 and 22</b>                                                                                              | <b>1579</b>         |

## Appendix 3: Citations of Included Studies

### Citations for the 42 eligible studies:

1. Visseren, F. , Bouter, P. , van Loon, B. , Erkelens, W. & (2001). Treatment of Dyslipidaemia with Fluvastatin in Patients with Type 2 Diabetes Mellitus. *Clinical Drug Investigation*, 21 (10), 671-678.
2. The effect of aggressive versus standard lipid lowering by atorvastatin on diabetic dyslipidemia: the DALI study: a double-blind, randomized, placebo-controlled trial in patients with type 2 diabetes and diabetic dyslipidemia. *Diabetes Care* 2001; **24**(8): 1335-41.
3. Behounek BD, MCGovern ME, Kassler-Taub KB, Markowitz SJ, Bergman M, DIABETES TPMSGF. A multinational study of the effects of low-dose pravastatin in patients with non-insulin-dependent diabetes mellitus and hypercholesterolemia. *Clinical Cardiology* 1994; **17**(10): 558-62.
4. Berberoglu Z, Guvener N, Cangoz B, Asik M, Yazici AC, Karatas M. Effects of Achieving an LDL-Cholesterol Level of <70 mg/dL Compared With the Goal of <100 mg/dL Using Simvastatin or Atorvastatin on Cognitive Processes in High-Risk Diabetic Patients. *The Endocrinologist* 2009; **19**(6): 271-9.
5. Betteridge DJ, Gibson JM, Sager PT. Comparison of Effectiveness of Rosuvastatin Versus Atorvastatin on the Achievement of Combined C-Reactive Protein (<2 mg/L) and Low-Density Lipoprotein Cholesterol (<70 mg/dl) Targets in Patients With Type 2 Diabetes Mellitus (from the ANDROMEDA Study). *American Journal of Cardiology* 2007; **100**(8): 1245-8.
6. Chang YH, Lin KC, Chang DM, Hsieh CH, Lee YJ. Paradoxical negative HDL cholesterol response to atorvastatin and simvastatin treatment in Chinese type 2 diabetic patients. *Rev Diabet Stud* 2013; **10**(2-3): 213-22.
7. Cheung RC, Morrell JM, Kallend D, Watkins C, Schuster H. Effects of switching statins on lipid and apolipoprotein ratios in the MERCURY I study. *Int J Cardiol* 2005; **100**(2): 309-16.
8. Chu CH, Lee JK, Lam HC, et al. Atorvastatin does not affect insulin sensitivity and the adiponectin or leptin levels in hyperlipidemic Type 2 diabetes. *J Endocrinol Invest* 2008; **31**(1): 42-7.
9. Colhoun HM, Betteridge DJ, Durrington PN, et al. Primary prevention of cardiovascular disease with atorvastatin in type 2 diabetes in the Collaborative Atorvastatin Diabetes Study (CARDS): multicentre randomised placebo-controlled trial. *Lancet* 2004; **364**(9435): 685-96.
10. Dalla Nora E, Passaro A, Zamboni PF, Calzoni F, Fellin R, Solini A. Atorvastatin improves metabolic control and endothelial function in type 2 diabetic patients: a placebo-controlled study. *J Endocrinol Invest* 2003; **26**(1): 73-8.
11. Dallinga-Thie GM, van Tol A, Dullaart RP. Plasma pre beta-HDL formation is decreased by atorvastatin treatment in type 2 diabetes mellitus: Role of phospholipid transfer protein. *Biochim Biophys Acta* 2009; **1791**(8): 714-8.
12. Ferrer-García JC, Sanchez-Ballester E, Albalat-Galera R, Berzosa-Sanchez M, Herrera-Ballester A. Efficacy of atorvastatin for achieving cholesterol targets after LDL-cholesterol based dose selection in patients with type 2 diabetes. *J Cardiovasc Pharmacol Ther* 2008; **13**(3): 183-8.
13. Gentile S, Turco S, Guarino G, et al. Comparative efficacy study of atorvastatin vs. simvastatin, pravastatin, lovastatin and placebo in type 2 diabetic patients with hypercholesterolaemia. *Diabetes, Obesity and Metabolism* 2000; **2**(6): 355-62.
14. Goldberg RB, Guyton JR, Mazzone T, et al. Ezetimibe/simvastatin vs atorvastatin in patients with type 2 diabetes mellitus and hypercholesterolemia: the VYTAL study. *Mayo Clin Proc* 2006; **81**(12): 1579-88.
15. Hadjibabaie M, Gholami K, Khalili H, et al. Comparative efficacy and safety of atorvastatin, simvastatin and lovastatin in the management of dyslipidemic Type 2 diabetic patients. *Therapy* 2006; **3**: 759-64.
16. Ichihara A, Hayashi M, Ryuzaki M, Handa M, Furukawa T, Saruta T. Fluvastatin prevents development of arterial stiffness in haemodialysis patients with type 2 diabetes mellitus. *Nephrol Dial Transplant* 2002; **17**(8): 1513-7.

17. Insull Jr W, Kafonek S, Goldner D, Zieve F. Comparison of efficacy and safety of atorvastatin (10mg) with simvastatin (10mg) at six weeks. ASSET Investigators. *The American journal of cardiology* 2001; **87**: 554-9.
18. Ishigaki Y, Kono S, Katagiri H, Oka Y, Oikawa S. Elevation of HDL-C in response to statin treatment is involved in the regression of carotid atherosclerosis. *J Atheroscler Thromb* 2014; **21**(10): 1055-65.
19. Janatuinen T, Knuuti J, Toikka JO, et al. Effect of pravastatin on low-density lipoprotein oxidation and myocardial perfusion in young adults with type 1 diabetes. *Arterioscler Thromb Vasc Biol* 2004; **24**(7): 1303-8.
20. Jialal I, Devaraj S. Statin therapy in acute cardiovascular syndromes. *Curr Opin Lipidol* 2007; **18**(5): 610-2.
21. Kim JH, Lee MR, Shin JA, et al. Effects of pravastatin on serum adiponectin levels in female patients with type 2 diabetes mellitus. *Atherosclerosis* 2013; **227**(2): 355-9.
22. Kim JM, Back MK, Yi HS, Joung KH, Kim HJ, Ku BJ. Effect of Atorvastatin on Growth Differentiation Factor-15 in Patients with Type 2 Diabetes Mellitus and Dyslipidemia. *Diabetes Metab J* 2016; **40**(1): 70-8.
23. Knopp RH, d'Emden M, Smilde JG, Pocock SJ. Efficacy and safety of atorvastatin in the prevention of cardiovascular end points in subjects with type 2 diabetes: the Atorvastatin Study for Prevention of Coronary Heart Disease Endpoints in non-insulin-dependent diabetes mellitus (ASPEN). *Diabetes Care* 2006; **29**(7): 1478-85.
24. Koh KK, Oh PC, Sakuma I, Lee Y, Han SH, Shin EK. Rosuvastatin dose-dependently improves flow-mediated dilation, but reduces adiponectin levels and insulin sensitivity in hypercholesterolemic patients. *Int J Cardiol* 2016; **223**: 488-93.
25. Koh KK, Quon MJ, Han SH, et al. Simvastatin improves flow-mediated dilation but reduces adiponectin levels and insulin sensitivity in hypercholesterolemic patients. *Diabetes Care* 2008; **31**(4): 776-82.
26. Koh KK, Quon MJ, Han SH, et al. Differential metabolic effects of pravastatin and simvastatin in hypercholesterolemic patients. *Atherosclerosis* 2009; **204**(2): 483-90.
27. Lawrence JM, Reid J, Taylor GJ, Stirling C, Reckless JP. The effect of high dose atorvastatin therapy on lipids and lipoprotein subfractions in overweight patients with type 2 diabetes. *Atherosclerosis* 2004; **174**(1): 141-9.
28. Lewin AJ, Kipnes MS, Meneghini LF, et al. Effects of simvastatin on the lipid profile and attainment of low-density lipoprotein cholesterol goals when added to thiazolidinedione therapy in patients with type 2 diabetes mellitus: A multicenter, randomized, double-blind, placebo-controlled trial. *Clin Ther* 2004; **26**(3): 379-89.
29. Liu PY, Lin LY, Lin HJ, et al. Pitavastatin and Atorvastatin double-blind randomized comparative study among high-risk patients, including those with Type 2 diabetes mellitus, in Taiwan (PAPAGO-T Study). *PLoS One* 2013; **8**(10): e76298.
30. Miller M, Dobs A, Yuan Z, Battisti WP, Borisute H, Palmisano J. Effectiveness of simvastatin therapy in raising HDL-C in patients with type 2 diabetes and low HDL-C. *Curr Med Res Opin* 2004; **20**(7): 1087-94.
31. Mori H, Okada Y, Tanaka Y. Effects of pravastatin, atorvastatin, and rosuvastatin in patients with type 2 diabetes mellitus and hypercholesterolemia. *Diabetology International* 2013; **4**(2): 117-25.
32. Paolisso G, Sgambato S, De Riu S, et al. Simvastatin reduces plasma lipid levels and improves insulin action in elderly, non-insulin dependent diabetics. *Eur J Clin Pharmacol* 1991; **40**(1): 27-31.
33. Schneider JG, von Eynatten M, Parhofer KG, et al. Atorvastatin improves diabetic dyslipidemia and increases lipoprotein lipase activity in vivo. *Atherosclerosis* 2004; **175**(2): 325-31.
34. Sever PS, Poulter NR, Dahlöf B, et al. Reduction in cardiovascular events with atorvastatin in 2,532 patients with type 2 diabetes: Anglo-Scandinavian Cardiac Outcomes Trial--lipid-lowering arm (ASCOT-LLA). *Diabetes Care* 2005; **28**(5): 1151-7.

35. Sindhu S, Singh HK, Salman MT, Fatima J, Verma VK. Effects of atorvastatin and rosuvastatin on high-sensitivity C-reactive protein and lipid profile in obese type 2 diabetes mellitus patients. *J Pharmacol Pharmacother* 2011; **2**(4): 261-5.
36. Son JW, Kim DJ, Lee CB, et al. Effects of patient-tailored atorvastatin therapy on ameliorating the levels of atherogenic lipids and inflammation beyond lowering low-density lipoprotein cholesterol in patients with type 2 diabetes. *J Diabetes Investig* 2013; **4**(5): 466-74.
37. Tekin A, Tekin G, Sezgin AT, Müderrisoğlu H. Short- and long-term effect of simvastatin therapy on the heterogeneity of cardiac repolarization in diabetic patients. *Pharmacol Res* 2008; **57**(5): 393-7.
38. Thongtang N, Piyapromdee J, Tangkittikasem N, Samaithongcharoen K, Srikanchanawat N, Sriussadaporn S. Efficacy and Safety of Switching from Low-Dose Statin to High-Intensity Statin for Primary Prevention in Type 2 Diabetes: A Randomized Controlled Trial. *Diabetes Metab Syndr Obes* 2020; **13**: 423-31.
39. Winkler K, Abletshauser C, Hoffmann MM, et al. Effect of fluvastatin slow-release on low density lipoprotein (LDL) subfractions in patients with type 2 diabetes mellitus: baseline LDL profile determines specific mode of action. *J Clin Endocrinol Metab* 2002; **87**(12): 5485-90.
40. Wolffenbuttel BH, Franken AA, Vincent HH. Cholesterol-lowering effects of rosuvastatin compared with atorvastatin in patients with type 2 diabetes -- CORALL study. *J Intern Med* 2005; **257**(6): 531-9.
41. Xu K, Han YL, Jing QM, et al. Lipid-modifying therapy in diabetic patients with high plasma non-high-density lipoprotein cholesterol after percutaneous coronary intervention. *Exp Clin Cardiol* 2007; **12**(1): 48-50.
42. Zhang A, Vertommen J, Van Gaal L, De Leeuw I. Effects of pravastatin on lipid levels, in vitro oxidizability of non-HDL lipoproteins and microalbuminuria in IDDM patients. *Diabetes Res Clin Pract* 1995; **29**(3): 189-94.

## Appendix 4: Characteristics of Included Studies

| Study, Author & Date (Country) | Statin Agent (dose mg's) *[Intensity]                          | Placebo-Controlled | Assessment times (By dose)                 | No. of patients | Mean age, SD (median, range/IQR)                                                                                              | % Male                                                                                                      | % White ethnicity      | Outcome (s)      | BMI (kg/m <sup>2</sup> ) at baseline  | Diabetes type | Years of diagnosis                                                                                                                        | Comorbidity                                                                 | Concomitant medication (other lipids lowering treatment)                                        | ⊕Patient Risk (Reason for judgement)                                                                                                                                   |
|--------------------------------|----------------------------------------------------------------|--------------------|--------------------------------------------|-----------------|-------------------------------------------------------------------------------------------------------------------------------|-------------------------------------------------------------------------------------------------------------|------------------------|------------------|---------------------------------------|---------------|-------------------------------------------------------------------------------------------------------------------------------------------|-----------------------------------------------------------------------------|-------------------------------------------------------------------------------------------------|------------------------------------------------------------------------------------------------------------------------------------------------------------------------|
| Behounek 1994 (US)             | Pravastatin (10mg) [L]                                         | Yes                | 16 weeks                                   | 325             | Mean: 58.3 (Range: 37-70) (Int)                                                                                               | 50.3% (Int)                                                                                                 | NR                     | TC; LDL-c; HDL-c | Mean weight: 74.9 (Range: 144-196) kg | Type I or II  | 1                                                                                                                                         | Non-insulin-dependent diabetes mellitus and hypercholesterolemia            | NR                                                                                              | <b>Low</b> (excl. previous cardiovascular disease patient)                                                                                                             |
| Berberoglu 2009 (Turkey)       | Atorvastatin (10mg) [M]<br>Simvastatin (10mg) [L]              | No                 | 12 weeks                                   | 140             | S:<br>LDL<70 mg/dL: 60.8 (SD 7.1);<br>LDL<100 mg/d: 61.3 (8)<br><br>A:<br>LDL<70 mg/dL: 60 (7.8);<br>LDL<100 mg/d: 62.2 (7.5) | S: LDL<70 mg/dL: 9M/19F);<br>LDL<100 mg/d: 15M/14F<br><br>A: LDL<70 mg/dL: 10M/20F;<br>LDL<100 mg/d: 9M/18F | NR                     | TC; LDL-c; HDL-c | NR                                    | Type I or II  | S:<br>LDL<70 mg/dL: 4.4 (7.5) yrs.;<br>LDL<100 mg/d: 4.2 (4.8) yrs.<br><br>A:<br>LDL<70 mg/dL: 4.5 (7.7) yrs.;<br>LDL<100 mg/d: 4.1 (5.3) | Patients had overt CVD, or one or more major CV risk factors at recruitment | All patient were free from any lipid lowering therapy for at least 6-weeks prior to recruitment | <b>High</b> (Patient has overt CVD, or one or more major CV risk factors inc. hypertension, cigarette smoking, family history of CAD.                                  |
| Betteridge & Gibson 2007 (UK)  | Atorvastatin (10mg, 20mg) [M]<br>Rosuvastatin (10mg, 20mg) [H] | No                 | 8 weeks (10mg)<br>16 weeks (20mg)          | 509             | Total: 61.5 (SD 10.7)                                                                                                         | 61.10%                                                                                                      | NR                     | TC; LDL-c; HDL-c | NR                                    | Type II       | NR                                                                                                                                        | NR                                                                          | NR                                                                                              | <b>Low</b> (excl. a prior history of cardiovascular disease or familial hypercholesterolemia; resting diastolic or systolic blood pressure of > 95 mmHg or > 200 mmHg) |
| Chang 2013 (Taiwan)            | Atorvastatin (10mg [M], 20mg [M], 40mg [H])                    | No                 | 12 weeks (A: 10mg, 20mg, 40mg)<br>48 weeks | 1,080           | A: 60.9 (10.9); S: 61.1 (10.9)                                                                                                | A: 456F/298 M; S: 185F/141 M                                                                                | 100% Asian (Taiwanese) | TC; LDL-c; HDL-c | A: 25.5 (SD 3.5); S: 25.5 (3.9)       | Type II       | A: 9.7 (SD 6.6) yrs.; S: 9.7 (6.2) yrs.                                                                                                   | Hypertension diagnosis at recruitment                                       | Already prescribed anti-hypertensive medication at                                              | <b>High</b> (Over 56% has hypertension diagnosis at baseline)                                                                                                          |

|                                         |                                                                                                              |     |                                   |      |                                                            |                                             |                              |                             |                                                          |         |                                          |                                                                                         |                                                                                                                                              |                                                                                                                                                                                                                                                                                                   |
|-----------------------------------------|--------------------------------------------------------------------------------------------------------------|-----|-----------------------------------|------|------------------------------------------------------------|---------------------------------------------|------------------------------|-----------------------------|----------------------------------------------------------|---------|------------------------------------------|-----------------------------------------------------------------------------------------|----------------------------------------------------------------------------------------------------------------------------------------------|---------------------------------------------------------------------------------------------------------------------------------------------------------------------------------------------------------------------------------------------------------------------------------------------------|
|                                         | Simvastatin (20mg) [M]                                                                                       |     | (A: 10mg; S: 20mg)                |      |                                                            |                                             |                              |                             |                                                          |         |                                          |                                                                                         | time of enrolment. Patients who had been prescribed 10mg atorvastatin and 20mg simvastatin for at least 12 months were included in the study |                                                                                                                                                                                                                                                                                                   |
| Cheung 2005 (EU, Canada, and Australia) | Atorvastatin (10mg, 20mg) [M]<br>Pravastatin (40mg) [L]<br>Rosuvastatin (10mg) [H]<br>Simvastatin (20mg) [M] | No  | 8 weeks                           | 3140 | 62 and 63 yrs.                                             | 55% to 60% male                             | 99% White (European/western) | Non-HDL-c, TC, LDL-c, HDL-c | 28.2 to 28.9                                             | Type II | NR                                       | Patients with CAD or other atherosclerotic disease or T2D were enrolled                 | 6-week dietary lead-in period, during which all lipid lowering treatments were discontinued                                                  | <b>Medium</b> (20% 10-year risk of CAD)                                                                                                                                                                                                                                                           |
| Chu 2008 (Taiwan)                       | Atorvastatin (10mg [M], 20mg [M], 40mg [H])                                                                  | No  | 12 weeks                          | 29   | 10mg: 59.3 (12.8);<br>20mg: 58.5 (13);<br>40mg: 62.6 (9.6) | 10mg: 7F/3M;<br>20mg: 6F/4M;<br>40mg: 1F/8M | 100% Asian (Taiwanese)       | TC; LDL-c; HDL-c            | 10mg: 25.1 (1);<br>20mg: 25.9 (0.6);<br>40mg: 23.1 (1.1) | Type II | NR                                       | Hyperlipidaemia and Type 2 diabetics were recruited                                     | Patients were using oral anti-diabetic drugs prior to recruitment                                                                            | <b>Medium</b> (10mg: 3/10 hypertension; 20mg: 4/10 hypertension; 40mg: 3/9 hypertension)                                                                                                                                                                                                          |
| Colhoun 2004 (UK)                       | Atorvastatin (10mg) [M]                                                                                      | Yes | 24, 48, 96, 144, 192 weeks (10mg) | 2838 | A: 61.5 (SD 8.3) yrs.                                      | 68%                                         | 95% White (British)          | Non-HDL-c, TC, LDL-c, HDL-c | 36% > BMI 30kg/m <sup>2</sup>                            | Type II | Diagnosed at least 6 months before study | T2D diagnosed at least 6 weeks before study and history of hypertension and retinopathy | NR                                                                                                                                           | <b>High</b> (History of hypertension, defined as receiving antihypertensive treatment or having systolic blood pressure of 140 mm Hg or greater or diastolic blood pressure of 90 mm Hg or greater on at least two successive occasions; patients were ineligible if they had any past history of |

|                                     |                                                       |     |                                   |     |                                 |                   |                         |                             |                                  |         |                                |                      |                                                                                           |                                                                                                                                                                                                                                                                                                                                                                                                                                                            |
|-------------------------------------|-------------------------------------------------------|-----|-----------------------------------|-----|---------------------------------|-------------------|-------------------------|-----------------------------|----------------------------------|---------|--------------------------------|----------------------|-------------------------------------------------------------------------------------------|------------------------------------------------------------------------------------------------------------------------------------------------------------------------------------------------------------------------------------------------------------------------------------------------------------------------------------------------------------------------------------------------------------------------------------------------------------|
|                                     |                                                       |     |                                   |     |                                 |                   |                         |                             |                                  |         |                                |                      |                                                                                           | myocardial infarction, angina, coronary vascular surgery, cerebrovascular accident, or severe peripheral vascular disease)                                                                                                                                                                                                                                                                                                                                 |
| DALI Study Group 2001 (Netherlands) | Atorvastatin (10mg [M], 80mg [H])                     | Yes | 3 weeks (10mg)<br>30 weeks (80mg) | 251 | 60 (7.6) yrs.                   | >53% (Int groups) | Over 82% White European | TC; LDL-c; HDL-c            | ≥30 kg/m <sup>2</sup>            | Type II | >11 yrs. in both statin groups | NR                   | Lipid-lowering drugs were withdrawn at least 8 weeks before the start of the run-in phase | <b>Low</b> (Patients were not included in the present study if they had a history of myocardial infarction, percutaneous transluminal coronary angioplasty, coronary artery bypass grafting, proven manifest coronary artery disease, severe or unstable angina pectoris (higher than grade II of the Canadian Cardiovascular Society), clinically manifest heart failure (higher than grade II New York Heart Association), or severe cardiac arrhythmia) |
| Dallinga-Thie 2009 (Netherlands)    | Atorvastatin (80mg [H])                               | Yes | 30 weeks                          | 81  | A: 60 ± 8 years                 | A: 19F/21M        | Over 82% White European | TC; LDL-c; HDL-c            | A: 31 (SD 4.7) kg/m <sup>2</sup> | Type II | At least one year              | hypertriglyceridemia | NR                                                                                        | <b>Low</b> (Patients with an HbA1c above 10% or a history of cardiovascular disease were excluded)                                                                                                                                                                                                                                                                                                                                                         |
| Ferrer-García 2008 (Spain)          | Atorvastatin (10mg [M], 20mg [M], 40mg [M], 80mg [H]) | No  | 24 weeks                          | 202 | 61.1 (SD 9.9, Range 30-85) yrs. | 59.90%            | NR                      | Non-HDL-c, TC, LDL-c, HDL-c | 30.1 (SD 4.9) kg/m <sup>2</sup>  | Type II | 14.5 (SD 12.8) yrs.            | NR                   | All were statin-naïve with LDL-C levels in excess of 2.6 mmol/L after 6 to 12 weeks       | <b>Medium</b> (54.4% hypertension, 48% family history of T2Ds, 50% retinopathy)                                                                                                                                                                                                                                                                                                                                                                            |

|                           |                                                                         |     |          |      |                             |                              |                                                                                 |                             |                                 |         |                               |                                                                                                                                                                                                                                                                                                                                                         |                                                                                                                                                                                                                                                                               |                                                                                                                                                                                                                        |
|---------------------------|-------------------------------------------------------------------------|-----|----------|------|-----------------------------|------------------------------|---------------------------------------------------------------------------------|-----------------------------|---------------------------------|---------|-------------------------------|---------------------------------------------------------------------------------------------------------------------------------------------------------------------------------------------------------------------------------------------------------------------------------------------------------------------------------------------------------|-------------------------------------------------------------------------------------------------------------------------------------------------------------------------------------------------------------------------------------------------------------------------------|------------------------------------------------------------------------------------------------------------------------------------------------------------------------------------------------------------------------|
|                           |                                                                         |     |          |      |                             |                              |                                                                                 |                             |                                 |         |                               | of dietary therapy                                                                                                                                                                                                                                                                                                                                      |                                                                                                                                                                                                                                                                               |                                                                                                                                                                                                                        |
| Gentile 2000 (Italy)      | Atorvastatin (10mg) [M], Pravastatin (20mg) [L], Simvastatin (10mg) [L] | Yes | 24 weeks | 412  | Above 57 yrs. in each group | Over 60% males in each group | NR                                                                              | TC; LDL-c; HDL-c            | Between 28-30 kg/m <sup>2</sup> | Type II | NR                            | Excluded patients include: primary hypothyroidism; nephrotic syndrome; type 1 diabetes mellitus; hepatic dysfunction; serum creatine phosphokinase levels > 3 times the upper normal; body mass index > 32 kg/m <sup>2</sup> ; uncontrolled hypertension; myocardial infarction; coronary angioplasty; coronary artery bypass graft; or established CAD | Medications known to affect lipid levels, interact with study medications, or affect clinical laboratory parameters (e.g. erythromycin, anticoagulants, isotretinoin, immunosuppressive agents, lipid-regulating drugs, systemic steroids) we're not allowed during the study | <b>Low</b> (Excluded patients with uncontrolled hypertension; myocardial infarction; coronary angioplasty; coronary artery bypass graft; or established CAD; known hypersensitivities to HMG-Cao reductase inhibitors) |
| Goldberg 2006 (US)        | Atorvastatin (10mg) [M], 20mg [M], 40mg [H]                             | No  | 6 weeks  | 1229 | All A: 59.7 (SD 10.4)       | A: 49.1%                     | A: 75.4% white (western), 10.5% black, 9.4% Hispanic American, 3.5% Asian (any) | Non-HDL-c, TC, LDL-c, HDL-c | A: 33.6 (SD 7.4)                | Type II | NR                            | 86.5% metabolic syndrome at baseline                                                                                                                                                                                                                                                                                                                    | 3-5 week washout period of current lipid-lowering medications was done before randomisation                                                                                                                                                                                   | <b>Medium</b> (100% CHD or CHD risk equiv.; 15.4% actually had CHD; 11.3% ≥ 2 CHD (10 yrs. >20%) risk factors)                                                                                                         |
| Hadjibabaie 2006 (Tehran) | Atorvastatin (10mg) [M], Simvastatin (20mg) [M]                         | No  | 12 weeks | 53   | A: 53 (9); S: 56 (6)        | A: 11%M; S: 33%M             | 100% Asian (Persian Arab)                                                       | TC; LDL-c; HDL-c            | A: 31 (5); S: 29 (2)            | Type II | A: 8 (6) yrs.; S: 11 (4) yrs. | T2D patients with hyperlipidaemia. Patients with hepatic and renal dysfunction, uncontrolled hypothyroidism, Type 1 diabetes mellitus, pregnancy and uncontrolled hypertension were excluded.                                                                                                                                                           | Patients with current use of lipid-lowering drugs were excluded at baseline                                                                                                                                                                                                   | <b>Low</b> (Patients with hepatic and renal dysfunction, uncontrolled hypothyroidism, Type 1 diabetes mellitus, pregnancy, current use of lipid-lowering drugs, women on hormone-replacement)                          |



|                           |                                                 |     |              |       |                                              |                    |                                                    |                             |                                |         |                                      |                                                                                                                                                                                   |                                                                         |                                                                                                                                                                                                                                                                                                                                                                             |
|---------------------------|-------------------------------------------------|-----|--------------|-------|----------------------------------------------|--------------------|----------------------------------------------------|-----------------------------|--------------------------------|---------|--------------------------------------|-----------------------------------------------------------------------------------------------------------------------------------------------------------------------------------|-------------------------------------------------------------------------|-----------------------------------------------------------------------------------------------------------------------------------------------------------------------------------------------------------------------------------------------------------------------------------------------------------------------------------------------------------------------------|
|                           |                                                 |     |              |       |                                              |                    |                                                    |                             |                                |         |                                      |                                                                                                                                                                                   |                                                                         | therapy and uncontrolled hypertension were excluded)                                                                                                                                                                                                                                                                                                                        |
| Ichihara 2002 (Japan)     | Fluvastatin (20mg) [L]                          | Yes | 12, 24 weeks | 22    | F: 65.8 (30)                                 | 64%                | 100% Asian (Japanese)                              | TC, HDL-c                   | F: 20.9 (0.6)                  | Type II | Between 2-3 yrs. (34.5 (5.3) months) | No clinical cardiovascular disease, secondary hyperparathyroidism or a dynamic bone disease during the 6-months preceding study randomisation                                     | Patients receiving drugs that may affect lipid metabolism were excluded | <b>Low</b> (Patients had no clinical cardiovascular disease, secondary hyperparathyroidism)                                                                                                                                                                                                                                                                                 |
| Insull 2001 (US)          | Atorvastatin (10mg) [M], Simvastatin (10mg) [L] | No  | 6 weeks      | 1,424 | A: 60.9 (Range 28-81); S: 60.1 (Range 25-82) | A: 51.8%; S: 53.3% | A: 89.3% white (western); S: 92.2% white (western) | TC, LDL-c, HDL-c            | A: 31.2; S: 30.9               | Type II | NR                                   | Mixed dyslipidaemia with or without CHD/peripheral vascular disease, and with or without type 2 diabetes                                                                          | NR                                                                      | <b>High</b> (Patients with or without CHD/peripheral vascular disease)                                                                                                                                                                                                                                                                                                      |
| Ishigaki 2013 (Japan)     | Pitavastatin (1mg) [L], Pravastatin (10mg) [L]  | No  | 144 weeks    | 123   | Pit: 59 (8.8), Pra: 60 (9.6)                 | 46%                | 100% Asian (Japanese)                              | Non-HDL-c, TC, LDL-c, HDL-c | Pit: 25.4 (4.5), Pra: 26 (3.7) | Type II | NR                                   | Stable control of hyperglycaemia patient included. Patients excluded if they had severe hypertension, a stroke or myocardial infarction event in the past 3 months, heart failure | NR                                                                      | <b>Medium</b> (Patients were excluded if they had severe hypertension (systolic blood pressure (SBP) $\geq$ 180 mmHg or diastolic BP (DBP) $\geq$ 110 mmHg) - 40% had hypertension in each group; a stroke or myocardial infarction event in the past 3 months, heart failure, or any allergy or contraindication to statin use as specified in the Japanese Pharmacopoeia) |
| Janatuinen 2004 (Finland) | Pravastatin (40mg) [L]                          | Yes | 16 weeks     | 46    | P: 30.2 (5.6)                                | 57%                | 100% White European                                | TC, LDL-c, HDL-c            | P: 24.7 (2.5)                  | Type I  | 13.4 (SD 7.7) yrs.                   | Patient had no symptoms of cardiovascular disease or asthma                                                                                                                       | Patient did not use cardiovascular medication or                        | <b>Low</b> (young patients with no symptoms of cardiovascular                                                                                                                                                                                                                                                                                                               |

|                        |                                   |     |                                       |    |                                              |             |                           |                             |                                    |         |                                                        |                                                                                                                                                                                   |                                                                                                                                                                                                                                                              |                                                                                                                                                                                                                                                                                                                                                    |
|------------------------|-----------------------------------|-----|---------------------------------------|----|----------------------------------------------|-------------|---------------------------|-----------------------------|------------------------------------|---------|--------------------------------------------------------|-----------------------------------------------------------------------------------------------------------------------------------------------------------------------------------|--------------------------------------------------------------------------------------------------------------------------------------------------------------------------------------------------------------------------------------------------------------|----------------------------------------------------------------------------------------------------------------------------------------------------------------------------------------------------------------------------------------------------------------------------------------------------------------------------------------------------|
|                        |                                   |     |                                       |    |                                              |             |                           |                             |                                    |         |                                                        |                                                                                                                                                                                   | antioxidants at recruitment                                                                                                                                                                                                                                  | disease or asthma, no use of cardiovascular medication or antioxidants, no proliferative retinopathy or previous constant microalbuminuria)                                                                                                                                                                                                        |
| Jialal 2007 (US)       | Simvastatin (20mg) [M]            | Yes | 12 weeks                              | 52 | S: 23.4 (9.1)                                | 46%         | NR                        | Non-HDL-c, TC, LDL-c, HDL-c | S: 24.9 (4)                        | Type I  | Onset <20 yrs., and on insulin therapy since diagnosis | Type I diabetic patients without clinical macrovascular complications recruited at baseline                                                                                       | NR                                                                                                                                                                                                                                                           | <b>Low</b> (unclear but patient was young and do not appear to have any history of CHD, angina, hypertension etc.)                                                                                                                                                                                                                                 |
| Kim 2013 (South Korea) | Pravastatin (20mg, 40mg) [L]      | Yes | 8 weeks (20/40mg), 16 weeks (20/40mg) | 81 | 20mg: 60 (36-70) yrs.; 40mg: 60 (41-69) yrs. | 100% Female | 100% Asian (South Korean) | TC, LDL-c, HDL-c            | 20mg: 26.2 (2.6); 40mg: 26.2 (3.4) | Type II | 20mg: 3 (1-10) yrs.; 40mg: 2 (1-9) yrs.                | Include: type 2 diabetes mellitus (T2DM) and hypercholesterolemia. Exclude: history of ischemic heart disease or congestive heart failure (NYH class 2) in the preceding 3 months | The concomitant use of medications such as angiotensin converting enzyme inhibitors or other angiotensin II receptor blockers at entry and the use of insulin were excluded. Patients taking thiazolidinedione in the preceding 2 months were also excluded. | <b>Low</b> (Exclusion criteria included a history of ischemic heart disease or congestive heart failure (NYH class 2) in the preceding 3 months; proliferative retinopathy or stroke; concomitant use of medications such as angiotensin converting enzyme inhibitors or other angio-tension II receptor blockers at entry and the use of insulin) |
| Kim 2016 (South Korea) | Atorvastatin (10mg [M], 40mg [H]) | No  | 8 weeks                               | 50 | 10mg: 56 (11.4); 40mg: 55.2 (13.3)           | 58%         | 100% Asian (South Korean) | TC, LDL-c, HDL-c            | 10mg: 25 (3.1); 40mg: 26.1 (4.6)   | Type II | 10mg: 4.4 (5.8); 40mg: 5.7 (6.4)                       | Patients with acute infectious disease and a history of acute myocardial infarctions within 6 months were excluded                                                                | Patients with a history of lipid lowering medication within 4 weeks (including the screening                                                                                                                                                                 | <b>Low</b> (Excluded patients were those with a history of lipid lowering medication within 4 weeks (including the screening period),                                                                                                                                                                                                              |

|                                      |                                                      |     |         |       |                      |     |                                       |                  |                 |         |        |                                                                                                                        |                                                                                                                                                                                                                |                                                                                                                                                                                                                                                                                                                                                                                                                                                                                                            |
|--------------------------------------|------------------------------------------------------|-----|---------|-------|----------------------|-----|---------------------------------------|------------------|-----------------|---------|--------|------------------------------------------------------------------------------------------------------------------------|----------------------------------------------------------------------------------------------------------------------------------------------------------------------------------------------------------------|------------------------------------------------------------------------------------------------------------------------------------------------------------------------------------------------------------------------------------------------------------------------------------------------------------------------------------------------------------------------------------------------------------------------------------------------------------------------------------------------------------|
|                                      |                                                      |     |         |       |                      |     |                                       |                  |                 |         |        |                                                                                                                        | period) were excluded.                                                                                                                                                                                         | hypersensitivity with acute infectious disease and a history of acute myocardial infarctions within 6 months)                                                                                                                                                                                                                                                                                                                                                                                              |
| Knopp 2006 (Mixed Western Countries) | Atorvastatin (10mg) [M]                              | Yes | 4 years | 2,410 | 61.1 (SD 8.1)        | 66% | 84% white (western); 6.7% black (any) | TC, LDL-c, HDL-c | 28.9 (SD 3.7)   | Type II | 8 yrs. | Documented myocardial infarction or an interventional procedure 3 months before screening were excluded.               | Subjects taking lipid-altering medications, including other statins, were screened after a 4-week washout phase, except in the case of probucol, which was discontinued for at least 6 months before screening | <b>Medium</b> (Myocardial infarction, interventional procedure, or episodes of unstable angina 3 months before screening; HbA1c(A1C) 10%; active liver disease; severe renal dysfunction of nephrotic syndrome; congestive heart failure treated with digoxin; creatine phosphokinase 3 the upper limit of normal; blood pressure 160/100mmHg; BMI 35 kg/m2; abuse of alcohol and/or drugs; hypersensitivity to the study medication; participation in another clinical study within 30 days of screening) |
| Koh 2008 (South Korea)               | Simvastatin (10mg [L], 20mg [M], 40mg [M], 80mg [H]) | Yes | 8 weeks | 156   | between 57-60 (SD 2) | 47% | 100% Asian (South Korean)             | TC, LDL-c, HDL-c | Between 25 - 27 | Type II | NR     | Patients with hypercholesterolemia included. Patient with severe hypertension, stroke, acute coronary events, coronary | No patient had taken any lipid-lowering agent or antioxidant vitamin supplements or had                                                                                                                        | <b>Low</b> (Excluded patients with overt liver disease, chronic renal failure, hypothyroidism, myopathy, uncontrolled diabetes, severe                                                                                                                                                                                                                                                                                                                                                                     |

|                        |                                                |     |         |     |                              |     |                           |                             |                                  |         |    |                                                                                                                                                                                                                                                                                                                                                                        |                                                                                                                                                        |                                                                                                                                                                                                                                                                       |
|------------------------|------------------------------------------------|-----|---------|-----|------------------------------|-----|---------------------------|-----------------------------|----------------------------------|---------|----|------------------------------------------------------------------------------------------------------------------------------------------------------------------------------------------------------------------------------------------------------------------------------------------------------------------------------------------------------------------------|--------------------------------------------------------------------------------------------------------------------------------------------------------|-----------------------------------------------------------------------------------------------------------------------------------------------------------------------------------------------------------------------------------------------------------------------|
|                        |                                                |     |         |     |                              |     |                           |                             |                                  |         |    | revascularization within the preceding 3 months were excluded.                                                                                                                                                                                                                                                                                                         | undergone hormone replacement therapy during the 2 months preceding the study.                                                                         | hypertension, stroke, acute coronary events, coronary revascularization within the preceding 3 months, or alcohol abuse)                                                                                                                                              |
| Koh 2009 (South Korea) | Pravastatin (40mg) [L], Simvastatin (20mg) [M] | Yes | 8 weeks | 127 | S: 58 (2); P: 56 (2)         | 38% | 100% Asian (South Korean) | TC, LDL-c, HDL-c            | S: 25.25 (0.53); P: 25.48 (0.48) | Type II | NR | Patients with hypercholesterolemia (low-density lipoprotein cholesterol levels $\geq 130$ mg/dl) participated. Patients with overt liver disease, chronic renal failure, hypothyroidism, myopathy, uncontrolled diabetes, severe hypertension, stroke, acute coronary events, coronary revascularization within the preceding 3 months, or alcohol abuse were excluded | No patient had taken any lipid-lowering agent, hormone replacement therapy, or antioxidant vitamin supplements during the 2 months preceding our study | <b>Medium</b> (We excluded patients with overt liver disease, chronic renal failure, hypothyroidism, myopathy, uncontrolled diabetes, severe hypertension, stroke, acute coronary events, coronary revascularization within the preceding 3 months, or alcohol abuse) |
| Koh 2016 (South Korea) | Rosuvastatin (5mg) [M], 10mg [M], 20mg [H]     | Yes | 8 weeks | 190 | Between 56-58 yrs. (SD: 7-8) | 50% | 100% Asian (South Korean) | Non-HDL-c, TC, LDL-c, HDL-c | Between 24.98 - 25.64            | Type II | NR | More than half patients were hypertensive. There were some patients with stable angina in each group. Patients with overt liver disease, chronic renal failure, hypothyroidism, myopathy, uncontrolled diabetes, severe                                                                                                                                                | No patient had taken any lipid-lowering agent, hormone replacement therapy, or antioxidant vitamin supplements during the 2 months preceding the study | <b>Medium</b> (>60% Hypertension)                                                                                                                                                                                                                                     |

|                    |                         |     |          |     |                  |     |                                                                |                             |            |         |    |                                                                                                                                                              |                                                                                                                                                                                                                                                     |                                                                                                                                                                                                                                                                                                         |
|--------------------|-------------------------|-----|----------|-----|------------------|-----|----------------------------------------------------------------|-----------------------------|------------|---------|----|--------------------------------------------------------------------------------------------------------------------------------------------------------------|-----------------------------------------------------------------------------------------------------------------------------------------------------------------------------------------------------------------------------------------------------|---------------------------------------------------------------------------------------------------------------------------------------------------------------------------------------------------------------------------------------------------------------------------------------------------------|
|                    |                         |     |          |     |                  |     |                                                                |                             |            |         |    | hypertension, stroke, unstable angina, acute myocardial infarction, coronary revascularization within the preceding 3 months, or alcohol abuse were excluded |                                                                                                                                                                                                                                                     |                                                                                                                                                                                                                                                                                                         |
| Lawrence 2004 (UK) | Atorvastatin (80mg) [H] | Yes | 8 weeks  | 40  | 63 (9)           | 53% | NR                                                             | TC, LDL-c, HDL-c            | 31.1 (5.6) | Type II | NR | Total cholesterol >5 mmol/L at recruitment                                                                                                                   | Patients had to be on oral hypoglycaemic agents in monotherapy or combination therapy with metformin and/or a sulphonylurea with an HbA1c <10%. Patients were excluded if prescribed insulin or a thiazolidinedione (pioglitazone or rosiglitazone) | <b>Low</b> (This included patients with manifest macrovascular disease and those with a calculated coronary heart disease (CHD) risk over the next 10 years of greater than 30% in line with current recommendations of the Joint British Societies Guidelines on Prevention of Coronary Heart Disease) |
| Lewin 2004 (US)    | Simvastatin (40mg) [M]  | Yes | 24 weeks | 233 | 55 (Range 27-78) | 52% | 46.3% white (western); 30.1% Hispanic; 6.5% black; 17.1% other | Non-HDL-c, TC, LDL-c, HDL-c | 32 (5.4)   | Type II | NR | Participants had glycosylated haemoglobin (HbA1c) value ≤9.0% and an LDL-C concentration >100 mg/dL at recruitment                                           | Eligible patients had been taking a stable dosage of pioglitazone (15–45 mg/d) or rosiglitazone (2–8 mg/d) for ≥3 months before screening                                                                                                           | <b>Medium</b> (Patient had a history of hyperlipidaemic pancreatitis, CHD, or other atherosclerotic disease and a diagnosis of type 1 DM, type I or IV hyperlipidaemia, or homozygous familial hypercholesterolemia)                                                                                    |

|                   |                                                               |    |                                     |     |                                             |        |                                                   |                             |                                           |         |               |                                                                                                                                                                                            |                                                                                                                                                                                 |                                                                                                                                                                                                                                                                                                                                                                                                   |
|-------------------|---------------------------------------------------------------|----|-------------------------------------|-----|---------------------------------------------|--------|---------------------------------------------------|-----------------------------|-------------------------------------------|---------|---------------|--------------------------------------------------------------------------------------------------------------------------------------------------------------------------------------------|---------------------------------------------------------------------------------------------------------------------------------------------------------------------------------|---------------------------------------------------------------------------------------------------------------------------------------------------------------------------------------------------------------------------------------------------------------------------------------------------------------------------------------------------------------------------------------------------|
| Liu 2013 (Taiwan) | Atorvastatin (10mg) [M], Pitavastatin (2mg) [M]               | No | 4 weeks (2/10mg), 12 weeks (2/10mg) | 225 | 58.7 (8.6)                                  | 61.80% | 100% Asian (Taiwanese)                            | Non-HDL-c, TC, LDL-c, HDL-c | 26.4 (3.5)                                | Type II | NR            | Coronary artery disease 78 participants (34.7%)<br>Hypertension 17 participants (75.6%)                                                                                                    | During the study period, fibrates, other statins, probucol, and cyclosporine were prohibited. No other medication was reported.                                                 | <b>High</b> (Patient were considered "high-risk", thus they had to meet at least one of the following criteria (NCEP ATP III guideline): 1) documented CHD; 2) type 2 DM; 3) if the patient had fewer than 2 risk factors (other than LDL) present in the following items without CHD or a CHD risk equivalent, a 10-year (short-term) CHD risk had to be assessed with a Framingham score > 20%) |
| Miller 2004 (US)  | Simvastatin (40mg [M], 80mg [H])                              | No | 6 weeks                             | 151 | 58.9 (9.8)                                  | 71%    | 89% white (western); 6% black; 1% Asian; 3% other | Non-HDL-c, TC, LDL-c, HDL-c | 33.4 (6.2)                                | Type II | 6.4 (6) years | Patients with uncontrolled hypertension (systolic > 160 systolic or diastolic > 100 mm Hg) or a history of recent (within 3 months of randomization) acute coronary syndrome were excluded | The most commonly used medications were metformin (50%), rosiglitazone (20%), glyburide (17%), glipizide (15%), pioglitazone hydrochloride (13%), and glyburide-metformin (11%) | <b>Low</b> (patients with uncontrolled hypertension (systolic > 160 systolic or diastolic > 100 mmHg) or a history of recent (within 3 months of randomization) acute coronary syndrome were exclude)                                                                                                                                                                                             |
| Mori 2013 (Japan) | Atorvastatin (10mg) [M], Pravastatin (10mg) [L], Rosuvastatin | No | 12 weeks                            | 128 | A: 63.2 (1.5); R: 62.5 (1.6); P: 66.2 (1.5) | 46%    | 100% Asian (Japanese)                             | Non-HDL-c, TC, LDL-c, HDL-c | A: 24.5 (0.6); R: 26 (0.6); P: 24.3 (0.6) | Type II | NR            | Patients with a history of stroke or ischemic heart disease during the                                                                                                                     | Patients already using statins were enrolled if their eligibility was confirmed                                                                                                 | <b>Low</b> (Patients with a history of stroke or ischemic heart disease during the previous 6 months, patients with liver diseases, patients                                                                                                                                                                                                                                                      |

|                          |                                                          |     |                                     |    |            |     |                     |                  |            |         |             |                                                                                                                                                                                                                                                                                   |                                                                                                                                                                          |                                                                                                                        |
|--------------------------|----------------------------------------------------------|-----|-------------------------------------|----|------------|-----|---------------------|------------------|------------|---------|-------------|-----------------------------------------------------------------------------------------------------------------------------------------------------------------------------------------------------------------------------------------------------------------------------------|--------------------------------------------------------------------------------------------------------------------------------------------------------------------------|------------------------------------------------------------------------------------------------------------------------|
|                          | n (5mg) [M]                                              |     |                                     |    |            |     |                     |                  |            |         |             | previous 6 months were excluded                                                                                                                                                                                                                                                   | after 1 month or more of washout following signing the consent form                                                                                                      | with nephropathy were excluded from the study)                                                                         |
| Nora 2003 (Italy)        | Atorvastatin (10mg) [M]                                  | Yes | 48 weeks                            | 25 | 66 (8)     | 60% | NR                  | TC, LDL-c, HDL-c | 30 (3.2)   | Type II | 10 (4) yrs. | Inclusion criteria were HbA1c less than 9%, absence of macroangiopathic complications (no personal history of major cardiovascular or cerebrovascular events, normal resting ECG, and LDL-cholesterol < 180 mg/dl. Patients assuming ACE- inhibitors were excluded from the study | 14 patients were treated with a combination of sulphonylurea plus metformin; 3 with metformin and 7 with sulphonylurea only                                              | <b>High</b> (Age above 70, Duration of diabetes over 10 yrs., hypertension present in over 50% of patients, and obese) |
| Paolisso 1991 (Italy)    | Atorvastatin (5mg) [L], Simvastatin (10mg [L], 30mg [M]) | Yes | 3 weeks (30mg), 8 weeks (5mg, 10mg) | 12 | 72.3 (1.4) | 50% | NR                  | TC, LDL-c, HDL-c | 27.2 (0.6) | Type II | 8.5 (0.9)   | Patients were moderately obese, hypercholesteremic, non-insulin dependent (Type II) diabetic                                                                                                                                                                                      | The patients stopped taking oral hypoglycaemic agents or other drugs at least 3 weeks before the experiments                                                             | <b>Moderate</b> (unclear but due to high mean age and moderate obese nature of patients coded as high)                 |
| Schneider 2004 (Germany) | Atorvastatin (40mg) [H]                                  | Yes | 8 weeks                             | 61 | 61.4 (8.2) | 61% | 100% White European | TC, LDL-c, HDL-c | 29.2 (4.1) | Type II | 19.3 (11.4) | Patients with fasting triglyceride level >11.4mmol/L (1.000 mg/dl) were excluded                                                                                                                                                                                                  | Exclusion criteria were intravenous or subcutaneous heparin treatment in the 72h before the study, contraindications for heparin or statin treatment, and lipid lowering | <b>High</b> (Unclear but age and duration of diabetes diagnosis would suggest high risk of CVD and MACE outcomes)      |

|                                            |                                                        |     |                       |      |                                                             |                                          |                           |                             |                                                            |         |                                                         |                                                                                                                                                                                                                                                                                                                        |                                                                                                                                                |                                                                                                                                                                                                                                                                                                                   |
|--------------------------------------------|--------------------------------------------------------|-----|-----------------------|------|-------------------------------------------------------------|------------------------------------------|---------------------------|-----------------------------|------------------------------------------------------------|---------|---------------------------------------------------------|------------------------------------------------------------------------------------------------------------------------------------------------------------------------------------------------------------------------------------------------------------------------------------------------------------------------|------------------------------------------------------------------------------------------------------------------------------------------------|-------------------------------------------------------------------------------------------------------------------------------------------------------------------------------------------------------------------------------------------------------------------------------------------------------------------|
|                                            |                                                        |     |                       |      |                                                             |                                          |                           |                             |                                                            |         |                                                         |                                                                                                                                                                                                                                                                                                                        | therapy in the last 3 months                                                                                                                   |                                                                                                                                                                                                                                                                                                                   |
| Sever 2005 (UK, Ireland, Nordic countries) | Atorvastatin (10mg) [M]                                | Yes | 24, 48, 96, 144 weeks | 2532 | 63.6 (8.5)                                                  | 77%                                      | 90% White western         | TC, LDL-c, HDL-c            | 30.3 (5)                                                   | Type II | NR                                                      | Patients with previous myocardial infarction, currently treated angina, a cerebrovascular event within the previous 3 months, fasting triglyceride level 4.5 mmol/l, heart failure, uncontrolled arrhythmias, or any clinically important haematological or biochemical abnormality on routine screening were excluded | At randomization, 52% of the diabetic patients were receiving oral hypoglycaemic drugs, and 7% were receiving insulin                          | <b>Medium</b> (<8% previous stroke/ischemic heart attack, <6% vascular disease; <4% other CVD; number of risk factors (inc. diabetes), 4.1 (1)                                                                                                                                                                    |
| Sindhu 2011 (India)                        | Atorvastatin (40-80mg) [H], Rosuvastatin (10-40mg) [H] | No  | 24 weeks              | 40   | A: 49 (8.99); R: 49.1 (6.82)                                | 65%                                      | 100% Asian (Indian)       | TC, LDL-c, HDL-c            | A: 32.15 (1.40); R: 32.1 (1.72)                            | Type II | NR                                                      | Patients with significant cardiovascular dysfunction were excluded                                                                                                                                                                                                                                                     | NR                                                                                                                                             | <b>Medium</b> (unclear but relatively Middle Aged and no mention of MACE outcomes regardless being obese and T2D diagnosed)                                                                                                                                                                                       |
| Son 2013 (South Korea)                     | Atorvastatin (10mg [M], 20mg [M], 40mg [H])            | No  | 8 weeks               | 474  | 10mg: 58.47 (11.20); 20mg: 59.37 (9.51); 40mg: 58.87 (9.09) | 10mg: 45.65%; 20mg: 38.33%; 40mg: 29.17% | 100% Asian (South Korean) | Non-HDL-c, TC, LDL-c, HDL-c | 10mg: 25.41 (3.49); 20mg: 25.75 (4.92); 40mg: 25.97 (3.27) | Type II | 10mg: 6.45 (6.77); 20mg: 6.32 (6.57); 40mg: 4.54 (5.81) | Patients were excluded if they had a history of CHD, cerebrovascular disease or peripheral vascular disease                                                                                                                                                                                                            | Medications known to affect lipid levels or to interact with the medications used in this trial were prohibited for the duration of the study. | <b>Low</b> (Patients were statin free at start of trial, and were exclude if they had a history of CHD, cerebrovascular disease or peripheral vascular disease, impaired hepatic or renal function, elevation of creatinine kinase levels, uncontrolled hypertension, uncontrolled hypothyroidism, alcohol or any |



|                           |                                                   |     |             |     |                 |                   |                      |                  |                                   |              |    |                                                                                                                                                                                                                                                                                                                                                                                                                             |                                                                                                                                                                    |                                                                                                                                                                                                                                                                                                                                                                                                                                                                                             |
|---------------------------|---------------------------------------------------|-----|-------------|-----|-----------------|-------------------|----------------------|------------------|-----------------------------------|--------------|----|-----------------------------------------------------------------------------------------------------------------------------------------------------------------------------------------------------------------------------------------------------------------------------------------------------------------------------------------------------------------------------------------------------------------------------|--------------------------------------------------------------------------------------------------------------------------------------------------------------------|---------------------------------------------------------------------------------------------------------------------------------------------------------------------------------------------------------------------------------------------------------------------------------------------------------------------------------------------------------------------------------------------------------------------------------------------------------------------------------------------|
|                           |                                                   |     |             |     |                 |                   |                      |                  |                                   |              |    |                                                                                                                                                                                                                                                                                                                                                                                                                             |                                                                                                                                                                    | other drug abuse, a history of hypersensitivity to statins)                                                                                                                                                                                                                                                                                                                                                                                                                                 |
| Tekin 2008 (Turkey)       | Simvastatin (40mg) [M]                            | Yes | 6, 12 weeks | 90  | Between 52 - 55 | Between 57% - 67% | 100% Asian (Turkish) | TC, LDL-c, HDL-c | Between 26 - 30 kg/m <sup>2</sup> | Type I or II | NR | Patients excluded if they had heart failure, left bundle-branch block, cardiac rhythm other than sinus, presence of significant vascular disease and myocardial dysfunction on transthoracic echocardiography, previous therapy with lipid lowering medications and clinical evidence of coronary artery disease defined as history of angina, myocardial infarction, percutaneous coronary intervention or bypass surgery. | Concomitant medications aspirin, angiotensin-converting enzyme inhibitor, angiotensin-receptor blocker beta-blocker Diuretic, oral antidiabetics Insulin           | <b>Low</b> (younger age of patients, and exclusion criteria being uncontrolled hypertension, heart failure, left bundle-branch block, cardiac rhythm other than sinus, presence of significant vascular disease and myocardial dysfunction on transthoracic echocardiography, previous therapy with lipid lowering medications and clinical evidence of coronary artery disease defined as history of angina, myocardial infarction, percutaneous coronary intervention, or bypass surgery) |
| Thongtang 2020 (Thailand) | Atorvastatin (40mg) [H], Simvastatin (≤ 20mg) [L] | No  | 6 weeks     | 150 | 58.8 (8.9)      | 28%               | 100% Asian (Thai)    | TC, LDL-c, HDL-c | 27.6 (4.5)                        | Type II      | NR | Patients having established ASCVD were excluded                                                                                                                                                                                                                                                                                                                                                                             | Patients with a history of receiving a stable dose of simvastatin up to 20 mg/day for at least 3 months prior to the start of the study were included at enrolment | <b>High</b> (included high intensity statin group as mentioned in paper; receiving a stable dose of simvastatin up to 20 mg/day for at least 3 months prior to the start of the study, and plasma LDL-C level less than 100 mg/dl at the time of randomization)                                                                                                                                                                                                                             |

|                                  |                                                                                  |     |              |     |         |     |                    |                             |            |         |                                                   |                                                                                                                                                                                                                                                                            |                                                                                                                                                                                         |                                                                                                                                                                                                      |
|----------------------------------|----------------------------------------------------------------------------------|-----|--------------|-----|---------|-----|--------------------|-----------------------------|------------|---------|---------------------------------------------------|----------------------------------------------------------------------------------------------------------------------------------------------------------------------------------------------------------------------------------------------------------------------------|-----------------------------------------------------------------------------------------------------------------------------------------------------------------------------------------|------------------------------------------------------------------------------------------------------------------------------------------------------------------------------------------------------|
| Visseren 2001 (Netherlands)      | Fluvastatin (40mg) [L]                                                           | Yes | 12, 24 weeks | 42  | 60 (8)  | 76% | 95% White European | TC, LDL-c, HDL-c            | 28.2 (3.5) | Type II | 11.1 (8.3) yrs.                                   | Patients were excluded from the study if they had a history of myocardial infarction or coronary angioplasty within 6 months prior to the study, severe congestive heart failure (NYHA grade II-IV), unstable angina pectoris, poorly controlled severe hypertension       | NR                                                                                                                                                                                      | <b>High</b> (48% had history of CAD, long duration of T2D, almost obese, over 60 yrs. of age, already in receipt of stable insulin therapy)                                                          |
| Winkler 2002 (Germany)           | Fluvastatin (80mg) [M]                                                           | Yes | 8 weeks      | 89  | 68 (10) | 55% | NR                 | TC, LDL-c, HDL-c            | 30.5 (4.1) | Type II | Diagnosed at least 12 weeks before start of trial | Exclusion criteria included among others myocardial infarction, or angioplasty during the 6 months before randomization                                                                                                                                                    | Patients receiving lipid-lowering therapy during the 8 wk. before the study; and use of insulin and oral contraceptives at the start of the study were excluded                         | <b>High</b> (31% history of CHD, 10% CVD, 69% hypertension, over 60 yrs. and obese)                                                                                                                  |
| Wolffenbuttel 2005 (Netherlands) | Atorvastatin (20mg [M], 40mg [H], 80mg [H]), Rosuvastatin (10mg, 20mg, 40mg) [H] | No  | 6 weeks      | 263 | 60 (10) | 46% | NR                 | Non-HDL-c, TC, LDL-c, HDL-c | 31.4 (6.1) | Type II | NR                                                | Subjects with active cardiovascular disease (uncontrolled hypertension >200/ >95 mmHg), heart failure NYHA class IV, recent unstable AP, myocardial infarction, transient ischaemic attack, cerebrovascular accident, coronary artery bypass surgery or angioplasty within | Concomitant treatment with erythromycin, clarithromycin, azole antifungal agents, cyclosporin, antiviral agents, phenytoin, carbamazepine, phenobarbital, or nefazodone, was prohibited | <b>Low</b> (2% angina; 6% current angina pectoris; 0% percutaneous transluminal coronary angioplasty; 2% coronary artery bypass surgery; 2% cerebrovascular accident; 2% transient ischaemic attack) |

|                      |                         |     |          |     |            |     |                      |                             |    |              |                |                                                                                                                                |                                                                                                                                                                                                                                                                                                                                                                                                                                       |                                                                                                      |
|----------------------|-------------------------|-----|----------|-----|------------|-----|----------------------|-----------------------------|----|--------------|----------------|--------------------------------------------------------------------------------------------------------------------------------|---------------------------------------------------------------------------------------------------------------------------------------------------------------------------------------------------------------------------------------------------------------------------------------------------------------------------------------------------------------------------------------------------------------------------------------|------------------------------------------------------------------------------------------------------|
|                      |                         |     |          |     |            |     |                      |                             |    |              |                | the previous 2 months, or likely to undergo coronary artery intervention within 6 months after randomization were not eligible |                                                                                                                                                                                                                                                                                                                                                                                                                                       |                                                                                                      |
| Xu 2007 (China)      | Atorvastatin (20mg) [M] | Yes | 84 weeks | 648 | NR         | NR  | 100% Asian (Chinese) | Non-HDL-c, TC, LDL-c, HDL-c | NR | Type I or II | 9.4 yrs.       | Patients had both diabetes and coronary artery disease                                                                         | <p>Treatment for diabetes was maintained during the study: insulin (n=267), sulfonylureas (n=101), alpha-glucosidase inhibitors (n=137), nateglinide (n=107).</p> <p>The proportion of patients taking other cardiovascular drugs, such as acetylsalicylic acid, clopidogrel, beta-blockers, calcium antagonists, nitrates and angiotensin-converting enzyme inhibitors after PCI was similar between the groups (data not shown)</p> | <b>High</b> (Involved patients with history of CAD and undergone percutaneous coronary intervention) |
| Zhang 1995 (Belgium) | Pravastatin (20mg) [L]  | Yes | 12 weeks | 20  | 43 (Range) | 80% | NR                   | TC, LDL-c, HDL-c            | NR | Type I or II | 21 (4-44) yrs. | Nine patients had peripheral                                                                                                   | All groups received                                                                                                                                                                                                                                                                                                                                                                                                                   | <b>High</b> (10, 50% of patients had CHD)                                                            |

|  |  |  |  |  |                |  |  |  |  |  |  |                                                                                                                                                   |                                      |  |
|--|--|--|--|--|----------------|--|--|--|--|--|--|---------------------------------------------------------------------------------------------------------------------------------------------------|--------------------------------------|--|
|  |  |  |  |  | 29-61)<br>yrs. |  |  |  |  |  |  | arteriosclerosis diagnosed by Doppler; 11-patients had hypertension, and 10 patients had coronary heart disease identified by positive ECG change | insulin therapy throughout the trial |  |
|--|--|--|--|--|----------------|--|--|--|--|--|--|---------------------------------------------------------------------------------------------------------------------------------------------------|--------------------------------------|--|

\*Intensities defined as: L: Low; M: Moderate and H: High. <sup>‡</sup>Gender abbreviations: M: Males; F: Females

<sup>†</sup>The patient-risk classifications were initially categorised as 'low/moderate/high' risk according to baseline and inclusion/exclusion criteria within the original report. We then categorised into the following two groups for the subgroup analysis: (i) high risk patients involving those with a history of MACE outcomes (i.e., nonfatal stroke, nonfatal MI, CHD or CVD), and (ii) low-to-moderate risk patients involving those that have not experienced a previous or current MACE outcome at baseline.

<sup>‡</sup>Ethnicity was classified using the office for national statistics guidance: <https://www.ons.gov.uk/methodology/classificationsandstandards/measuringequality/ethnicgroupnationalidentityandreligion#ethnic-group>

N: not reported; TC: total cholesterol; LDL-C: low-density lipoprotein- cholesterol; HDL-C: high-density lipoprotein cholesterol. Yrs: Years.

## Appendix 5: Risk of Bias Assessment

| Study                               | 1. Randomization process | 2. Deviations from intended interventions | 3. Missing outcome data | 4. Measurement of the outcome | 5. Selection of the reported result | 6. Overall Bias* |
|-------------------------------------|--------------------------|-------------------------------------------|-------------------------|-------------------------------|-------------------------------------|------------------|
| <b>Behounek 1994</b>                | Some concerns            | Low                                       | Some concerns           | High                          | High                                | 3                |
| <b>Berberoglu 2009</b>              | Low                      | High                                      | Some concerns           | Low                           | Low                                 | 2                |
| <b>Betteridge &amp; Gibson 2007</b> | Low                      | Low                                       | Low                     | Some concerns                 | Low                                 | 1                |
| <b>Chang 2013</b>                   | Some concerns            | Some concerns                             | Some concerns           | High                          | High                                | 3                |
| <b>Cheung 2005</b>                  | Some concerns            | Some concerns                             | Some concerns           | High                          | Low                                 | 2                |
| <b>Chu 2008</b>                     | High                     | High                                      | Some concerns           | Low                           | Some concerns                       | 3                |
| <b>Colhoun 2004</b>                 | Low                      | Low                                       | Low                     | Low                           | Low                                 | 1                |
| <b>DALI Study Group 2001</b>        | Some concerns            | Some concerns                             | Low                     | Low                           | Low                                 | 1                |
| <b>Dallinga-Thie 2009</b>           | High                     | Some concerns                             | Some concerns           | Some concerns                 | High                                | 3                |
| <b>Ferrer-García 2008</b>           | Some concerns            | Some concerns                             | Low                     | Low                           | Low                                 | 2                |
| <b>Gentile 2000</b>                 | Some concerns            | Some concerns                             | Low                     | High                          | Some concerns                       | 3                |
| <b>Goldberg 2006</b>                | Some concerns            | Low                                       | Low                     | Low                           | Low                                 | 1                |
| <b>Hadjibabaie 2006</b>             | Some concerns            | Some concerns                             | High                    | High                          | High                                | 3                |
| <b>Ichihara 2002</b>                | Some concerns            | Low                                       | High                    | High                          | High                                | 3                |
| <b>Insull 2001</b>                  | Low                      | Some concerns                             | Low                     | Some concerns                 | Low                                 | 1                |
| <b>Ishigaki 2013</b>                | Low                      | Some concerns                             | Some concerns           | Low                           | Low                                 | 1                |
| <b>Janatuinen 2004</b>              | Some concerns            | Some concerns                             | Low                     | Low                           | Low                                 | 1                |
| <b>Jialal 2007</b>                  | Some concerns            | Low                                       | Some concerns           | Low                           | Low                                 | 1                |
| <b>Kim 2013</b>                     | Low                      | Some concerns                             | Low                     | Low                           | Low                                 | 1                |
| <b>Kim 2016</b>                     | High                     | High                                      | Some concerns           | Low                           | Low                                 | 3                |
| <b>Knopp 2006</b>                   | Some concerns            | Low                                       | Low                     | Low                           | Low                                 | 1                |
| <b>Koh 2008</b>                     | Some concerns            | Low                                       | Low                     | Low                           | Some concerns                       | 1                |
| <b>Koh 2009</b>                     | Some concerns            | Some concerns                             | Some concerns           | Low                           | Low                                 | 2                |
| <b>Koh 2016</b>                     | Low                      | Low                                       | Some concerns           | Low                           | Some concerns                       | 1                |
| <b>Lawrence 2004</b>                | Some concerns            | Some concerns                             | Some concerns           | High                          | Some concerns                       | 2                |

|                          |               |               |               |               |               |   |
|--------------------------|---------------|---------------|---------------|---------------|---------------|---|
| <b>Lewin 2004</b>        | Some concerns | Some concerns | High          | Low           | Low           | 2 |
| <b>Liu 2013</b>          | Low           | Low           | Low           | Low           | Low           | 1 |
| <b>Miller 2004</b>       | Low           | Some concerns | Low           | High          | Some concerns | 2 |
| <b>Mori 2013</b>         | Some concerns | Some concerns | High          | Low           | Low           | 2 |
| <b>Nora 2003</b>         | Some concerns | Some concerns | Low           | Some concerns | Some concerns | 2 |
| <b>Paolisso 1991</b>     | Some concerns | Some concerns | Low           | High          | Some concerns | 3 |
| <b>Schneider 2004</b>    | Some concerns | Some concerns | Some concerns | Some concerns | Some concerns | 2 |
| <b>Sever 2005</b>        | Low           | Low           | Some concerns | Low           | Low           | 1 |
| <b>Sindhu 2011</b>       | Low           | Some concerns | Low           | Some concerns | Some concerns | 1 |
| <b>Son 2013</b>          | High          | High          | Some concerns | Low           | Low           | 3 |
| <b>Thongtang 2020</b>    | Low           | Some concerns | Low           | Low           | Low           | 1 |
| <b>Visseren 2001</b>     | Some concerns | Low           | Low           | Low           | Some concerns | 1 |
| <b>Winkler 2002</b>      | Some concerns | Some concerns | High          | Low           | Low           | 1 |
| <b>Wolfenbittel 2005</b> | Low           | Some concerns | Low           | Low           | Some concerns | 1 |
| <b>Xu 2007</b>           | Some concerns | High          | Some concerns | High          | High          | 3 |
| <b>Zhang 1995</b>        | High          | High          | Some concerns | High          | High          | 3 |

\*The overall risk of bias judgement was classified as follows: 'low = 1': when study was judge to be at low risk of bias for all domains with some concerns showing; 'Some concerns = 2': when the study is judged to raise more domains with at least some concerns or high risk of bias in at least one domain; 'High = 3': Study is judged to be at high risk of bias in at least one domain and/or to have some concerns for multiple domains in a way that substantially lowers confidence in the result.

### Risk of Bias contribution by intervention group

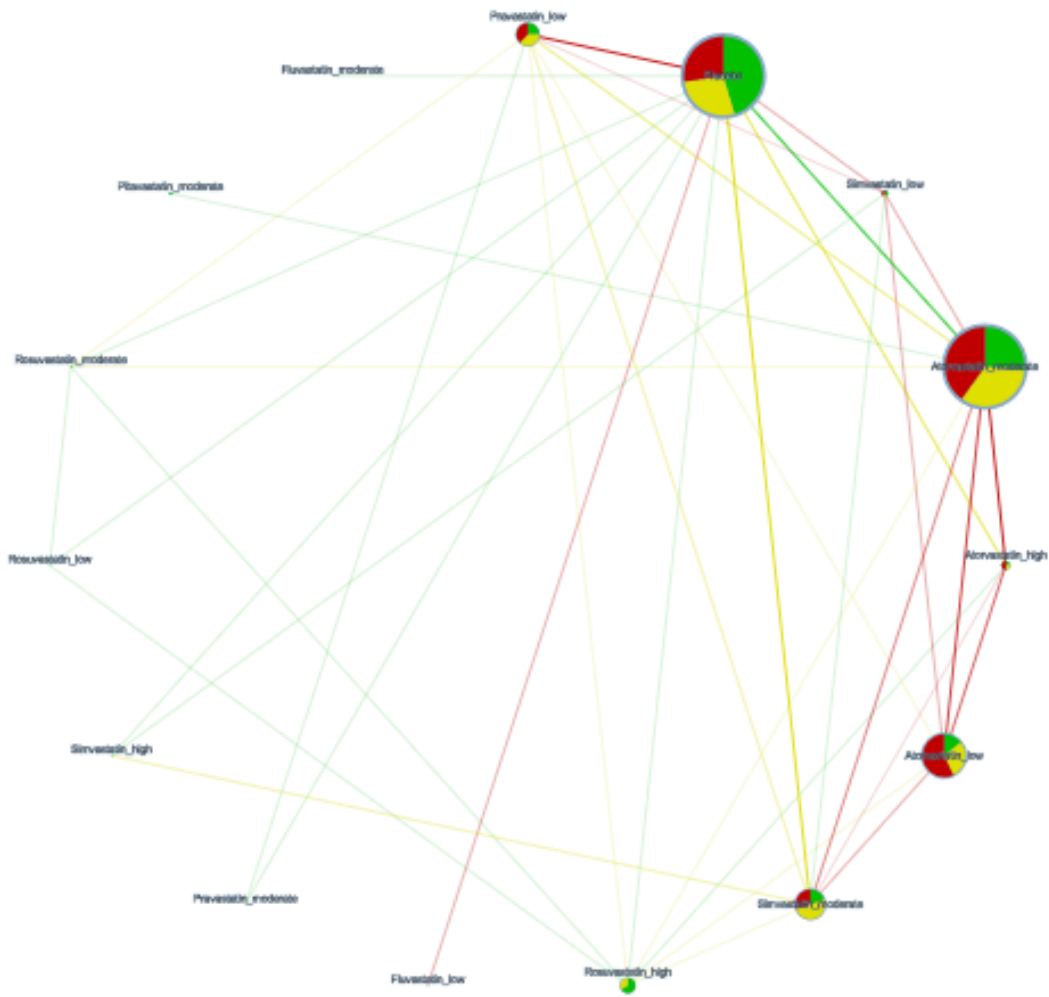

## Overall risk of bias by treatment comparison

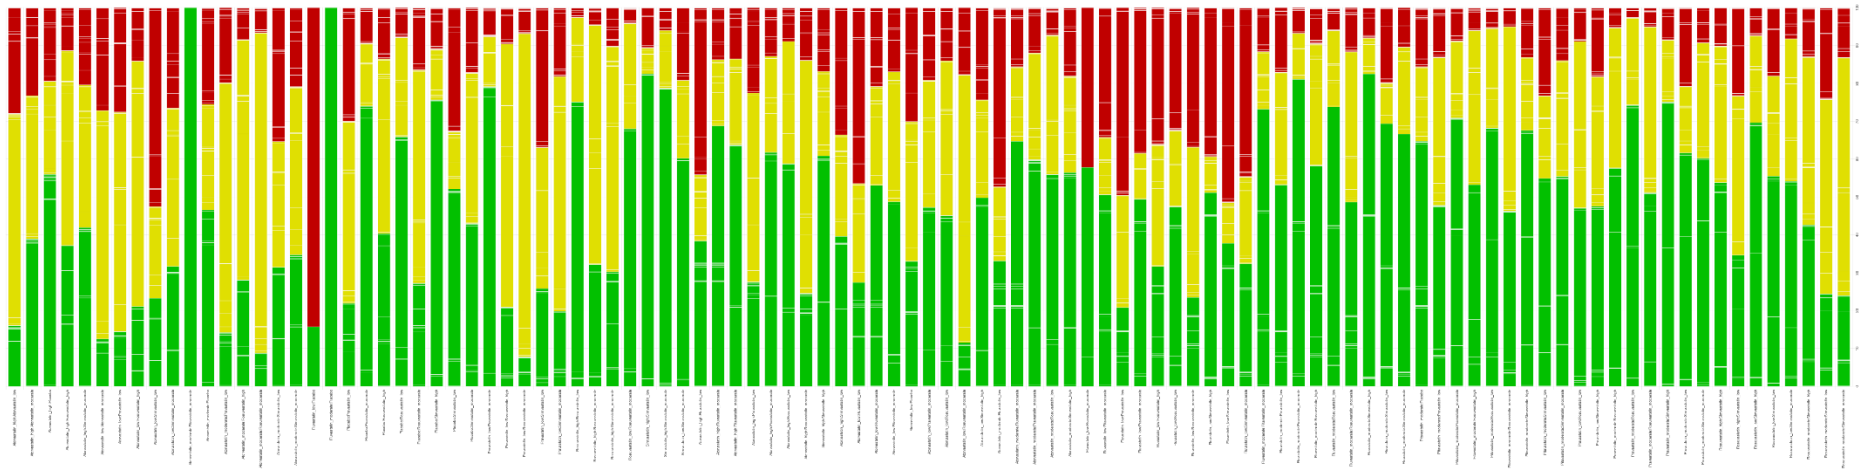



# Appendix 6: Deviance statistics of convergence model, Mean Posterior values by Dose and Meta-Analysis of Direct (Pairwise) Evidence

## Random effects leverage plot with deviance statistics for non-HDL-C convergence model

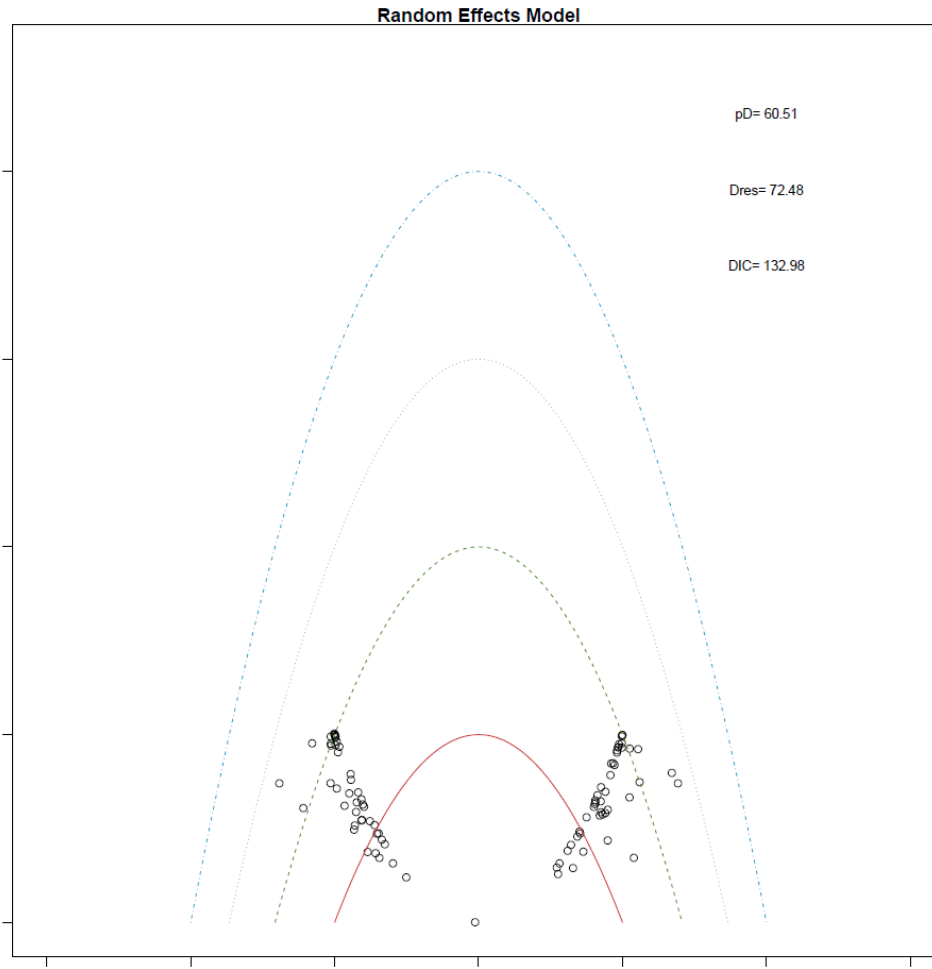

**Box Plots of Posterior mean of non-HDL-C by statin dose**

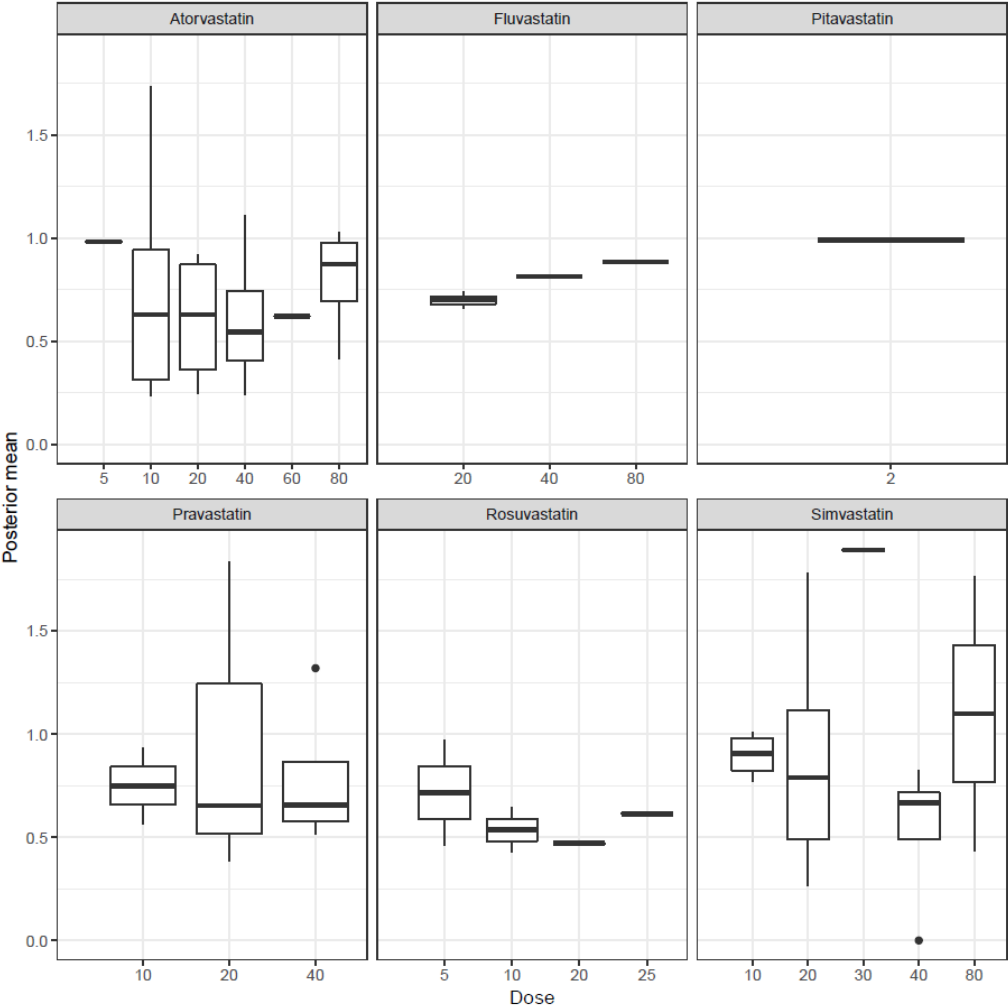

### Profile plots of Treatment Response by Dose for non-HDL-C

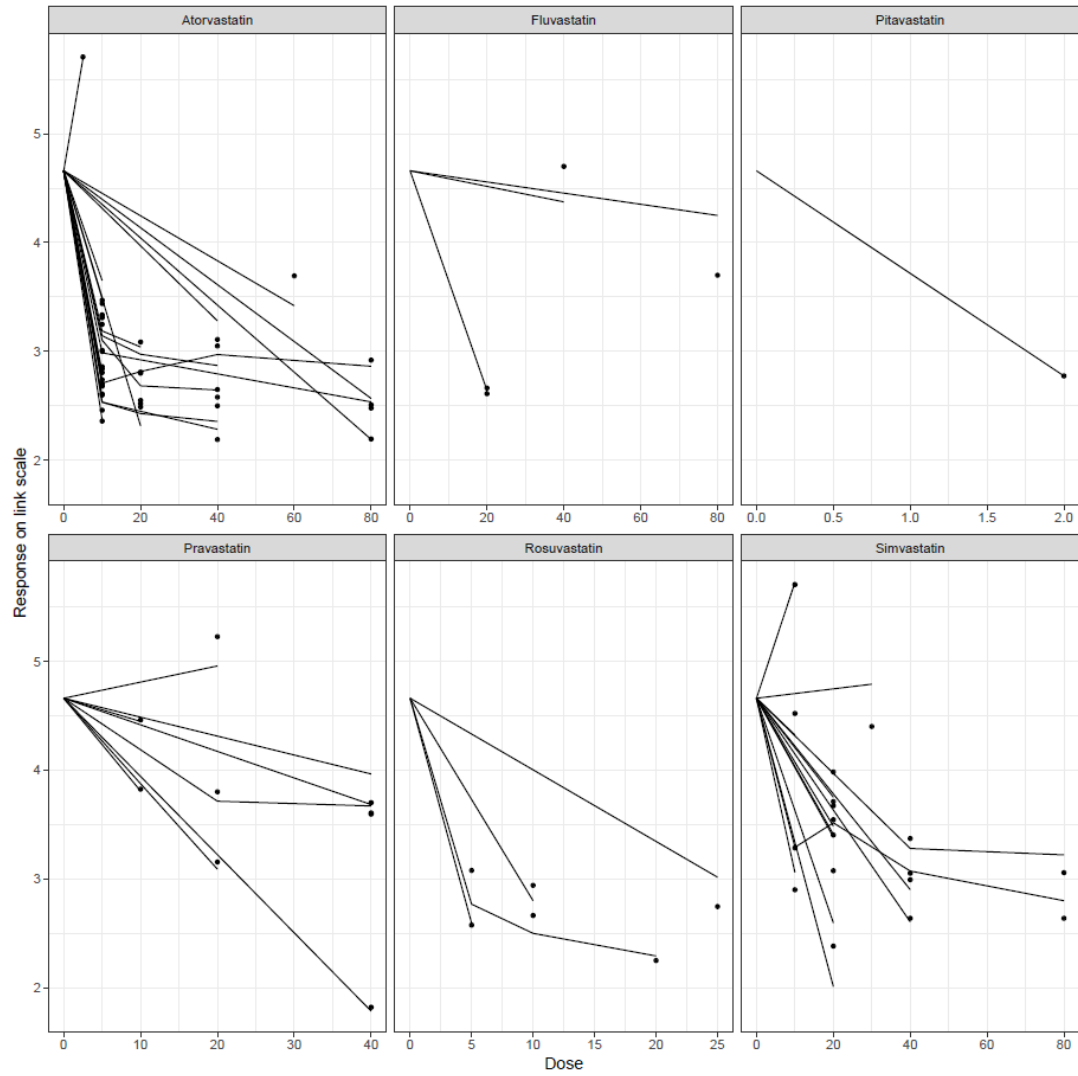

**Meta-analysis of all direct (pairwise) evidence for non-HDL-C including the number of studies and number of patients**

| <b>Comparisons</b>                              | <b>No. of studies</b> | <b>No. of Patients</b> | <b>Effect size (95% CI)</b> |
|-------------------------------------------------|-----------------------|------------------------|-----------------------------|
| Atorvastatin_high vs. Atorvastatin_low          | 4                     | 1175                   | 0.07 (-0.64 to 0.77)        |
| Atorvastatin_high vs. Atorvastatin_moderate     | 6                     | 649                    | 0.16 (-0.17 to 0.49)        |
| Atorvastatin_high vs. Placebo                   | 4                     | 305                    | -2.44 (-2.73 to -2.16)      |
| Atorvastatin_high vs. Rosuvastatin_high         | 1                     | 35                     | 0.95 (-2.05 to 3.94)        |
| Atorvastatin_high vs. Simvastatin_moderate      | 1                     | 377                    | -1.21 (-3.66 to 1.24)       |
| Atorvastatin_low vs. Atorvastatin_moderate      | 5                     | 2781                   | 0.10 (-0.36 to 0.56)        |
| Atorvastatin_low vs. Pravastatin_low            | 1                     | 1050                   | -0.36 (-2.30 to 1.59)       |
| Atorvastatin_low vs. Rosuvastatin_high          | 1                     | 1067                   | -0.31 (-2.00 to 1.39)       |
| Atorvastatin_low vs. Simvastatin_low            | 2                     | 280                    | -0.01 (-0.35 to 0.34)       |
| Atorvastatin_low vs. Simvastatin_moderate       | 2                     | 2152                   | -0.20 (-1.86 to 1.47)       |
| Atorvastatin_moderate vs. Pitavastatin_moderate | 1                     | 225                    | 0.07 (-2.10 to 2.24)        |
| Atorvastatin_moderate vs. Placebo               | 5                     | 4140                   | -2.00 (-2.26 to -1.73)      |
| Atorvastatin_moderate vs. Pravastatin_low       | 3                     | 1691                   | -1.29 (-2.00 to -0.57)      |
| Atorvastatin_moderate vs. Rosuvastatin_high     | 1                     | 1463                   | -0.15 (-2.00 to 1.71)       |
| Atorvastatin_moderate vs. Rosuvastatin_moderate | 1                     | 79                     | 0.23 (-0.11 to 0.57)        |
| Atorvastatin_moderate vs. Simvastatin_low       | 2                     | 188                    | -0.84 (-1.86 to 0.18)       |
| Atorvastatin_moderate vs. Simvastatin_moderate  | 3                     | 1882                   | -0.59 (-2.04 to 0.85)       |
| Fluvastatin_low vs. Placebo                     | 2                     | 109                    | -0.07 (-1.07 to 0.93)       |
| Fluvastatin_moderate vs. Placebo                | 1                     | 89                     | -1.43 (-4.31 to 1.45)       |
| Placebo vs. Pravastatin_low                     | 6                     | 686                    | -1.00 (-1.70 to -0.31)      |
| Placebo vs. Pravastatin_moderate                | 1                     | 45                     | -0.90 (-3.33 to 1.53)       |
| Placebo vs. Rosuvastatin_high                   | 1                     | 95                     | -1.99 (-4.34 to 0.36)       |
| Placebo vs. Rosuvastatin_low                    | 1                     | 95                     | -1.16 (-3.77 to 1.44)       |
| Placebo vs. Rosuvastatin_moderate               | 1                     | 96                     | -1.58 (-3.98 to 0.83)       |
| Placebo vs. Simvastatin_high                    | 1                     | 63                     | -2.35 (-2.82 to -1.89)      |
| Placebo vs. Simvastatin_low                     | 2                     | 226                    | -1.47 (-2.03 to -0.92)      |
| Placebo vs. Simvastatin_moderate                | 6                     | 537                    | -1.88 (-2.29 to -1.47)      |
| Pravastatin_low vs. Pravastatin_moderate        | 1                     | 53                     | 0.10 (-2.07 to 2.27)        |
| Pravastatin_low vs. Rosuvastatin_high           | 1                     | 1059                   | -0.67 (-2.36 to 1.03)       |
| Pravastatin_low vs. Rosuvastatin_moderate       | 1                     | 75                     | -1.25 (-1.59 to -0.90)      |
| Pravastatin_low vs. Simvastatin_low             | 1                     | 159                    | -0.71 (-1.50 to 0.09)       |
| Pravastatin_low vs. Simvastatin_moderate        | 2                     | 1149                   | -0.06 (-0.44 to 0.32)       |

|                                             |   |      |                       |
|---------------------------------------------|---|------|-----------------------|
| Rosuvastatin_high vs. Rosuvastatin_low      | 1 | 94   | 0.83 (-1.38 to 3.03)  |
| Rosuvastatin_high vs. Rosuvastatin_moderate | 1 | 95   | 0.41 (-1.55 to 2.38)  |
| Rosuvastatin_high vs. Simvastatin_moderate  | 1 | 1081 | -0.46 (-2.32 to 1.39) |
| Rosuvastatin_low vs. Rosuvastatin_moderate  | 1 | 95   | 0.41 (-1.85 to 2.67)  |
| Simvastatin_high vs. Simvastatin_low        | 1 | 61   | 0.65 (0.21 to 1.08)   |
| Simvastatin_high vs. Simvastatin_moderate   | 2 | 110  | 0.41 (-0.02 to 0.84)  |
| Simvastatin_low vs. Simvastatin_moderate    | 1 | 61   | 0.23 (-0.15 to 0.62)  |

## Appendix 7: Inconsistency Analysis

### Main Intensity model for non-HDL-C:

| Comparison                                  | P-value  | MD and 95% CrI      |
|---------------------------------------------|----------|---------------------|
| Atorvastatin_high vs. Atorvastatin_low      | 0.216    |                     |
| - direct                                    |          | 0.11 (-0.44, 0.76)  |
| - indirect                                  |          | 0.86 (-0.16, 1.8)   |
| - network                                   |          | 0.31 (-0.18, 0.83)  |
| Atorvastatin_high vs. Atorvastatin_moderate | 0.85995  |                     |
| - direct                                    |          | 0.16 (-0.30, 0.61)  |
| - indirect                                  |          | 0.025 (-1.4, 1.4)   |
| - network                                   |          | 0.14 (-0.30, 0.57)  |
| Atorvastatin_high vs. Placebo               | 0.360325 |                     |
| - direct                                    |          | 2.4 (1.7, 3.1)      |
| - indirect                                  |          | 2.0 (1.3, 2.7)      |
| - network                                   |          | 2.2 (1.7, 2.7)      |
| Atorvastatin_high vs. Rosuvastatin_high     | 0.558    |                     |
| - direct                                    |          | -0.96 (-4.1, 2.1)   |
| - indirect                                  |          | 0.023 (-1.2, 1.2)   |
| - network                                   |          | -0.11 (-1.2, 1.0)   |
| Atorvastatin_high vs. Simvastatin_moderate  | 0.5655   |                     |
| - direct                                    |          | 1.2 (-1.4, 3.7)     |
| - indirect                                  |          | 0.43 (-0.22, 1.0)   |
| - network                                   |          | 0.46 (-0.15, 1.1)   |
| Atorvastatin_low vs. Atorvastatin_moderate  | 0.44235  |                     |
| - direct                                    |          | -0.14 (-0.73, 0.37) |
| - indirect                                  |          | -0.57 (-1.5, 0.42)  |
| - network                                   |          | -0.18 (-0.66, 0.28) |
| Atorvastatin_low vs. Pravastatin_low        | 0.688475 |                     |
| - direct                                    |          | 0.35 (-1.8, 2.5)    |
| - indirect                                  |          | 0.80 (0.15, 1.4)    |

|                                                 |               |                      |
|-------------------------------------------------|---------------|----------------------|
| - network                                       |               | 0.77 (0.15, 1.4)     |
| Atorvastatin_low vs. Rosuvastatin_high          | 0.7556        |                      |
| - direct                                        |               | -0.34 (-2.2, 1.5)    |
| - indirect                                      |               | -0.73 (-2.4, 0.97)   |
| - network                                       |               | -0.43 (-1.6, 0.70)   |
| Atorvastatin_low vs. Simvastatin_low            | 0.2964        |                      |
| - direct                                        |               | -0.027 (-0.74, 0.68) |
| - indirect                                      |               | 0.52 (-0.28, 1.2)    |
| - network                                       |               | 0.22 (-0.33, 0.73)   |
| Atorvastatin_low vs. Simvastatin_moderate       | 0.921125      |                      |
| - direct                                        |               | 0.21 (-1.5, 1.9)     |
| - indirect                                      |               | 0.12 (-0.60, 0.78)   |
| - network                                       |               | 0.15 (-0.50, 0.75)   |
| Atorvastatin_moderate vs. Placebo               | 0.588575      |                      |
| - direct                                        |               | 2.0 (1.5, 2.5)       |
| - indirect                                      |               | 2.2 (1.6, 2.7)       |
| - network                                       |               | 2.1 (1.6, 2.5)       |
| Atorvastatin_moderate vs. Pravastatin_low       | <b>0.0709</b> |                      |
| - direct                                        |               | 1.3 (0.68, 1.9)      |
| - indirect                                      |               | 0.36 (-0.38, 1.2)    |
| - network                                       |               | 0.95 (0.46, 1.4)     |
| Atorvastatin_moderate vs. Rosuvastatin_high     | 0.734925      |                      |
| - direct                                        |               | -0.13 (-2.1, 1.9)    |
| - indirect                                      |               | -0.57 (-2.2, 1.1)    |
| - network                                       |               | -0.25 (-1.3, 0.85)   |
| Atorvastatin_moderate vs. Rosuvastatin_moderate | 0.627325      |                      |
| - direct                                        |               | -0.23 (-1.1, 0.63)   |
| - indirect                                      |               | 0.33 (-1.8, 2.4)     |
| - network                                       |               | -0.21 (-0.91, 0.53)  |
| Atorvastatin_moderate vs. Simvastatin_low       | 0.3247        |                      |
| - direct                                        |               | 0.80 (-0.16, 1.7)    |
| - indirect                                      |               | 0.24 (-0.44, 0.89)   |

|                                                |          |                    |
|------------------------------------------------|----------|--------------------|
| - network                                      |          | 0.39 (-0.13, 0.92) |
| Atorvastatin_moderate vs. Simvastatin_moderate | 0.7116   |                    |
| - direct                                       |          | 0.59 (-0.94, 2.1)  |
| - indirect                                     |          | 0.28 (-0.34, 0.88) |
| - network                                      |          | 0.32 (-0.22, 0.87) |
| Placebo vs. Pravastatin_low                    | 0.870725 |                    |
| - direct                                       |          | -1.0 (-1.6, -0.45) |
| - indirect                                     |          | -1.1 (-2.0, -0.25) |
| - network                                      |          | -1.1 (-1.6, -0.65) |
| Placebo vs. Rosuvastatin_high                  | 0.83325  |                    |
| - direct                                       |          | -2. (-4.4, 0.49)   |
| - indirect                                     |          | -2.3 (-3.5, -0.97) |
| - network                                      |          | -2.3 (-3.4, -1.2)  |
| Placebo vs. Rosuvastatin_moderate              | 0.593525 |                    |
| - direct                                       |          | -1.6 (-4.1, 0.81)  |
| - indirect                                     |          | -2.3 (-3.2, -1.5)  |
| - network                                      |          | -2.3 (-3.0, -1.5)  |
| Placebo vs. Simvastatin_high                   | 0.7958   |                    |
| - direct                                       |          | -2.4 (-3.3, -1.4)  |
| - indirect                                     |          | -2. (-4.7, 0.70)   |
| - network                                      |          | -2.3 (-3.2, -1.5)  |
| Placebo vs. Simvastatin_low                    | 0.179875 |                    |
| - direct                                       |          | -1.5 (-2.1, -0.82) |
| - indirect                                     |          | -2.2 (-3.0, -1.3)  |
| - network                                      |          | -1.7 (-2.2, -1.2)  |
| Placebo vs. Simvastatin_moderate               | 0.4656   |                    |
| - direct                                       |          | -1.9 (-2.4, -1.4)  |
| - indirect                                     |          | -1.4 (-2.6, -0.24) |
| - network                                      |          | -1.7 (-2.2, -1.3)  |
| Pravastatin_low vs. Rosuvastatin_high          | 0.5029   |                    |
| - direct                                       |          | -0.70 (-2.6, 1.2)  |
| - indirect                                     |          | -1.5 (-3.2, 0.13)  |



|                                             |                 |                      |
|---------------------------------------------|-----------------|----------------------|
| - network                                   |                 | -1.2 (-2.3, -0.068)  |
| Pravastatin_low vs. Rosuvastatin_moderate   | <b>0.567575</b> |                      |
| - direct                                    |                 | -1.2 (-2.1, -0.39)   |
| - indirect                                  |                 | -0.58 (-2.7, 1.6)    |
| - network                                   |                 | -1.2 (-1.9, -0.43)   |
| Pravastatin_low vs. Simvastatin_low         | <b>0.712925</b> |                      |
| - direct                                    |                 | -0.71 (-1.7, 0.30)   |
| - indirect                                  |                 | -0.49 (-1.1, 0.14)   |
| - network                                   |                 | -0.55 (-1.2, 0.039)  |
| Pravastatin_low vs. Simvastatin_moderate    | <b>0.030675</b> |                      |
| - direct                                    |                 | -0.061 (-0.76, 0.64) |
| - indirect                                  |                 | -1.2 (-1.9, -0.47)   |
| - network                                   |                 | -0.62 (-1.2, -0.085) |
| Rosuvastatin_high vs. Rosuvastatin_moderate | <b>0.6747</b>   |                      |
| - direct                                    |                 | 0.46 (-1.7, 2.5)     |
| - indirect                                  |                 | -0.079 (-1.5, 1.4)   |
| - network                                   |                 | 0.043 (-1.2, 1.2)    |
| Rosuvastatin_high vs. Simvastatin_moderate  | <b>0.742825</b> |                      |
| - direct                                    |                 | 0.47 (-1.5, 2.5)     |
| - indirect                                  |                 | 0.90 (-0.85, 2.6)    |
| - network                                   |                 | 0.57 (-0.56, 1.7)    |
| Simvastatin_high vs. Simvastatin_low        | <b>0.8074</b>   |                      |
| - direct                                    |                 | 0.64 (-0.24, 1.5)    |
| - indirect                                  |                 | 0.29 (-2.4, 3.0)     |
| - network                                   |                 | 0.59 (-0.16, 1.4)    |
| Simvastatin_low vs. Simvastatin_moderate    | <b>0.606875</b> |                      |
| - direct                                    |                 | -0.23 (-1.1, 0.65)   |
| - indirect                                  |                 | 0.066 (-0.78, 0.85)  |
| - network                                   |                 | -0.069 (-0.65, 0.50) |

CrI: credible interval

**Patient Risk Adjusted Model for non-HDL-C:**

| <b>Comparison</b>                             | <b>P-value</b> | <b>MD and 95% CrI</b> |
|-----------------------------------------------|----------------|-----------------------|
| Atorvastatin_high_HR vs. Atorvastatin_low_HR  | 0.8215         |                       |
| - direct                                      |                | 0.94 (-1.8, 3.8)      |
| - indirect                                    |                | 1.5 (-2.9, 5.9)       |
| - network                                     |                | 0.92 (-1.2, 3.2)      |
| Atorvastatin_high_HR vs. Atorvastatin_mod_HR  | 0.619          |                       |
| - direct                                      |                | 0.35 (-2.3, 3.0)      |
| - indirect                                    |                | 1.5 (-2.3, 4.8)       |
| - network                                     |                | 0.79 (-1.2, 2.7)      |
| Atorvastatin_high_HR vs. Placebo              | 0.653          |                       |
| - direct                                      |                | 2.4 (-0.75, 5.1)      |
| - indirect                                    |                | 1.3 (-1.8, 4.6)       |
| - network                                     |                | 2. (0.052, 4.2)       |
| Atorvastatin_high_LR vs. Atorvastatin_low_LR  | 0.20475        |                       |
| - direct                                      |                | 0.081 (-0.50, 0.75)   |
| - indirect                                    |                | 0.88 (-0.23, 1.9)     |
| - network                                     |                | 0.29 (-0.25, 0.85)    |
| Atorvastatin_high_LR vs. Atorvastatin_mod_LR  | 0.6185         |                       |
| - direct                                      |                | 0.15 (-0.31, 0.59)    |
| - indirect                                    |                | -0.24 (-1.7, 1.3)     |
| - network                                     |                | 0.10 (-0.37, 0.54)    |
| Atorvastatin_high_LR vs. Placebo              | 0.465          |                       |
| - direct                                      |                | 2.4 (1.6, 3.2)        |
| - indirect                                    |                | 2.0 (1.2, 2.9)        |
| - network                                     |                | 2.2 (1.7, 2.7)        |
| Atorvastatin_high_LR vs. Rosuvastatin_high_LR | 0.53725        |                       |
| - direct                                      |                | -0.95 (-3.8, 2.1)     |
| - indirect                                    |                | 0.028 (-1.1, 1.3)     |
| - network                                     |                | -0.14 (-1.3, 0.98)    |
| Atorvastatin_low_HR vs. Atorvastatin_mod_HR   | 0.7395         |                       |

|                                              |         |                       |
|----------------------------------------------|---------|-----------------------|
| - direct                                     |         | -0.62 (-3.5, 2.7)     |
| - indirect                                   |         | 0.0025 (-2.4, 2.3)    |
| - network                                    |         | -0.17 (-1.9, 1.6)     |
| Atorvastatin_low_HR vs. Simvastatin_low_HR   | 0.8635  |                       |
| - direct                                     |         | -0.18 (-1.8, 1.5)     |
| - indirect                                   |         | -0.51 (-4.0, 2.6)     |
| - network                                    |         | -0.21 (-1.6, 1.2)     |
| Atorvastatin_low_LR vs. Atorvastatin_mod_LR  | 0.37075 |                       |
| - direct                                     |         | -0.13 (-0.74, 0.43)   |
| - indirect                                   |         | -0.65 (-1.8, 0.45)    |
| - network                                    |         | -0.19 (-0.73, 0.30)   |
| Atorvastatin_low_LR vs. Pravastatin_low_LR   | 0.66075 |                       |
| - direct                                     |         | 0.33 (-1.8, 2.5)      |
| - indirect                                   |         | 0.83 (0.15, 1.5)      |
| - network                                    |         | 0.80 (0.16, 1.4)      |
| Atorvastatin_low_LR vs. Rosuvastatin_high_LR | 0.802   |                       |
| - direct                                     |         | -0.28 (-2.1, 1.7)     |
| - indirect                                   |         | -0.58 (-2.4, 1.2)     |
| - network                                    |         | -0.43 (-1.6, 0.69)    |
| Atorvastatin_low_LR vs. Simvastatin_low_LR   | 0.2685  |                       |
| - direct                                     |         | 0.00063 (-0.87, 0.84) |
| - indirect                                   |         | 0.64 (-0.24, 1.5)     |
| - network                                    |         | 0.30 (-0.31, 0.91)    |
| Atorvastatin_low_LR vs. Simvastatin_mod_LR   | 0.98525 |                       |
| - direct                                     |         | 0.18 (-2.0, 2.5)      |
| - indirect                                   |         | 0.17 (-0.60, 0.87)    |
| - network                                    |         | 0.17 (-0.52, 0.85)    |
| Atorvastatin_mod_HR vs. Placebo              | 0.663   |                       |
| - direct                                     |         | 0.76 (-1.1, 2.8)      |
| - indirect                                   |         | 1.7 (-2., 5.2)        |
| - network                                    |         | 1.2 (-0.51, 3.2)      |
| Atorvastatin_mod_HR vs. Simvastatin_low_HR   | 0.8685  |                       |

|                                              |         |                     |
|----------------------------------------------|---------|---------------------|
| - direct                                     |         | -0.12 (-1.8, 1.6)   |
| - indirect                                   |         | 0.21 (-3.1, 3.3)    |
| - network                                    |         | -0.040 (-1.5, 1.5)  |
| Atorvastatin_mod_LR vs. Placebo              | 0.72325 |                     |
| - direct                                     |         | 2.1 (1.5, 2.6)      |
| - indirect                                   |         | 2.2 (1.6, 2.8)      |
| - network                                    |         | 2.1 (1.7, 2.6)      |
| Atorvastatin_mod_LR vs. Pravastatin_low_LR   | 0.1185  |                     |
| - direct                                     |         | 1.3 (0.63, 1.9)     |
| - indirect                                   |         | 0.40 (-0.42, 1.3)   |
| - network                                    |         | 0.98 (0.49, 1.5)    |
| Atorvastatin_mod_LR vs. Rosuvastatin_high_LR | 0.74975 |                     |
| - direct                                     |         | -0.088 (-2.1, 1.9)  |
| - indirect                                   |         | -0.49 (-2.1, 1.1)   |
| - network                                    |         | -0.24 (-1.4, 0.84)  |
| Atorvastatin_mod_LR vs. Rosuvastatin_mod_LR  | 0.5585  |                     |
| - direct                                     |         | -0.24 (-1.2, 0.70)  |
| - indirect                                   |         | 0.51 (-1.8, 2.6)    |
| - network                                    |         | -0.19 (-0.89, 0.59) |
| Atorvastatin_mod_LR vs. Simvastatin_low_LR   | 0.17725 |                     |
| - direct                                     |         | 1.2 (0.032, 2.4)    |
| - indirect                                   |         | 0.27 (-0.45, 1.0)   |
| - network                                    |         | 0.49 (-0.095, 1.1)  |
| Atorvastatin_mod_LR vs. Simvastatin_mod_LR   | 0.99425 |                     |
| - direct                                     |         | 0.34 (-1.7, 2.4)    |
| - indirect                                   |         | 0.37 (-0.28, 1.0)   |
| - network                                    |         | 0.37 (-0.23, 0.97)  |
| Placebo vs. Pravastatin_low_LR               | 0.765   |                     |
| - direct                                     |         | -1.0 (-1.7, -0.42)  |
| - indirect                                   |         | -1.2 (-2.2, -0.28)  |
| - network                                    |         | -1.1 (-1.6, -0.62)  |
| Placebo vs. Rosuvastatin_high_LR             | 0.841   |                     |

|                                             |              |                    |
|---------------------------------------------|--------------|--------------------|
| - direct                                    |              | -2.4 (-4.4, 0.45)  |
| - indirect                                  |              | -2.3 (-3.6, -0.98) |
| - network                                   |              | -2.4 (-3.4, -1.3)  |
| Placebo vs. Rosuvastatin_mod_LR             | 0.5605       |                    |
| - direct                                    |              | -1.6 (-4.1, 0.94)  |
| - indirect                                  |              | -2.4 (-3.3, -1.6)  |
| - network                                   |              | -2.3 (-3.1, -1.5)  |
| Placebo vs. Simvastatin_high_LR             | 0.8685       |                    |
| - direct                                    |              | -2.4 (-3.3, -1.4)  |
| - indirect                                  |              | -2.1 (-4.7, 0.49)  |
| - network                                   |              | -2.2 (-3.0, -1.5)  |
| Placebo vs. Simvastatin_low_LR              | 0.2715       |                    |
| - direct                                    |              | -1.5 (-2.1, -0.77) |
| - indirect                                  |              | -2.2 (-3.2, -0.96) |
| - network                                   |              | -1.6 (-2.2, -1.1)  |
| Placebo vs. Simvastatin_mod_LR              | 0.72825      |                    |
| - direct                                    |              | -1.9 (-2.4, -1.4)  |
| - indirect                                  |              | -1.6 (-3.0, -0.18) |
| - network                                   |              | -1.8 (-2.2, -1.3)  |
| Pravastatin_low_LR vs. Rosuvastatin_high_LR | 0.5275       |                    |
| - direct                                    |              | -0.70 (-2.7, 1.2)  |
| - indirect                                  |              | -1.5 (-3.2, 0.12)  |
| - network                                   |              | -1.2 (-2.3, -0.15) |
| Pravastatin_low_LR vs. Rosuvastatin_mod_LR  | 0.5975       |                    |
| - direct                                    |              | -1.2 (-2.1, -0.31) |
| - indirect                                  |              | -0.62 (-2.8, 1.7)  |
| - network                                   |              | -1.2 (-1.9, -0.41) |
| Pravastatin_low_LR vs. Simvastatin_low_LR   | 0.635        |                    |
| - direct                                    |              | -0.69 (-1.7, 0.33) |
| - indirect                                  |              | -0.41 (-1.1, 0.26) |
| - network                                   |              | -0.49 (-1.1, 0.13) |
| Pravastatin_low_LR vs. Simvastatin_mod_LR   | <b>0.035</b> |                    |

|                                              |         |                      |
|----------------------------------------------|---------|----------------------|
| - direct                                     |         | -0.061 (-0.77, 0.66) |
| - indirect                                   |         | -1.2 (-2.4, -0.46)   |
| - network                                    |         | -0.62 (-1.2, -0.079) |
| Rosuvastatin_high_LR vs. Rosuvastatin_mod_LR | 0.66925 |                      |
| - direct                                     |         | 0.41 (-1.7, 2.4)     |
| - indirect                                   |         | -0.099 (-1.6, 1.4)   |
| - network                                    |         | 0.052 (-1.1, 1.3)    |
| Rosuvastatin_high_LR vs. Simvastatin_mod_LR  | 0.70075 |                      |
| - direct                                     |         | 0.41 (-1.6, 2.5)     |
| - indirect                                   |         | 0.96 (-0.71, 2.7)    |
| - network                                    |         | 0.62 (-0.54, 1.7)    |
| Simvastatin_high_LR vs. Simvastatin_low_LR   | 0.892   |                      |
| - direct                                     |         | 0.64 (-0.29, 1.6)    |
| - indirect                                   |         | 0.45 (-2.1, 3.1)     |
| - network                                    |         | 0.63 (-0.20, 1.5)    |
| Simvastatin_low_LR vs. Simvastatin_mod_LR    | 0.788   |                      |
| - direct                                     |         | -0.24 (-1.2, 0.71)   |
| - indirect                                   |         | -0.058 (-1.0, 0.84)  |
| - network                                    |         | -0.13 (-0.78, 0.48)  |

HR: high risk patients; LR: low-to-moderate risk patients.

**Main Intensity model for LDL-C:**

| <b>Comparison</b>                               | <b>P-value</b> | <b>MD and 95% CrI</b> |
|-------------------------------------------------|----------------|-----------------------|
| Atorvastatin_high vs. Atorvastatin_moderate     | 0.9045         |                       |
| - direct                                        |                | 0.17 (-0.16, 0.49)    |
| - indirect                                      |                | 0.13 (-0.50, 0.80)    |
| - network                                       |                | 0.18 (-0.12, 0.48)    |
| Atorvastatin_high vs. Placebo                   | 0.40375        |                       |
| - direct                                        |                | 1.6 (1.1, 2.1)        |
| -> indirect                                     |                | 1.3 (0.79, 1.8)       |
| -> network                                      |                | 1.4 (1.1, 1.8)        |
| Atorvastatin_high vs. Rosuvastatin_high         | 0.74975        |                       |
| - direct                                        |                | -0.42 (-1.3, 0.44)    |
| - indirect                                      |                | -0.23 (-1.1, 0.67)    |
| - network                                       |                | -0.33 (-0.94, 0.28)   |
| Atorvastatin_moderate vs. Pitavastatin_moderate | 0.88325        |                       |
| - direct                                        |                | 0.11 (-0.74, 0.98)    |
| - indirect                                      |                | 0.0099 (-0.95, 0.96)  |
| - network                                       |                | 0.067 (-0.56, 0.70)   |
| Atorvastatin_moderate vs. Placebo               | 0.08275        |                       |
| - direct                                        |                | 1.0 (0.60, 1.4)       |
| - indirect                                      |                | 1.5 (1.1, 1.9)        |
| - network                                       |                | 1.3 (0.95, 1.6)       |
| Atorvastatin_moderate vs. Pravastatin_low       | 0.29875        |                       |
| - direct                                        |                | 0.85 (0.044, 1.7)     |
| - indirect                                      |                | 0.36 (-0.084, 0.84)   |
| - network                                       |                | 0.49 (0.085, 0.89)    |
| Atorvastatin_moderate vs. Rosuvastatin_moderate | 0.979          |                       |
| - direct                                        |                | -0.19 (-1.0, 0.62)    |
| - indirect                                      |                | -0.21 (-1.0, 0.63)    |
| - network                                       |                | -0.28 (-0.82, 0.27)   |
| Atorvastatin_moderate vs. Simvastatin_low       | 0.538          |                       |

|                                                |         |                      |
|------------------------------------------------|---------|----------------------|
| - direct                                       |         | 0.12 (-0.72, 0.94)   |
| - indirect                                     |         | -0.22 (-1.0, 0.58)   |
| - network                                      |         | -0.066 (-0.63, 0.50) |
| Atorvastatin_moderate vs. Simvastatin_moderate | 0.22525 |                      |
| - direct                                       |         | 0.78 (-0.18, 1.8)    |
| - indirect                                     |         | 0.11 (-0.37, 0.59)   |
| - network                                      |         | 0.24 (-0.20, 0.68)   |
| Pitavastatin_moderate vs. Pravastatin_low      | 0.875   |                      |
| - direct                                       |         | 0.46 (-0.39, 1.3)    |
| - indirect                                     |         | 0.36 (-0.61, 1.3)    |
| - network                                      |         | 0.42 (-0.22, 1.0)    |
| Placebo vs. Pravastatin_low                    | 0.23    |                      |
| - direct                                       |         | -0.89 (-1.3, -0.50)  |
| - indirect                                     |         | -0.42 (-1.1, 0.27)   |
| - network                                      |         | -0.76 (-1.1, -0.43)  |
| Placebo vs. Rosuvastatin_high                  | 0.6775  |                      |
| - direct                                       |         | -1.6 (-2.5, -0.73)   |
| - indirect                                     |         | -1.9 (-2.8, -0.92)   |
| - network                                      |         | -1.8 (-2.4, -1.1)    |
| Placebo vs. Rosuvastatin_moderate              | 0.64725 |                      |
| - direct                                       |         | -1.4 (-2.3, -0.52)   |
| - indirect                                     |         | -1.6 (-2.4, -0.86)   |
| - network                                      |         | -1.5 (-2.1, -0.99)   |
| Placebo vs. Simvastatin_low                    | 0.397   |                      |
| - direct                                       |         | -1.6 (-2.4, -0.81)   |
| - indirect                                     |         | -1.1 (-2.0, -0.21)   |
| - network                                      |         | -1.3 (-1.9, -0.75)   |
| Placebo vs. Simvastatin_moderate               | 0.1305  |                      |
| - direct                                       |         | -1.2 (-1.6, -0.81)   |
| - indirect                                     |         | -0.37 (-1.4, 0.62)   |
| - network                                      |         | -1.0 (-1.4, -0.64)   |
| Pravastatin_low vs. Rosuvastatin_moderate      | 0.4525  |                      |



|                                             |         |                      |
|---------------------------------------------|---------|----------------------|
| - direct                                    |         | -1.0 (-1.9, -0.20)   |
| - indirect                                  |         | -0.58 (-1.5, 0.29)   |
| - network                                   |         | -0.76 (-1.3, -0.19)  |
| Pravastatin_low vs. Simvastatin_moderate    | 0.62425 |                      |
| - direct                                    |         | -0.084 (-0.88, 0.73) |
| - indirect                                  |         | -0.31 (-0.86, 0.25)  |
| - network                                   |         | -0.25 (-0.73, 0.23)  |
| Rosuvastatin_high vs. Rosuvastatin_moderate | 0.99325 |                      |
| - direct                                    |         | 0.23 (-0.66, 1.1)    |
| - indirect                                  |         | 0.24 (-0.99, 1.4)    |
| - network                                   |         | 0.22 (-0.44, 0.91)   |
| Simvastatin_low vs. Simvastatin_moderate    | 0.87075 |                      |
| - direct                                    |         | 0.25 (-0.57, 1.1)    |
| - indirect                                  |         | 0.16 (-0.79, 1.1)    |
| - network                                   |         | 0.30 (-0.29, 0.90)   |

## Appendix 8: Heterogeneity Assessment

### Global heterogeneity statistics for each network model of non-HDL-C:

- **Statin Agent and Intensity Model (main model)**
  - Network  $\tau^2$  (from NMA in all trials, n=36) = 0 (0 to 0.014)
  - Network  $I^2$  (from NMA in all trials, n=36) = 0 (0 to 38) %
  - DIC = 132.98 (Dbar = 72.49; pD = 60.49)
  
- **Patient-Risk Adjusted Model**
  - Network  $\tau^2$  (from NMA in all trials, n=36) = 0.178 (0.097 to 0.307)
  - Network  $I^2$  (from NMA in all trials, n=36) = 12.1 (0 to 42) %
  - DIC = 142.97 (Dbar = 76.16; pD = 66.80)

### Global heterogeneity statistics for network model for LDL-C:

- Network  $\tau^2$  (from NMA in all trials, n=29) = 0 (0 to 0.049)
- Network  $I^2$  (from NMA in all trials, n=29) = 5 (0 to 35) %
- DIC = 141.56 (Dbar = 73.70; pD = 67.86)

### Heterogeneity score by each comparison for main model of non-HDL-C

| Treatment1            | Treatment2            | I <sup>2</sup> Pairwise | I <sup>2</sup> Network | I <sup>2</sup> Inconsistency (p-value) |
|-----------------------|-----------------------|-------------------------|------------------------|----------------------------------------|
| Atorvastatin_high     | Atorvastatin_low      | 40.4562303              | 65.15043               | 0.12418165                             |
| Atorvastatin_high     | Atorvastatin_moderate | 0                       | 0                      | 0.57929671                             |
| Atorvastatin_high     | Placebo               | 0                       | 0                      | 0.31080774                             |
| Atorvastatin_high     | Rosuvastatin_high     | NA                      | 0                      | 0.59711251                             |
| Atorvastatin_high     | Simvastatin_moderate  | NA                      | 0                      | 0.60256453                             |
| Atorvastatin_low      | Atorvastatin_moderate | 17.2586731              | 45.82898               | 0.46457183                             |
| Atorvastatin_low      | Pravastatin_low       | NA                      | 0                      | 0.78886846                             |
| Atorvastatin_low      | Rosuvastatin_high     | NA                      | 0                      | 0.92865905                             |
| Atorvastatin_low      | Simvastatin_low       | 0                       | 18.27955               | 0.26160298                             |
| Atorvastatin_low      | Simvastatin_moderate  | 0                       | 0                      | 0.99442574                             |
| Atorvastatin_moderate | Pitavastatin_moderate | NA                      | NA                     | NA                                     |
| Atorvastatin_moderate | Placebo               | 0                       | 0                      | 0.67018739                             |
| Atorvastatin_moderate | Pravastatin_low       | 0                       | 0                      | 0.51630449                             |
| Atorvastatin_moderate | Rosuvastatin_high     | NA                      | 0                      | 0.92681038                             |
| Atorvastatin_moderate | Rosuvastatin_moderate | NA                      | 0                      | 0.90146406                             |
| Atorvastatin_moderate | Simvastatin_low       | 0.9475435               | 0                      | 0.9907888                              |
| Atorvastatin_moderate | Simvastatin_moderate  | 0                       | 0                      | 0.75301716                             |
| Fluvastatin_low       | Placebo               | 0                       | 0                      | NA                                     |
| Fluvastatin_moderate  | Placebo               | NA                      | NA                     | NA                                     |
| Placebo               | Pravastatin_low       | 36.5829912              | 26.23744               | 0.58383781                             |
| Placebo               | Pravastatin_moderate  | NA                      | NA                     | NA                                     |
| Placebo               | Rosuvastatin_high     | NA                      | 0                      | 0.86566922                             |
| Placebo               | Rosuvastatin_low      | NA                      | NA                     | NA                                     |
| Placebo               | Rosuvastatin_moderate | NA                      | 0                      | 0.73904384                             |
| Placebo               | Simvastatin_high      | NA                      | 0                      | 0.80050655                             |

|                   |                       |            |          |                   |
|-------------------|-----------------------|------------|----------|-------------------|
| Placebo           | Simvastatin_low       | 31.4920912 | 25.44101 | 0.32659144        |
| Placebo           | Simvastatin_moderate  | 25.4612952 | 30.79731 | 0.18489863        |
| Pravastatin_low   | Pravastatin_moderate  | NA         | NA       | NA                |
| Pravastatin_low   | Rosuvastatin_high     | NA         | 0        | 0.60983497        |
| Pravastatin_low   | Rosuvastatin_moderate | NA         | 0        | 0.64728881        |
| Pravastatin_low   | Simvastatin_low       | NA         | 0        | 0.89182508        |
| Pravastatin_low   | Simvastatin_moderate  | 0          | 74.84326 | <b>0.04960713</b> |
| Rosuvastatin_high | Rosuvastatin_low      | NA         | NA       | NA                |
| Rosuvastatin_high | Rosuvastatin_moderate | NA         | 0        | 0.71751311        |
| Rosuvastatin_high | Simvastatin_moderate  | NA         | 0        | 0.9366882         |
| Rosuvastatin_low  | Rosuvastatin_moderate | NA         | NA       | NA                |
| Simvastatin_high  | Simvastatin_low       | NA         | 0        | 0.85089267        |
| Simvastatin_high  | Simvastatin_moderate  | 0          | 0        | NA                |
| Simvastatin_low   | Simvastatin_moderate  | NA         | 0        | 0.56516372        |

### Heterogeneity score Patient-Risk Adjusted Model of non-HDL-C

| Treatment1           | Treatment2           | I <sup>2</sup> Pairwise | I <sup>2</sup> Network | I <sup>2</sup> Inconsistency (p-value) |
|----------------------|----------------------|-------------------------|------------------------|----------------------------------------|
| Atorvastatin_high_HR | Atorvastatin_low_HR  | NA                      | 0                      | 0.94383981                             |
| Atorvastatin_high_HR | Atorvastatin_mod_HR  | NA                      | 0                      | 0.73232802                             |
| Atorvastatin_high_HR | Placebo              | NA                      | 0                      | 0.62779377                             |
| Atorvastatin_high_HR | Simvastatin_mod_HR   | NA                      | NA                     | NA                                     |
| Atorvastatin_high_LR | Atorvastatin_low_LR  | 58.9452122              | 70.220606              | 0.21975264                             |
| Atorvastatin_high_LR | Atorvastatin_mod_LR  | 0.9406801               | 7.046371               | 0.4877635                              |
| Atorvastatin_high_LR | Placebo              | 0                       | 0                      | 0.48233463                             |
| Atorvastatin_high_LR | Rosuvastatin_high_LR | NA                      | 0                      | 0.58493797                             |
| Atorvastatin_low_HR  | Atorvastatin_mod_HR  | NA                      | 0                      | 0.83074732                             |
| Atorvastatin_low_HR  | Simvastatin_low_HR   | NA                      | 0                      | 0.80727772                             |
| Atorvastatin_low_HR  | Simvastatin_mod_HR   | NA                      | NA                     | NA                                     |
| Atorvastatin_low_LR  | Atorvastatin_mod_LR  | 41.9470577              | 60.018533              | 0.50790953                             |
| Atorvastatin_low_LR  | Pravastatin_low_LR   | NA                      | 0                      | 0.78464995                             |
| Atorvastatin_low_LR  | Rosuvastatin_high_LR | NA                      | 0                      | 0.97022176                             |
| Atorvastatin_low_LR  | Simvastatin_low_LR   | NA                      | 72.413919              | 0.28914319                             |
| Atorvastatin_low_LR  | Simvastatin_mod_LR   | NA                      | 0                      | 0.95139504                             |
| Atorvastatin_mod_HR  | Pitavastatin_mod_HR  | NA                      | NA                     | NA                                     |
| Atorvastatin_mod_HR  | Placebo              | 0                       | 0                      | 0.71407786                             |
| Atorvastatin_mod_HR  | Simvastatin_low_HR   | NA                      | 0                      | 0.85262492                             |
| Atorvastatin_mod_HR  | Simvastatin_mod_HR   | NA                      | NA                     | NA                                     |
| Atorvastatin_mod_LR  | Placebo              | 0                       | 0                      | 0.70128405                             |
| Atorvastatin_mod_LR  | Pravastatin_low_LR   | 0                       | 0                      | 0.61672195                             |
| Atorvastatin_mod_LR  | Rosuvastatin_high_LR | NA                      | 0                      | 0.98681931                             |
| Atorvastatin_mod_LR  | Rosuvastatin_mod_LR  | NA                      | 0                      | 0.86724377                             |
| Atorvastatin_mod_LR  | Simvastatin_low_LR   | NA                      | 0                      | 0.53079951                             |
| Atorvastatin_mod_LR  | Simvastatin_mod_LR   | 0                       | 0                      | 0.90106026                             |
| Fluvastatin_low_HR   | Placebo              | NA                      | NA                     | NA                                     |
| Fluvastatin_low_LR   | Placebo              | NA                      | NA                     | NA                                     |
| Fluvastatin_mod_HR   | Placebo              | NA                      | NA                     | NA                                     |

|                      |                      |            |           |                   |
|----------------------|----------------------|------------|-----------|-------------------|
| Placebo              | Pravastatin_low_HR   | NA         | NA        | NA                |
| Placebo              | Pravastatin_low_LR   | 50.3621219 | 40.570719 | 0.52640849        |
| Placebo              | Pravastatin_mod_LR   | NA         | NA        | NA                |
| Placebo              | Rosuvastatin_high_LR | NA         | 0         | 0.82794859        |
| Placebo              | Rosuvastatin_low_LR  | NA         | NA        | NA                |
| Placebo              | Rosuvastatin_mod_LR  | NA         | 0         | 0.70878289        |
| Placebo              | Simvastatin_high_LR  | NA         | 0         | 0.79540918        |
| Placebo              | Simvastatin_low_LR   | 31.5269573 | 11.578625 | 0.42566386        |
| Placebo              | Simvastatin_mod_LR   | 25.1828725 | 23.418205 | 0.3023966         |
| Pravastatin_low_LR   | Pravastatin_mod_LR   | NA         | NA        | NA                |
| Pravastatin_low_LR   | Rosuvastatin_high_LR | NA         | 0         | 0.61234155        |
| Pravastatin_low_LR   | Rosuvastatin_mod_LR  | NA         | 0         | 0.7228183         |
| Pravastatin_low_LR   | Simvastatin_low_LR   | NA         | 0         | 0.80880007        |
| Pravastatin_low_LR   | Simvastatin_mod_LR   | 0          | 73.161289 | <b>0.07814566</b> |
| Rosuvastatin_high_LR | Rosuvastatin_low_LR  | NA         | NA        | NA                |
| Rosuvastatin_high_LR | Rosuvastatin_mod_LR  | NA         | 0         | 0.73962077        |
| Rosuvastatin_high_LR | Simvastatin_mod_LR   | NA         | 0         | 0.88101499        |
| Rosuvastatin_low_LR  | Rosuvastatin_mod_LR  | NA         | NA        | NA                |
| Simvastatin_high_LR  | Simvastatin_low_LR   | NA         | 0         | 0.95213573        |
| Simvastatin_high_LR  | Simvastatin_mod_LR   | 0          | 0         | NA                |
| Simvastatin_low_LR   | Simvastatin_mod_LR   | NA         | 0         | 0.76579572        |

## Appendix 9: Secondary outcomes (TC, Discontinuations and MACE)

### Total cholesterol

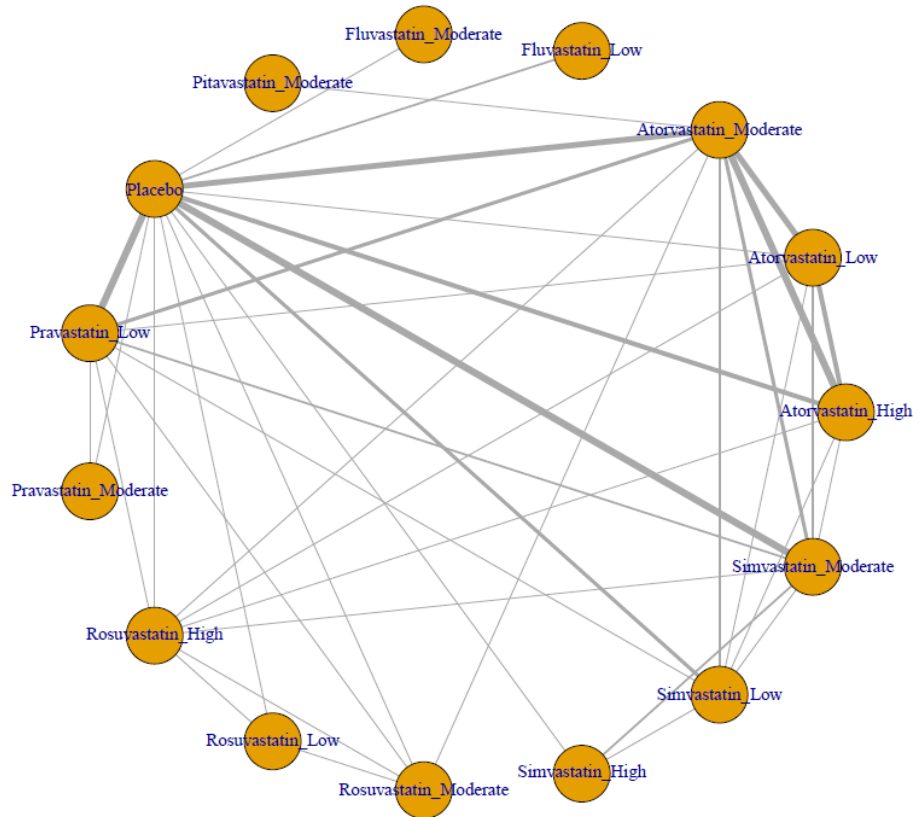

#### Compared with Placebo

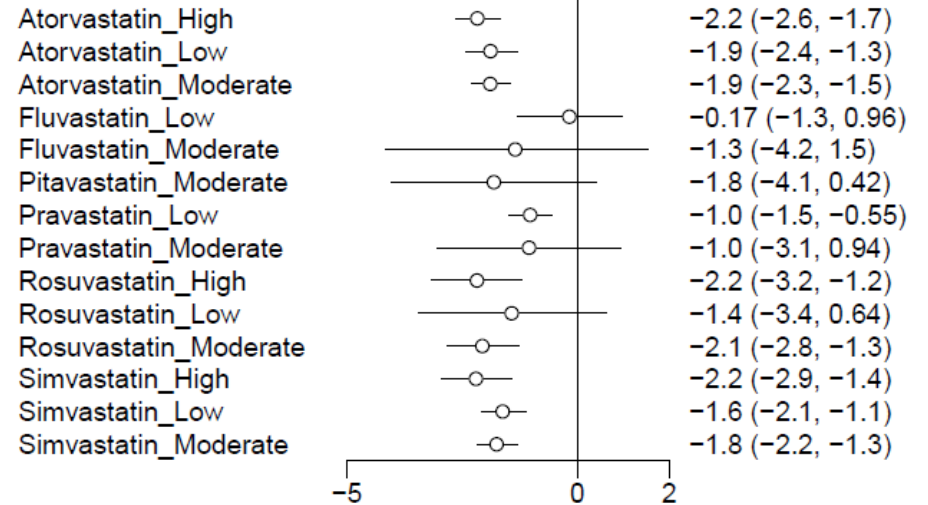

- SUCRA: 1<sup>st</sup> = Atorvastatin High; 2<sup>nd</sup> = Simvastatin High; 3<sup>rd</sup> = Rosuvastatin High
- I<sup>2</sup> = 0%
- One inconsistency detected between Pravastatin low vs. Simvastatin moderate (**P=0.0558**).

## Discontinuations due to AE

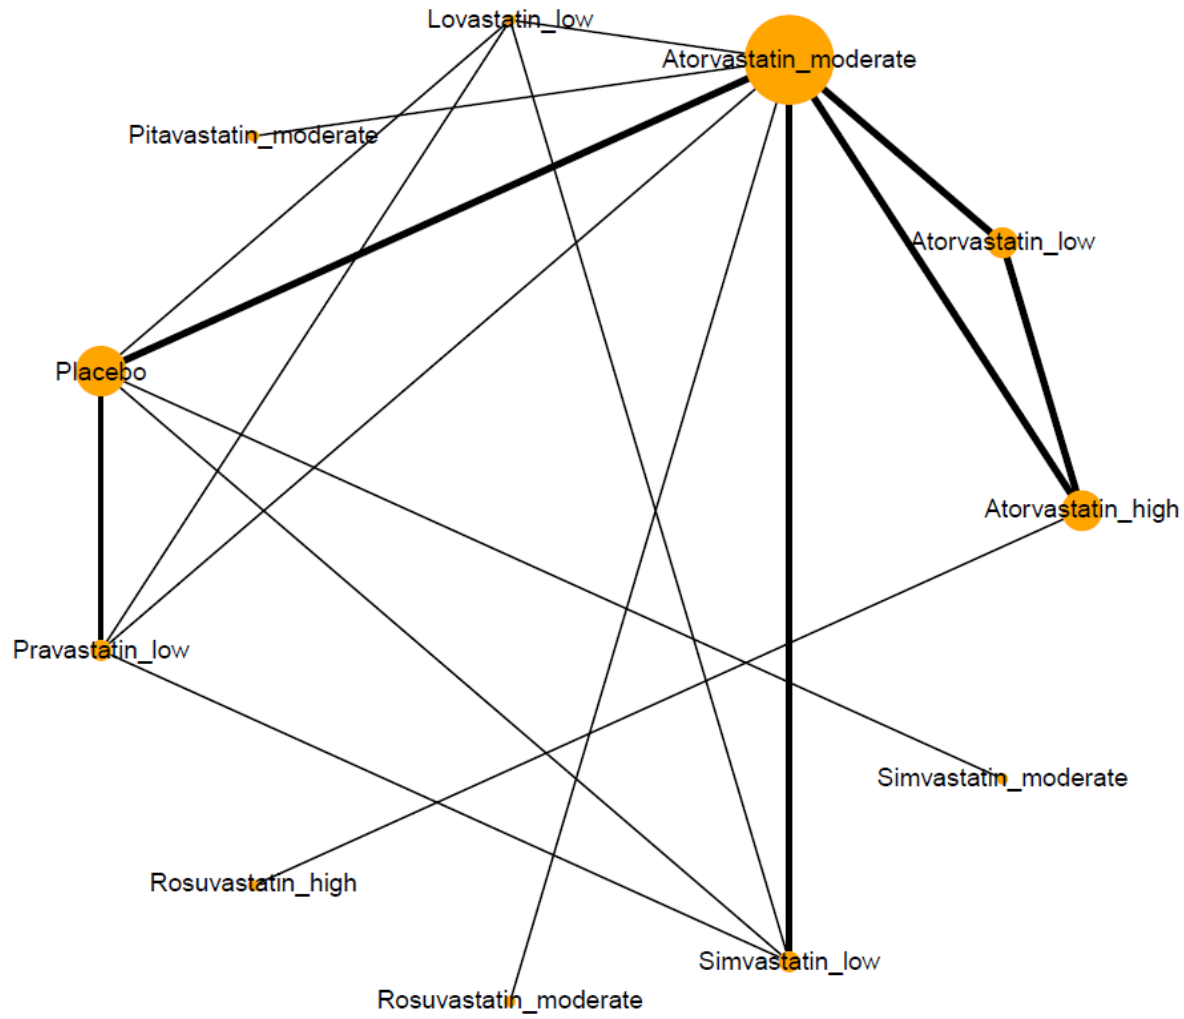



### Raw meta-data for discontinuations due to adverse events

| Study              | Statin Intensity      | Number of Discontinuations | Total Number of Patients |
|--------------------|-----------------------|----------------------------|--------------------------|
| Behounek 1994      | Pravastatin_low       | 2                          | 167                      |
| Behounek 1994      | Placebo               | 0                          | 158                      |
| Betteridge 2007    | Rosuvastatin_moderate | 15                         | 254                      |
| Betteridge 2007    | Atorvastatin_moderate | 13                         | 255                      |
| Chang 2013         | Atorvastatin_low      | 3                          | 52                       |
| Chang 2013         | Atorvastatin_moderate | 2                          | 52                       |
| Chang 2013         | Atorvastatin_high     | 2                          | 53                       |
| Colhoun 2004       | Atorvastatin_moderate | 122                        | 1428                     |
| Colhoun 2004       | Placebo               | 145                        | 1410                     |
| Ferrer-García 2008 | Atorvastatin_high     | 1                          | 17                       |
| Ferrer-García 2008 | Atorvastatin_moderate | 1                          | 61                       |
| Ferrer-García 2008 | Atorvastatin_low      | 0                          | 75                       |
| Gentile 2000       | Atorvastatin_moderate | 1                          | 84                       |
| Gentile 2000       | Pravastatin_low       | 1                          | 81                       |
| Gentile 2000       | Lovastatin_low        | 1                          | 80                       |
| Gentile 2000       | Simvastatin_low       | 0                          | 78                       |
| Gentile 2000       | Placebo               | 0                          | 86                       |
| Goldberg 2006      | Simvastatin_low       | 4                          | 494                      |
| Goldberg 2006      | Atorvastatin_moderate | 11                         | 735                      |
| Knopp 2006         | Atorvastatin_moderate | 33                         | 1211                     |
| Knopp 2006         | Placebo               | 38                         | 1199                     |
| Lewin 2004         | Simvastatin_moderate  | 10                         | 123                      |
| Lewin 2004         | Placebo               | 4                          | 130                      |
| Liu 2013           | Pitavastatin_moderate | 9                          | 112                      |
| Liu 2013           | Atorvastatin_moderate | 4                          | 113                      |
| Son 2013           | Atorvastatin_low      | 2                          | 185                      |
| Son 2013           | Atorvastatin_moderate | 2                          | 181                      |
| Son 2013           | Atorvastatin_high     | 1                          | 74                       |
| Wolffenbuttel 2005 | Rosuvastatin_high     | 10                         | 131                      |

|                    |                   |    |     |
|--------------------|-------------------|----|-----|
| Wolffenbuttel 2005 | Atorvastatin_high | 11 | 132 |
|--------------------|-------------------|----|-----|

Given there were only 12 studies that provided data on discontinuations and due to the rare event nature of the outcome, there is no such R/Stata package that are able to extend to the Peto odds ratio. Thus, we opted to analyse discontinuations using traditional pairwise meta-analysis approach and the results can be seen below.

**Discontinuations due to AEs were analysed with Peto odds ratio**

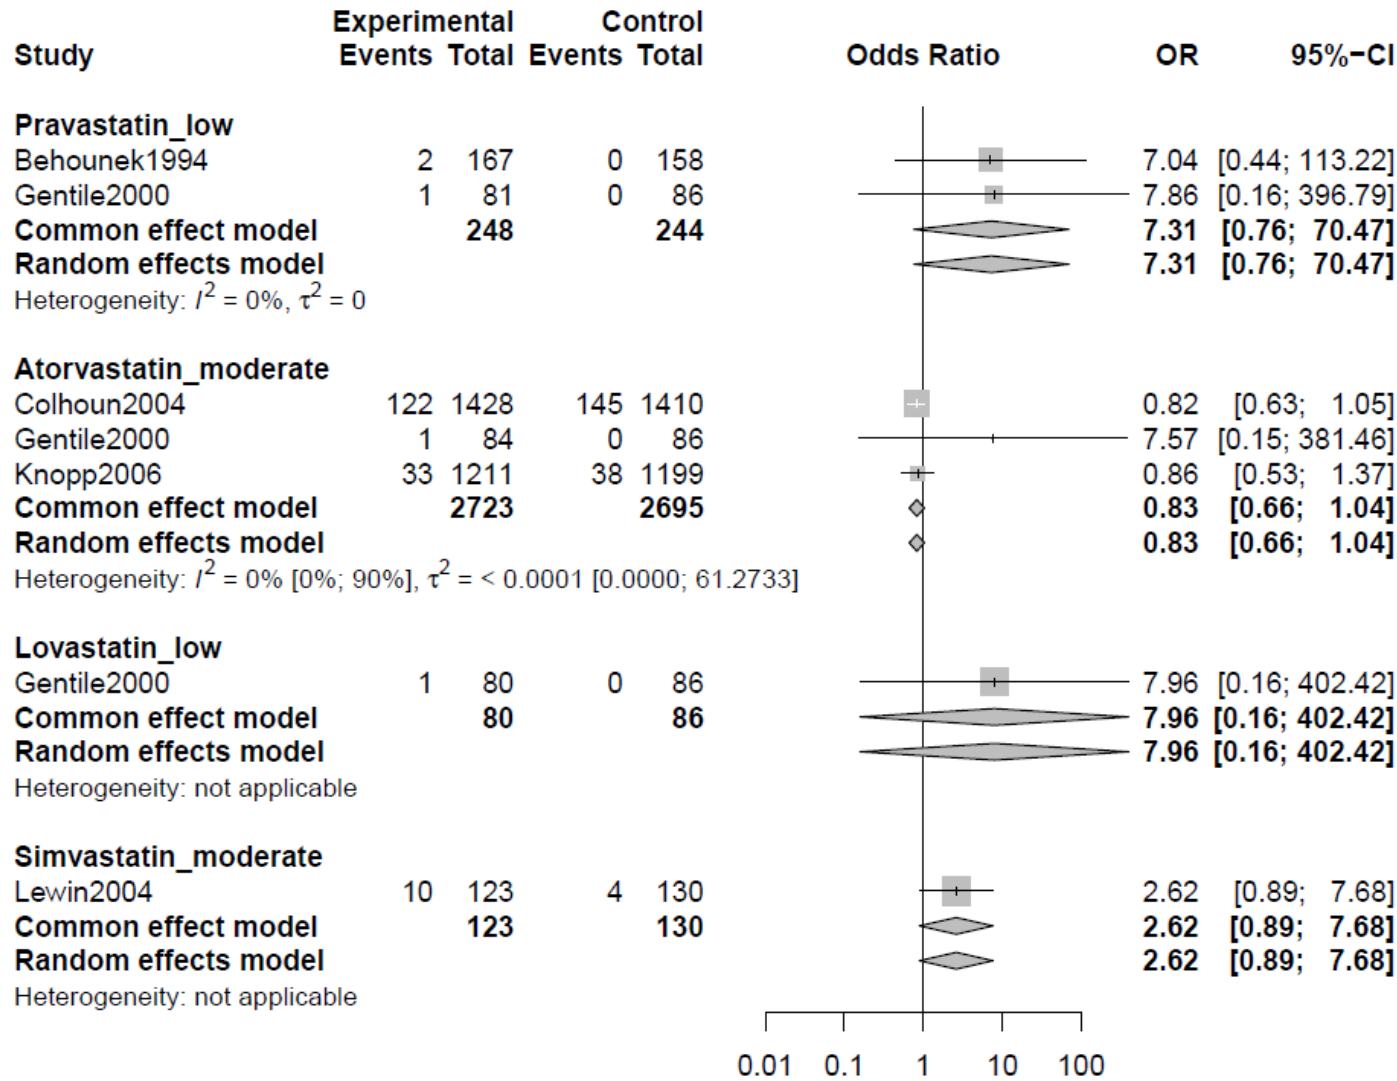

MACE outcomes

Non-Fatal Myocardial Fraction

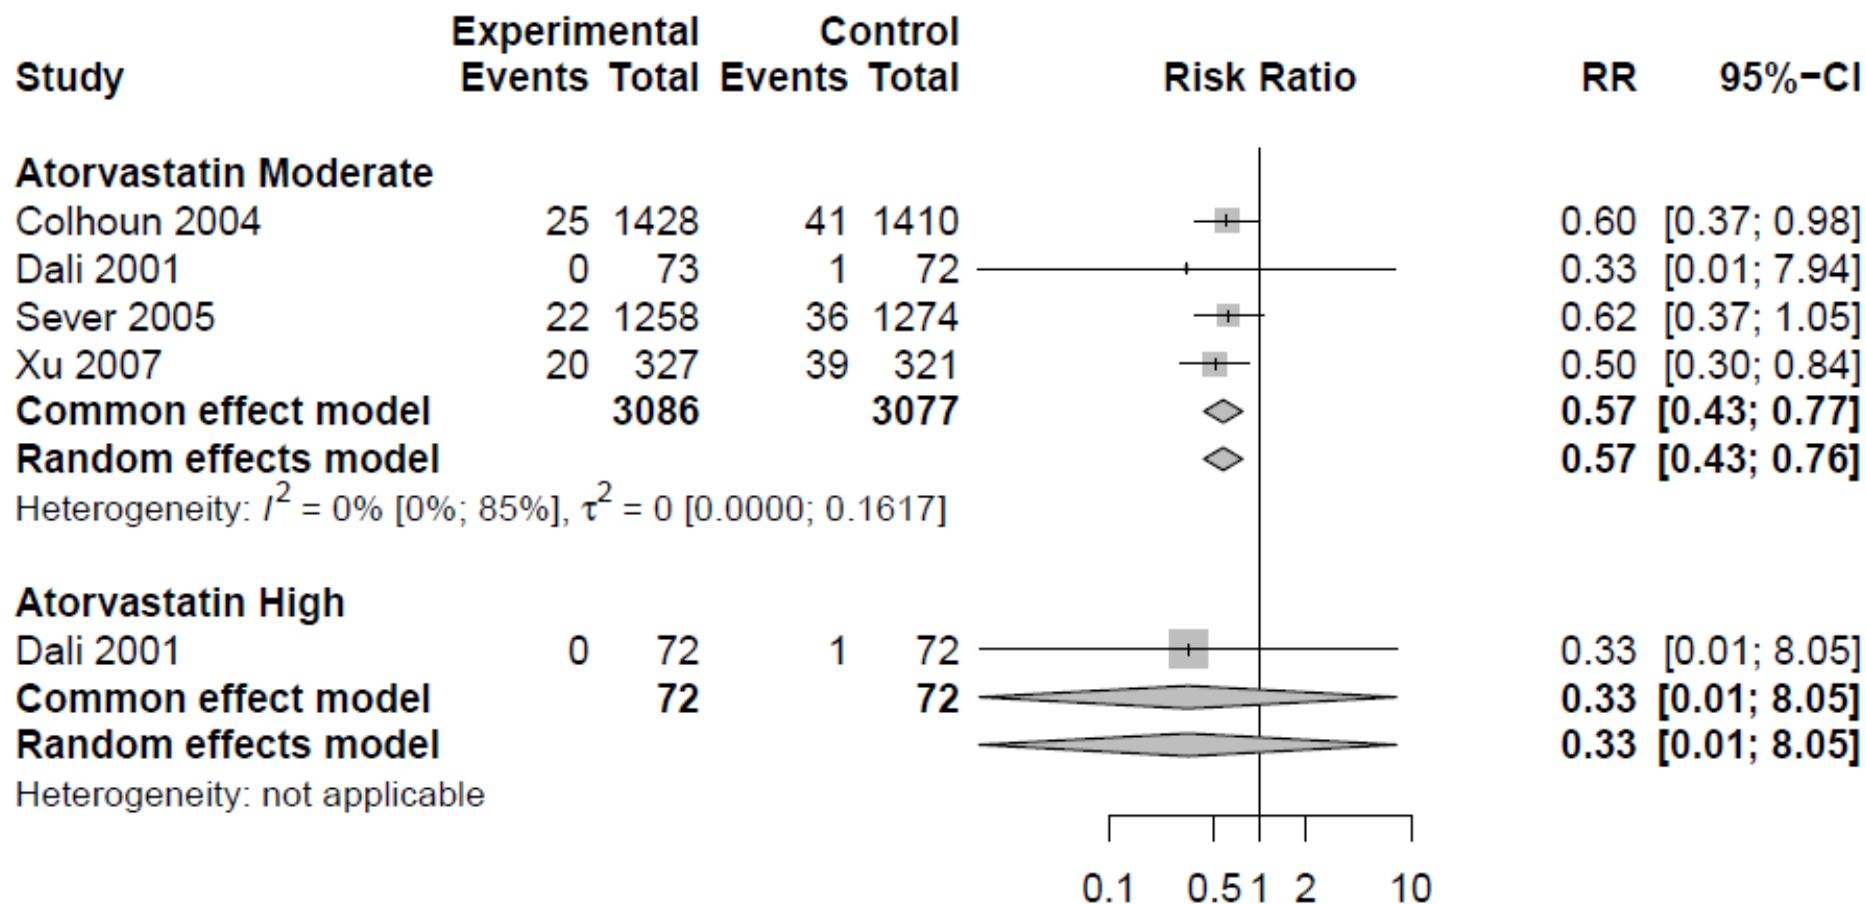

Non-Fatal Stroke

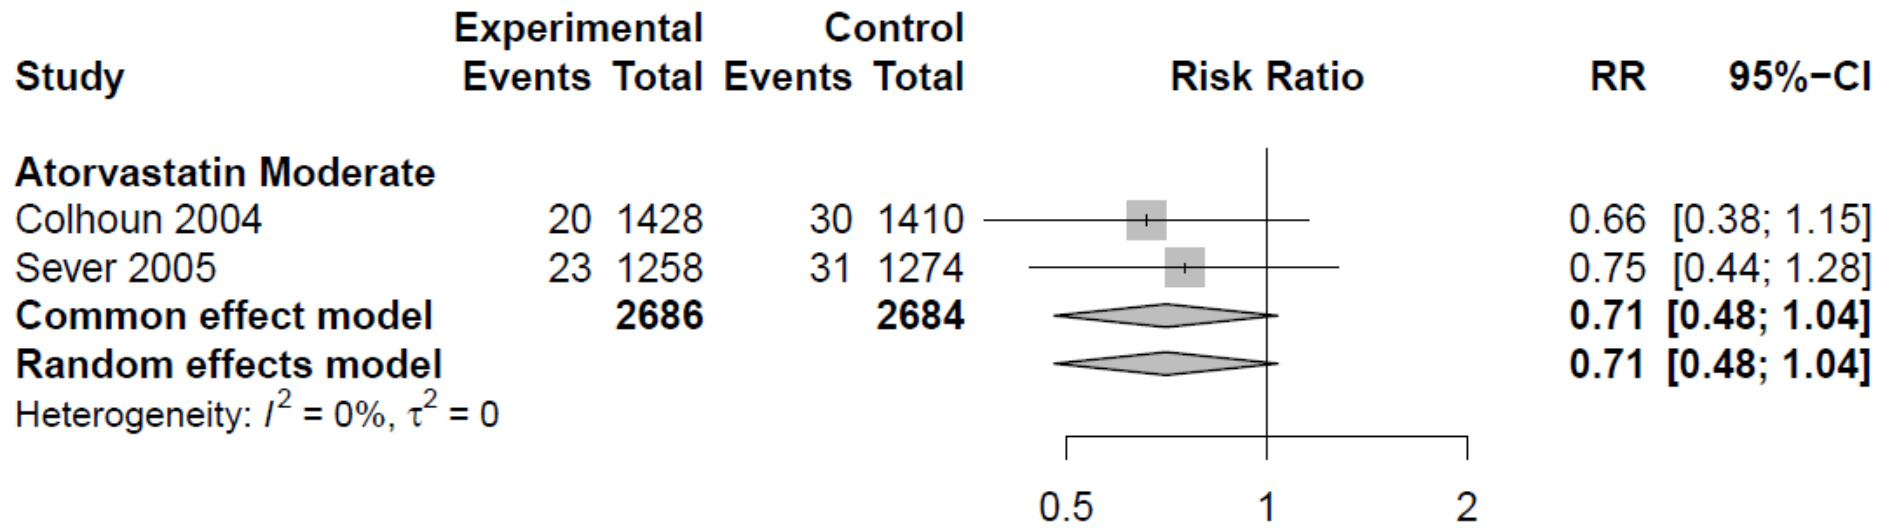

### Cardiovascular-related death

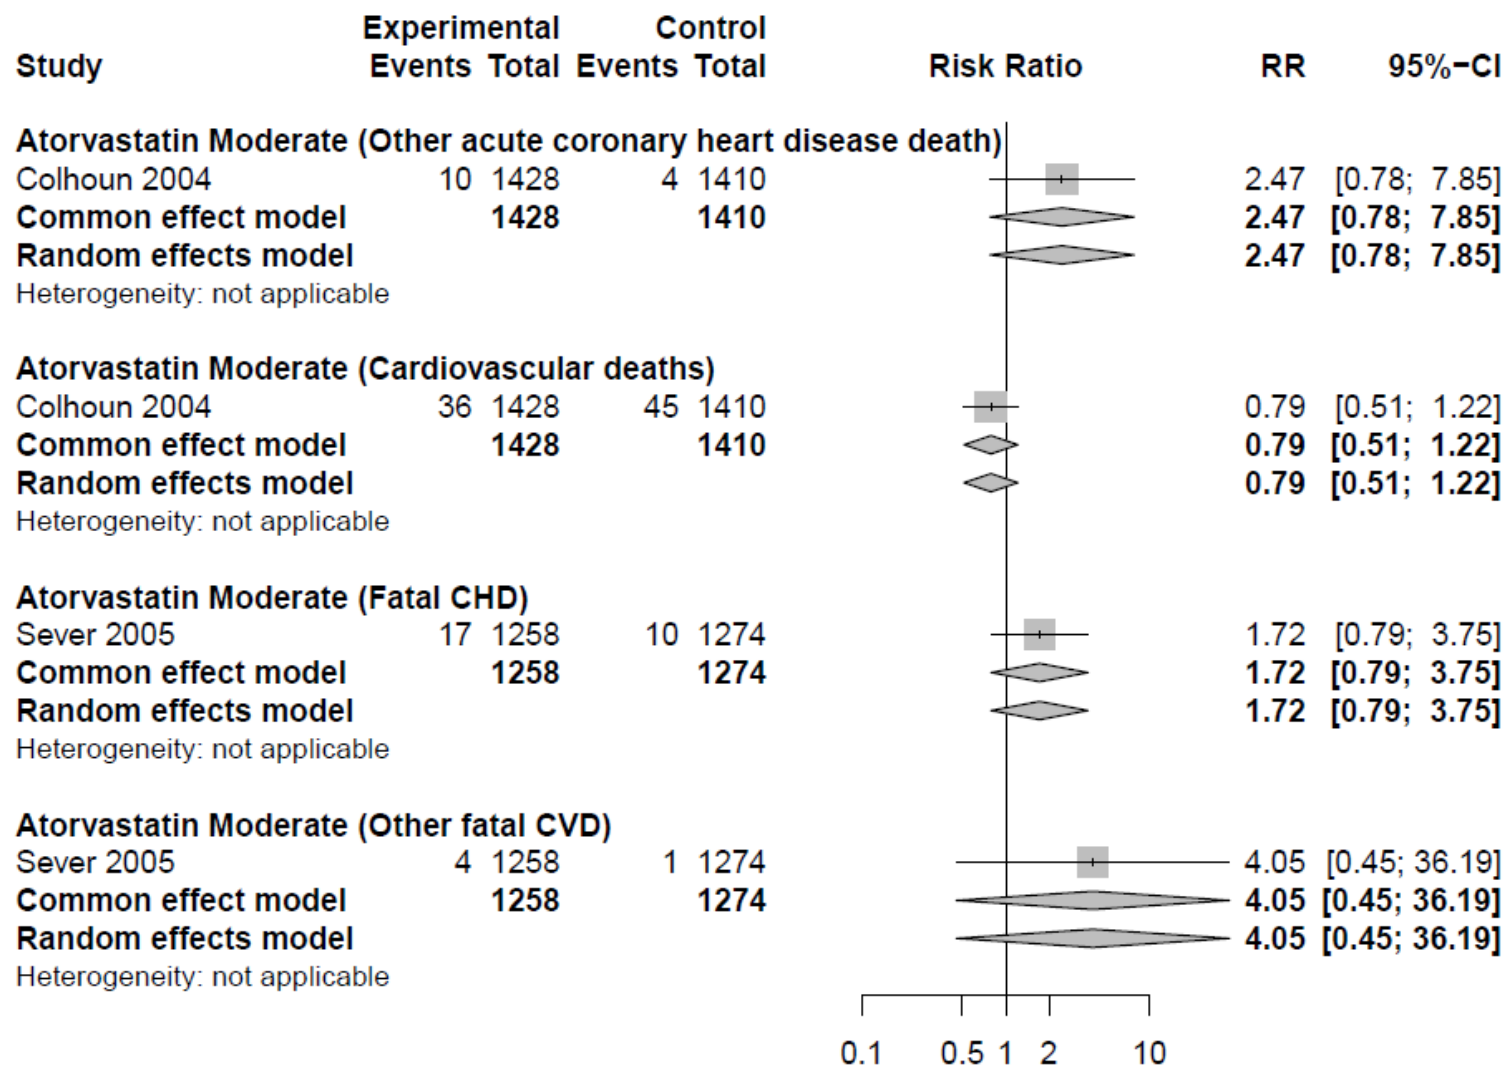

## Appendix 10: Treatment Ranking using SUCRA

### Main intensity model (non-HDL-C):

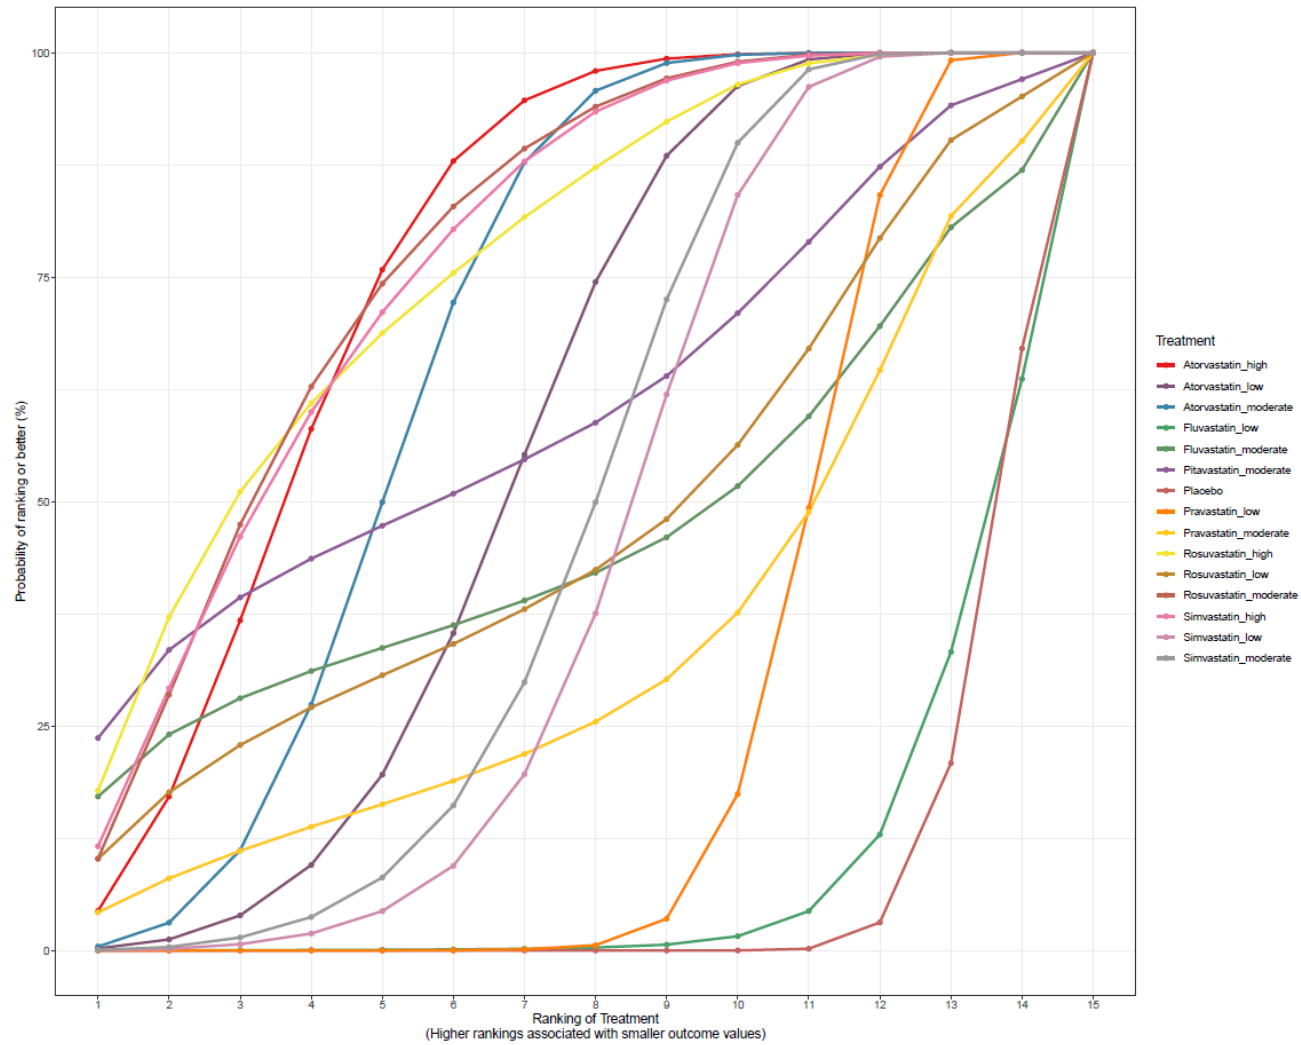

| Statin Agent and Intensity | SUCRA score* |
|----------------------------|--------------|
| Rosuvastatin moderate      | 0.77496696   |
| Rosuvastatin high          | 0.76798482   |
| Simvastatin high           | 0.7667625    |
| Atorvastatin high          | 0.76289821   |
| Atorvastatin moderate      | 0.67539286   |
| Pitavastatin moderate      | 0.60872321   |
| Atorvastatin low           | 0.55788661   |
| Simvastatin moderate       | 0.47678304   |
| Rosuvastatin low           | 0.47610179   |
| Fluvastatin moderate       | 0.44762411   |
| Simvastatin low            | 0.43856875   |
| Pravastatin moderate       | 0.34252589   |
| Pravastatin low            | 0.25295982   |
| Fluvastatin low            | 0.08495804   |
| Placebo                    | 0.06586339   |

\*Larger SUCRAs (green) denote the more effective statin agents and intensities.



**Patient Risk Adjusted Model (non-HDL-C):**

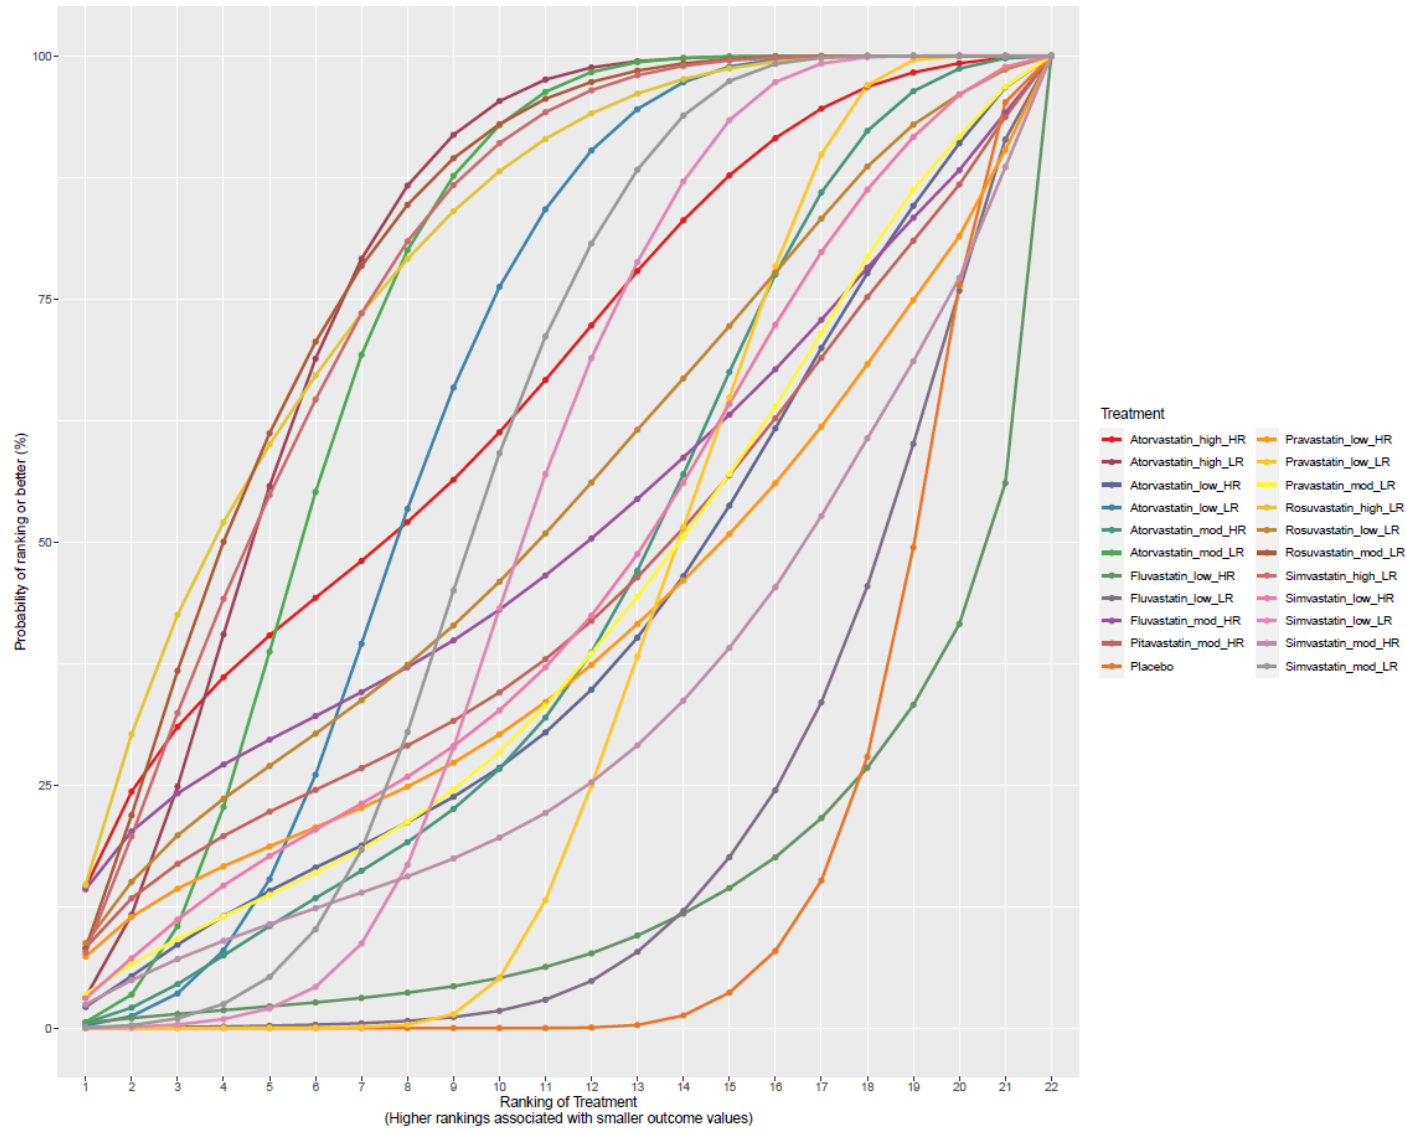

| Statin Agent and Intensity | SUCRA score* |
|----------------------------|--------------|
| Rosuvastatin mod LR        | 0.803122     |
| Rosuvastatin high LR       | 0.7935393    |
| Atorvastatin high LR       | 0.7892732    |
| Simvastatin high LR        | 0.7831512    |
| Atorvastatin mod LR        | 0.74255      |
| Atorvastatin low LR        | 0.6465827    |
| Atorvastatin high HR       | 0.6400351    |
| Simvastatin mod LR         | 0.5725964    |
| Rosuvastatin low LR        | 0.5389274    |
| Simvastatin low LR         | 0.5183702    |
| Fluvastatin mod HR         | 0.5161702    |
| Simvastatin low HR         | 0.4550923    |
| Pitavastatin mod HR        | 0.4390083    |
| Atorvastatin mod HR        | 0.4355357    |
| Pravastatin mod LR         | 0.4157256    |
| Pravastatin low HR         | 0.3981042    |
| Atorvastatin low HR        | 0.3963363    |
| Pravastatin low LR         | 0.3646827    |
| Simvastatin mod HR         | 0.3133452    |
| Fluvastatin low LR         | 0.1828077    |
| Placebo                    | 0.1323952    |
| Fluvastatin low HR         | 0.1226488    |

**Main intensity model (LDL-C):**

| <b>Statin Agent and Intensity</b> | <b>SUCRA score*</b> |
|-----------------------------------|---------------------|
| Simvastatin_high                  | 0.931794            |
| Rosuvastatin_high                 | 0.8928002           |
| Rosuvastatin_moderate             | 0.7886903           |
| Atorvastatin_high                 | 0.7421468           |
| Simvastatin_low                   | 0.6394138           |
| Atorvastatin_moderate             | 0.5972458           |
| Rosuvastatin_low                  | 0.5796707           |
| Pitavastatin_moderate             | 0.5468163           |
| Lovastatin_low                    | 0.451416            |
| Atorvastatin_low                  | 0.4354168           |
| Simvastatin_moderate              | 0.4109872           |
| Fluvastatin_moderate              | 0.368182            |
| Pravastatin_moderate              | 0.2859857           |
| Pravastatin_low                   | 0.2496543           |
| Placebo                           | 0.0548915           |
| Fluvastatin_low                   | 0.0248885           |

## Appendix 11: CINeMA Assessment

**Using the CINeMA framework, we evaluated the certainty of evidence for each network estimate according to the following criteria:**

- **Within study bias:** We categorized the overall risk of bias of each study as low risk of bias when none of the four assessed risk of bias item was rated high risk, as moderate risk of bias when one or two items were rated high risk, and as high risk when three or four were rated high risk. We then used the contribution matrix to calculate the percentage of contribution from each study, and finally assessed the study limitation for each network estimate based on the weighted average risk of bias of the contributing studies (Appendix 5).
- **Reporting bias:** We spotted major concerns visually with the comparison adjusted funnel plot to see if any statistically significance was present in pairwise comparisons (Appendix 11).
- **Indirectness:** Transitivity assumption was assessed through mean TC and HDL-C baseline scores for those reported and mean/SD age by comparing baseline consistency across intervention groups (See after CINeMA table).
- **Imprecision:** We considered a clinically meaningful threshold for SMD to be 0.20 and graded the degree of concerns according to the possible changes in clinical inference according to the following criteria:

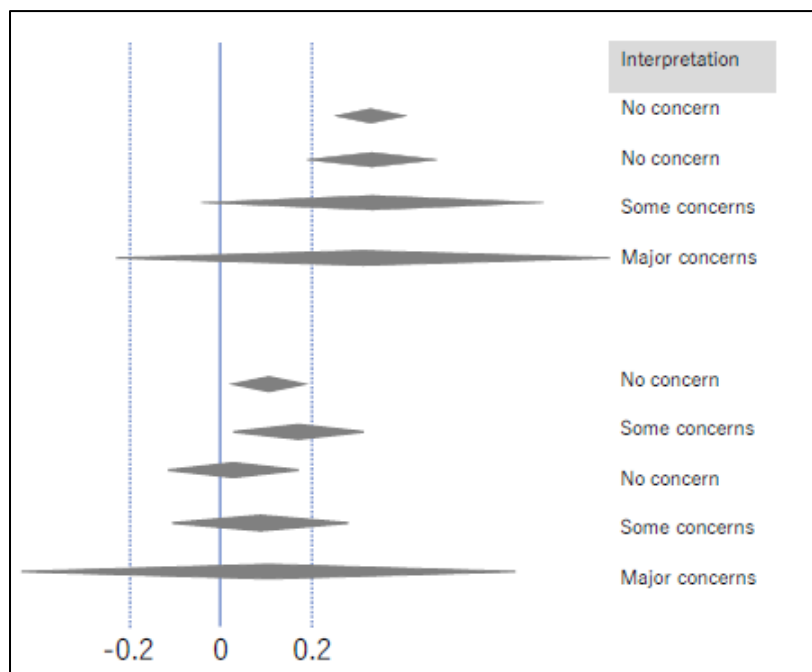

- Heterogeneity:** We evaluated the degree of concerns through comparing the clinical inference based on the 95% credible intervals (CrIs) whilst applying the same clinical inference framework as for imprecision. To support this heterogeneity assessment the Analysis of heterogeneity (ANOHE) function ('mtc.anohe') in the GeMTC package in R was used to assess  $I^2$  simultaneously whilst comparing pairwise contributions and network contributions. The function attempts to draw a distinction between inconsistency and heterogeneity but it should only be considered experimental (van Valkenhoef et al. 2014). Nevertheless, it can still be a useful guide for assessing heterogeneity in the network.

- **Incoherence (Inconsistency):** For inconsistency, we looked at the results of node-splitting (Appendix 7) and we saw major concerns when  $p < 0.10$  but no concern otherwise.

CINeMA Results Table

| Comparison                                      | No. of studies | Within-study bias | Reporting bias | Indirectness | Imprecision    | Heterogeneity | Incoherence    | Confidence rating |
|-------------------------------------------------|----------------|-------------------|----------------|--------------|----------------|---------------|----------------|-------------------|
| Mixed evidence                                  |                |                   |                |              |                |               |                |                   |
| Atorvastatin_high vs. Atorvastatin_low          | 4              | Major concerns    | Undetected     | No concerns  | No concerns    | Some concerns | No concerns    | Low               |
| Atorvastatin_high vs. Atorvastatin_moderate     | 6              | Major concerns    | Undetected     | No concerns  | No concerns    | No concerns   | No concerns    | Moderate          |
| Atorvastatin_high vs. Placebo                   | 4              | Major concerns    | Undetected     | No concerns  | No concerns    | No concerns   | No concerns    | Moderate          |
| Atorvastatin_high vs. Rosuvastatin_high         | 1              | Some concerns     | Undetected     | No concerns  | No concerns    | No concerns   | No concerns    | Moderate          |
| Atorvastatin_high vs. Simvastatin_moderate      | 1              | Major concerns    | Suspected      | No concerns  | No concerns    | No concerns   | No concerns    | Low               |
| Atorvastatin_low vs. Atorvastatin_moderate      | 5              | Major concerns    | Undetected     | No concerns  | No concerns    | No concerns   | No concerns    | Moderate          |
| Atorvastatin_low vs. Pravastatin_low            | 1              | Some concerns     | Undetected     | No concerns  | No concerns    | No concerns   | No concerns    | Moderate          |
| Atorvastatin_low vs. Rosuvastatin_high          | 1              | Some concerns     | Undetected     | No concerns  | No concerns    | No concerns   | No concerns    | Moderate          |
| Atorvastatin_low vs. Simvastatin_low            | 2              | Major concerns    | Undetected     | No concerns  | No concerns    | No concerns   | No concerns    | Moderate          |
| Atorvastatin_low vs. Simvastatin_moderate       | 2              | Some concerns     | Undetected     | No concerns  | No concerns    | No concerns   | No concerns    | Moderate          |
| Atorvastatin_moderate vs. Pitavastatin_moderate | 1              | No concerns       | Undetected     | No concerns  | No concerns    | No concerns   | No concerns    | High              |
| Atorvastatin_moderate vs. Placebo               | 5              | No concerns       | Undetected     | No concerns  | No concerns    | No concerns   | No concerns    | High              |
| Atorvastatin_moderate vs. Pravastatin_low       | 3              | Some concerns     | Undetected     | No concerns  | No concerns    | No concerns   | Major concerns | Low               |
| Atorvastatin_moderate vs. Rosuvastatin_high     | 1              | Some concerns     | Some concerns  | No concerns  | No concerns    | No concerns   | No concerns    | Moderate          |
| Atorvastatin_moderate vs. Rosuvastatin_moderate | 1              | Some concerns     | Undetected     | No concerns  | No concerns    | No concerns   | No concerns    | Moderate          |
| Atorvastatin_moderate vs. Simvastatin_low       | 2              | Major concerns    | Undetected     | No concerns  | No concerns    | No concerns   | No concerns    | Moderate          |
| Atorvastatin_moderate vs. Simvastatin_moderate  | 3              | Some concerns     | Undetected     | No concerns  | No concerns    | No concerns   | No concerns    | Moderate          |
| Fluvastatin_low vs. Placebo                     | 2              | Major concerns    | Undetected     | No concerns  | No concerns    | No concerns   | No concerns    | Moderate          |
| Fluvastatin_moderate vs. Placebo                | 1              | No concerns       | Undetected     | No concerns  | Major concerns | No concerns   | No concerns    | Moderate          |

|                                             |   |                |            |               |               |                |                |          |
|---------------------------------------------|---|----------------|------------|---------------|---------------|----------------|----------------|----------|
| Placebo vs. Pravastatin_low                 | 6 | Major concerns | Undetected | Some concerns | No concerns   | Some concerns  | No concerns    | Low      |
| Placebo vs. Pravastatin_moderate            | 1 | No concerns    | Undetected | No concerns   | Some concerns | No concerns    | No concerns    | Moderate |
| Placebo vs. Rosuvastatin_high               | 1 | No concerns    | Undetected | No concerns   | No concerns   | No concerns    | No concerns    | High     |
| Placebo vs. Rosuvastatin_low                | 1 | No concerns    | Undetected | No concerns   | Some concerns | No concerns    | No concerns    | Moderate |
| Placebo vs. Rosuvastatin_moderate           | 1 | No concerns    | Undetected | No concerns   | No concerns   | No concerns    | No concerns    | High     |
| Placebo vs. Simvastatin_high                | 1 | No concerns    | Undetected | No concerns   | No concerns   | No concerns    | No concerns    | High     |
| Placebo vs. Simvastatin_low                 | 2 | No concerns    | Undetected | No concerns   | No concerns   | Some concerns  | Some concerns  | Moderate |
| Placebo vs. Simvastatin_moderate            | 6 | Some concerns  | Undetected | Some concerns | No concerns   | No concerns    | No concerns    | Moderate |
| Pravastatin_low vs. Pravastatin_moderate    | 1 | No concerns    | Undetected | No concerns   | No concerns   | No concerns    | No concerns    | High     |
| Pravastatin_low vs. Rosuvastatin_high       | 1 | Some concerns  | Undetected | No concerns   | No concerns   | No concerns    | No concerns    | Moderate |
| Pravastatin_low vs. Rosuvastatin_moderate   | 1 | Some concerns  | Undetected | No concerns   | No concerns   | No concerns    | No concerns    | Moderate |
| Pravastatin_low vs. Simvastatin_low         | 1 | Major concerns | Undetected | No concerns   | No concerns   | No concerns    | No concerns    | Moderate |
| Pravastatin_low vs. Simvastatin_moderate    | 2 | Some concerns  | Undetected | No concerns   | No concerns   | Major concerns | Major concerns | Very Low |
| Rosuvastatin_high vs. Rosuvastatin_low      | 1 | No concerns    | Suspected  | No concerns   | No concerns   | No concerns    | No concerns    | Moderate |
| Rosuvastatin_high vs. Rosuvastatin_moderate | 1 | No concerns    | Suspected  | No concerns   | No concerns   | No concerns    | No concerns    | Moderate |
| Rosuvastatin_high vs. Simvastatin_moderate  | 1 | Some concerns  | Suspected  | No concerns   | No concerns   | No concerns    | No concerns    | Low      |
| Rosuvastatin_low vs. Rosuvastatin_moderate  | 1 | No concerns    | Undetected | No concerns   | No concerns   | No concerns    | No concerns    | High     |
| Simvastatin_high vs. Simvastatin_low        | 1 | No concerns    | Undetected | No concerns   | No concerns   | No concerns    | No concerns    | High     |
| Simvastatin_high vs. Simvastatin_moderate   | 2 | No concerns    | Undetected | No concerns   | No concerns   | No concerns    | No concerns    | High     |
| Simvastatin_low vs. Simvastatin_moderate    | 1 | No concerns    | Undetected | No concerns   | No concerns   | No concerns    | No concerns    | High     |
| Indirect evidence                           |   |                |            |               |               |                |                |          |
| Atorvastatin_high vs. Fluvastatin_low       | 0 | Major concerns | Undetected | No concerns   | No concerns   | No concerns    | No concerns    | Moderate |



|                                                |   |                |            |             |               |             |             |          |
|------------------------------------------------|---|----------------|------------|-------------|---------------|-------------|-------------|----------|
| Atorvastatin_high vs. Fluvastatin_moderate     | 0 | No concerns    | Undetected | No concerns | No concerns   | No concerns | No concerns | High     |
| Atorvastatin_high vs. Pitavastatin_moderate    | 0 | No concerns    | Undetected | No concerns | No concerns   | No concerns | No concerns | High     |
| Atorvastatin_high vs. Pravastatin_low          | 0 | Some concerns  | Undetected | No concerns | No concerns   | No concerns | No concerns | Moderate |
| Atorvastatin_high vs. Pravastatin_moderate     | 0 | No concerns    | Undetected | No concerns | Some concerns | No concerns | No concerns | Moderate |
| Atorvastatin_high vs. Rosuvastatin_low         | 0 | No concerns    | Undetected | No concerns | No concerns   | No concerns | No concerns | High     |
| Atorvastatin_high vs. Rosuvastatin_moderate    | 0 | Some concerns  | Undetected | No concerns | No concerns   | No concerns | No concerns | Moderate |
| Atorvastatin_high vs. Simvastatin_high         | 0 | No concerns    | Undetected | No concerns | No concerns   | No concerns | No concerns | High     |
| Atorvastatin_high vs. Simvastatin_low          | 0 | Major concerns | Undetected | No concerns | No concerns   | No concerns | No concerns | Moderate |
| Atorvastatin_low vs. Fluvastatin_low           | 0 | Major concerns | Undetected | No concerns | No concerns   | No concerns | No concerns | Moderate |
| Atorvastatin_low vs. Fluvastatin_moderate      | 0 | No concerns    | Undetected | No concerns | No concerns   | No concerns | No concerns | High     |
| Atorvastatin_low vs. Pitavastatin_moderate     | 0 | No concerns    | Undetected | No concerns | No concerns   | No concerns | No concerns | High     |
| Atorvastatin_low vs. Placebo                   | 0 | Major concerns | Undetected | No concerns | No concerns   | No concerns | No concerns | Moderate |
| Atorvastatin_low vs. Pravastatin_moderate      | 0 | No concerns    | Undetected | No concerns | No concerns   | No concerns | No concerns | High     |
| Atorvastatin_low vs. Rosuvastatin_low          | 0 | No concerns    | Undetected | No concerns | No concerns   | No concerns | No concerns | High     |
| Atorvastatin_low vs. Rosuvastatin_moderate     | 0 | Some concerns  | Undetected | No concerns | No concerns   | No concerns | No concerns | Moderate |
| Atorvastatin_low vs. Simvastatin_high          | 0 | No concerns    | Undetected | No concerns | No concerns   | No concerns | No concerns | High     |
| Atorvastatin_moderate vs. Fluvastatin_low      | 0 | No concerns    | Undetected | No concerns | No concerns   | No concerns | No concerns | High     |
| Atorvastatin_moderate vs. Fluvastatin_moderate | 0 | No concerns    | Undetected | No concerns | No concerns   | No concerns | No concerns | High     |
| Atorvastatin_moderate vs. Pravastatin_moderate | 0 | No concerns    | Undetected | No concerns | No concerns   | No concerns | No concerns | High     |
| Atorvastatin_moderate vs. Rosuvastatin_low     | 0 | No concerns    | Undetected | No concerns | No concerns   | No concerns | No concerns | High     |

|                                                |   |                |            |             |                |             |             |          |
|------------------------------------------------|---|----------------|------------|-------------|----------------|-------------|-------------|----------|
| Atorvastatin_moderate vs. Simvastatin_high     | 0 | No concerns    | Undetected | No concerns | No concerns    | No concerns | No concerns | High     |
| Fluvastatin_low vs. Fluvastatin_moderate       | 0 | No concerns    | Undetected | No concerns | Major concerns | No concerns | No concerns | Moderate |
| Fluvastatin_low vs. Pitavastatin_moderate      | 0 | No concerns    | Undetected | No concerns | No concerns    | No concerns | No concerns | High     |
| Fluvastatin_low vs. Pravastatin_low            | 0 | Major concerns | Undetected | No concerns | No concerns    | No concerns | No concerns | Moderate |
| Fluvastatin_low vs. Pravastatin_moderate       | 0 | No concerns    | Undetected | No concerns | Major concerns | No concerns | No concerns | Moderate |
| Fluvastatin_low vs. Rosuvastatin_high          | 0 | No concerns    | Undetected | No concerns | No concerns    | No concerns | No concerns | High     |
| Fluvastatin_low vs. Rosuvastatin_low           | 0 | No concerns    | Undetected | No concerns | Some concerns  | No concerns | No concerns | Moderate |
| Fluvastatin_low vs. Rosuvastatin_moderate      | 0 | No concerns    | Undetected | No concerns | No concerns    | No concerns | No concerns | High     |
| Fluvastatin_low vs. Simvastatin_high           | 0 | No concerns    | Undetected | No concerns | No concerns    | No concerns | No concerns | High     |
| Fluvastatin_low vs. Simvastatin_low            | 0 | No concerns    | Undetected | No concerns | No concerns    | No concerns | No concerns | High     |
| Fluvastatin_low vs. Simvastatin_moderate       | 0 | No concerns    | Undetected | No concerns | No concerns    | No concerns | No concerns | High     |
| Fluvastatin_moderate vs. Pitavastatin_moderate | 0 | No concerns    | Undetected | No concerns | No concerns    | No concerns | No concerns | High     |
| Fluvastatin_moderate vs. Pravastatin_low       | 0 | No concerns    | Undetected | No concerns | No concerns    | No concerns | No concerns | High     |
| Fluvastatin_moderate vs. Pravastatin_moderate  | 0 | No concerns    | Undetected | No concerns | No concerns    | No concerns | No concerns | High     |
| Fluvastatin_moderate vs. Rosuvastatin_high     | 0 | No concerns    | Undetected | No concerns | No concerns    | No concerns | No concerns | High     |
| Fluvastatin_moderate vs. Rosuvastatin_low      | 0 | No concerns    | Undetected | No concerns | No concerns    | No concerns | No concerns | High     |
| Fluvastatin_moderate vs. Rosuvastatin_moderate | 0 | No concerns    | Undetected | No concerns | No concerns    | No concerns | No concerns | High     |
| Fluvastatin_moderate vs. Simvastatin_high      | 0 | No concerns    | Undetected | No concerns | No concerns    | No concerns | No concerns | High     |
| Fluvastatin_moderate vs. Simvastatin_low       | 0 | No concerns    | Undetected | No concerns | No concerns    | No concerns | No concerns | High     |
| Fluvastatin_moderate vs. Simvastatin_moderate  | 0 | No concerns    | Undetected | No concerns | No concerns    | No concerns | No concerns | High     |

|                                                 |   |               |            |             |                |             |             |          |
|-------------------------------------------------|---|---------------|------------|-------------|----------------|-------------|-------------|----------|
| Pitavastatin_moderate vs. Placebo               | 0 | No concerns   | Undetected | No concerns | Major concerns | No concerns | No concerns | Moderate |
| Pitavastatin_moderate vs. Pravastatin_low       | 0 | No concerns   | Undetected | No concerns | No concerns    | No concerns | No concerns | High     |
| Pitavastatin_moderate vs. Pravastatin_moderate  | 0 | No concerns   | Undetected | No concerns | No concerns    | No concerns | No concerns | High     |
| Pitavastatin_moderate vs. Rosuvastatin_high     | 0 | No concerns   | Undetected | No concerns | Some concerns  | No concerns | No concerns | Moderate |
| Pitavastatin_moderate vs. Rosuvastatin_low      | 0 | No concerns   | Undetected | No concerns | No concerns    | No concerns | No concerns | High     |
| Pitavastatin_moderate vs. Rosuvastatin_moderate | 0 | No concerns   | Undetected | No concerns | Some concerns  | No concerns | No concerns | Moderate |
| Pitavastatin_moderate vs. Simvastatin_high      | 0 | No concerns   | Undetected | No concerns | Some concerns  | No concerns | No concerns | Moderate |
| Pitavastatin_moderate vs. Simvastatin_low       | 0 | No concerns   | Undetected | No concerns | No concerns    | No concerns | No concerns | High     |
| Pitavastatin_moderate vs. Simvastatin_moderate  | 0 | No concerns   | Undetected | No concerns | No concerns    | No concerns | No concerns | High     |
| Pravastatin_low vs. Rosuvastatin_low            | 0 | No concerns   | Undetected | No concerns | No concerns    | No concerns | No concerns | High     |
| Pravastatin_low vs. Simvastatin_high            | 0 | No concerns   | Undetected | No concerns | No concerns    | No concerns | No concerns | High     |
| Pravastatin_moderate vs. Rosuvastatin_high      | 0 | No concerns   | Undetected | No concerns | No concerns    | No concerns | No concerns | High     |
| Pravastatin_moderate vs. Rosuvastatin_low       | 0 | No concerns   | Undetected | No concerns | No concerns    | No concerns | No concerns | High     |
| Pravastatin_moderate vs. Rosuvastatin_moderate  | 0 | No concerns   | Undetected | No concerns | No concerns    | No concerns | No concerns | High     |
| Pravastatin_moderate vs. Simvastatin_high       | 0 | No concerns   | Undetected | No concerns | No concerns    | No concerns | No concerns | High     |
| Pravastatin_moderate vs. Simvastatin_low        | 0 | No concerns   | Undetected | No concerns | No concerns    | No concerns | No concerns | High     |
| Pravastatin_moderate vs. Simvastatin_moderate   | 0 | No concerns   | Undetected | No concerns | No concerns    | No concerns | No concerns | High     |
| Rosuvastatin_high vs. Simvastatin_high          | 0 | No concerns   | Undetected | No concerns | No concerns    | No concerns | No concerns | High     |
| Rosuvastatin_high vs. Simvastatin_low           | 0 | Some concerns | Undetected | No concerns | No concerns    | No concerns | No concerns | Moderate |

|                                                |   |               |            |             |             |             |             |          |
|------------------------------------------------|---|---------------|------------|-------------|-------------|-------------|-------------|----------|
| Rosuvastatin_low vs. Simvastatin_high          | 0 | No concerns   | Undetected | No concerns | No concerns | No concerns | No concerns | High     |
| Rosuvastatin_low vs. Simvastatin_low           | 0 | No concerns   | Undetected | No concerns | No concerns | No concerns | No concerns | High     |
| Rosuvastatin_low vs. Simvastatin_moderate      | 0 | No concerns   | Undetected | No concerns | No concerns | No concerns | No concerns | High     |
| Rosuvastatin_moderate vs. Simvastatin_high     | 0 | No concerns   | Undetected | No concerns | No concerns | No concerns | No concerns | High     |
| Rosuvastatin_moderate vs. Simvastatin_low      | 0 | No concerns   | Undetected | No concerns | No concerns | No concerns | No concerns | High     |
| Rosuvastatin_moderate vs. Simvastatin_moderate | 0 | Some concerns | Undetected | No concerns | No concerns | No concerns | No concerns | Moderate |

### Transitivity (Indirectness) Assessment:

Pooled baseline characteristics for each statin intervention and placebo

| Statin intervention   | Baseline variable (Mean ± SD) |                            |                    |
|-----------------------|-------------------------------|----------------------------|--------------------|
|                       | Age (yrs.)                    | Total Cholesterol (mmol/L) | HDL-C (mmol/L)     |
| Atorvastatin_high     | 59.20 ± 9.46                  | 5.95 ± 4.66                | 1.21 ± 1.75        |
| Atorvastatin_low      | 61.37 ± 9.72                  | 7.91 ± 3.36                | 0.62 ± 0.25        |
| Atorvastatin_moderate | 60.16 ± 8.77                  | 5.84 ± 14.06               | 1.25 ± 5.09        |
| Fluvastatin_low       | 62.90 ± 19.00                 | 5.52 ± 2.86                | 1.24 ± 1.20        |
| Fluvastatin_moderate  | 68.00 ± 10.00                 | 6.32 ± 6.35                | 1.14 ± 2.01        |
| Pitavastatin_moderate | 58.70 ± 8.60                  | 6.08 ± 7.33                | 1.42 ± 3.68        |
| Pravastatin_low       | 54.28 ± 3.03                  | 6.24 ± 4.79                | 1.32 ± 1.92        |
| Pravastatin_moderate  | 60.00 ± NR                    | 5.95 ± 5.93                | 1.42 ± 2.08        |
| Rosuvastatin_high     | 56.20 ± 7.16                  | 6.11 ± 11.15               | 1.22 ± 3.35        |
| Rosuvastatin_low      | 57.00 ± 7.50                  | NR                         | NR                 |
| Rosuvastatin_moderate | 59.75 ± 4.55                  | 6.06 ± 2.97                | 1.46 ± 1.60        |
| Simvastatin_high      | 58.70 ± 5.90                  | 6.22 ± 3.10                | 1.02 ± 0.39        |
| Simvastatin_low       | 60.44 ± 5.45                  | 6.00 ± 3.14                | 1.18 ± 1.59        |
| Simvastatin_moderate  | 55.92 ± 5.89                  | 6.30 ± 5.82                | 1.17 ± 2.11        |
| Placebo               | 56.98 ± 8.33                  | 8.96 ± 7.87                | 1.79 ± 3.89        |
| <b>Pooled average</b> | <b>59.31 ± 8.10</b>           | <b>6.39 ± 5.96</b>         | <b>1.25 ± 2.21</b> |

NR: not reported.

Plot of mean age by each intervention group and study

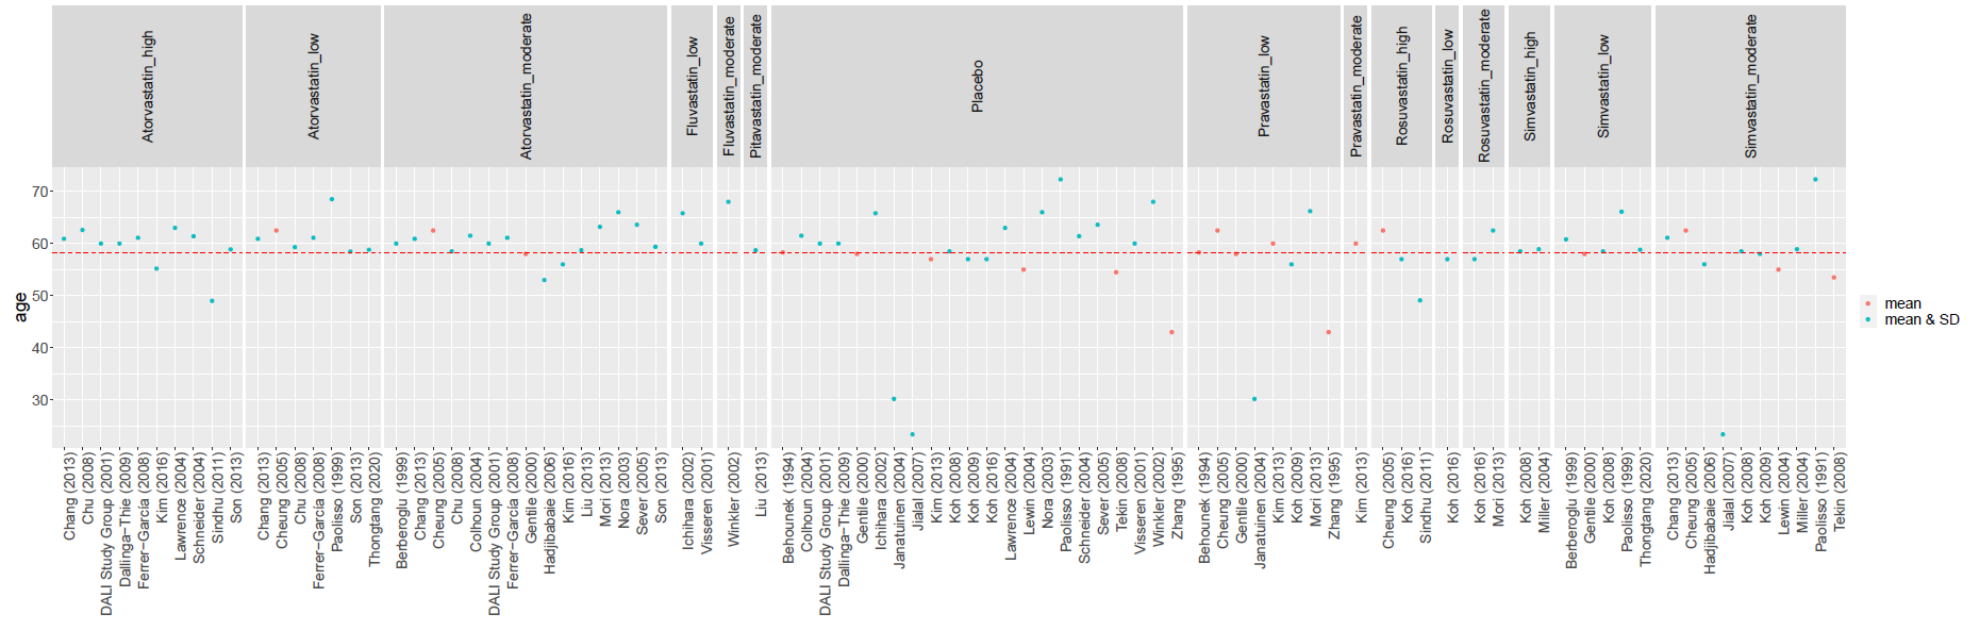

## Appendix 12: Comparison-Adjusted Funnel Plots

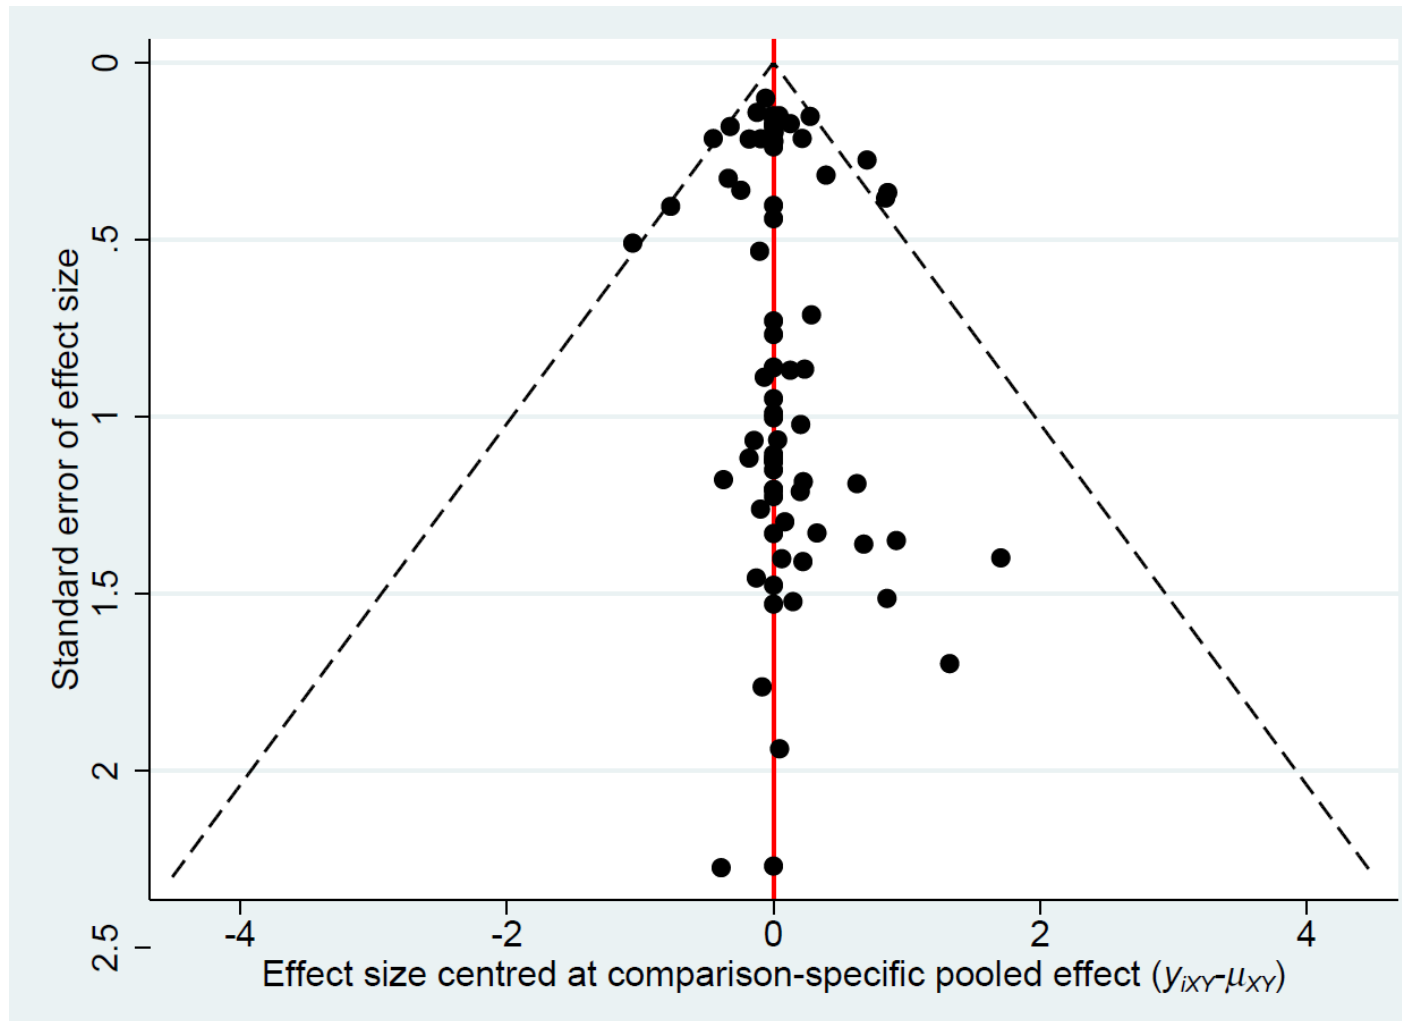

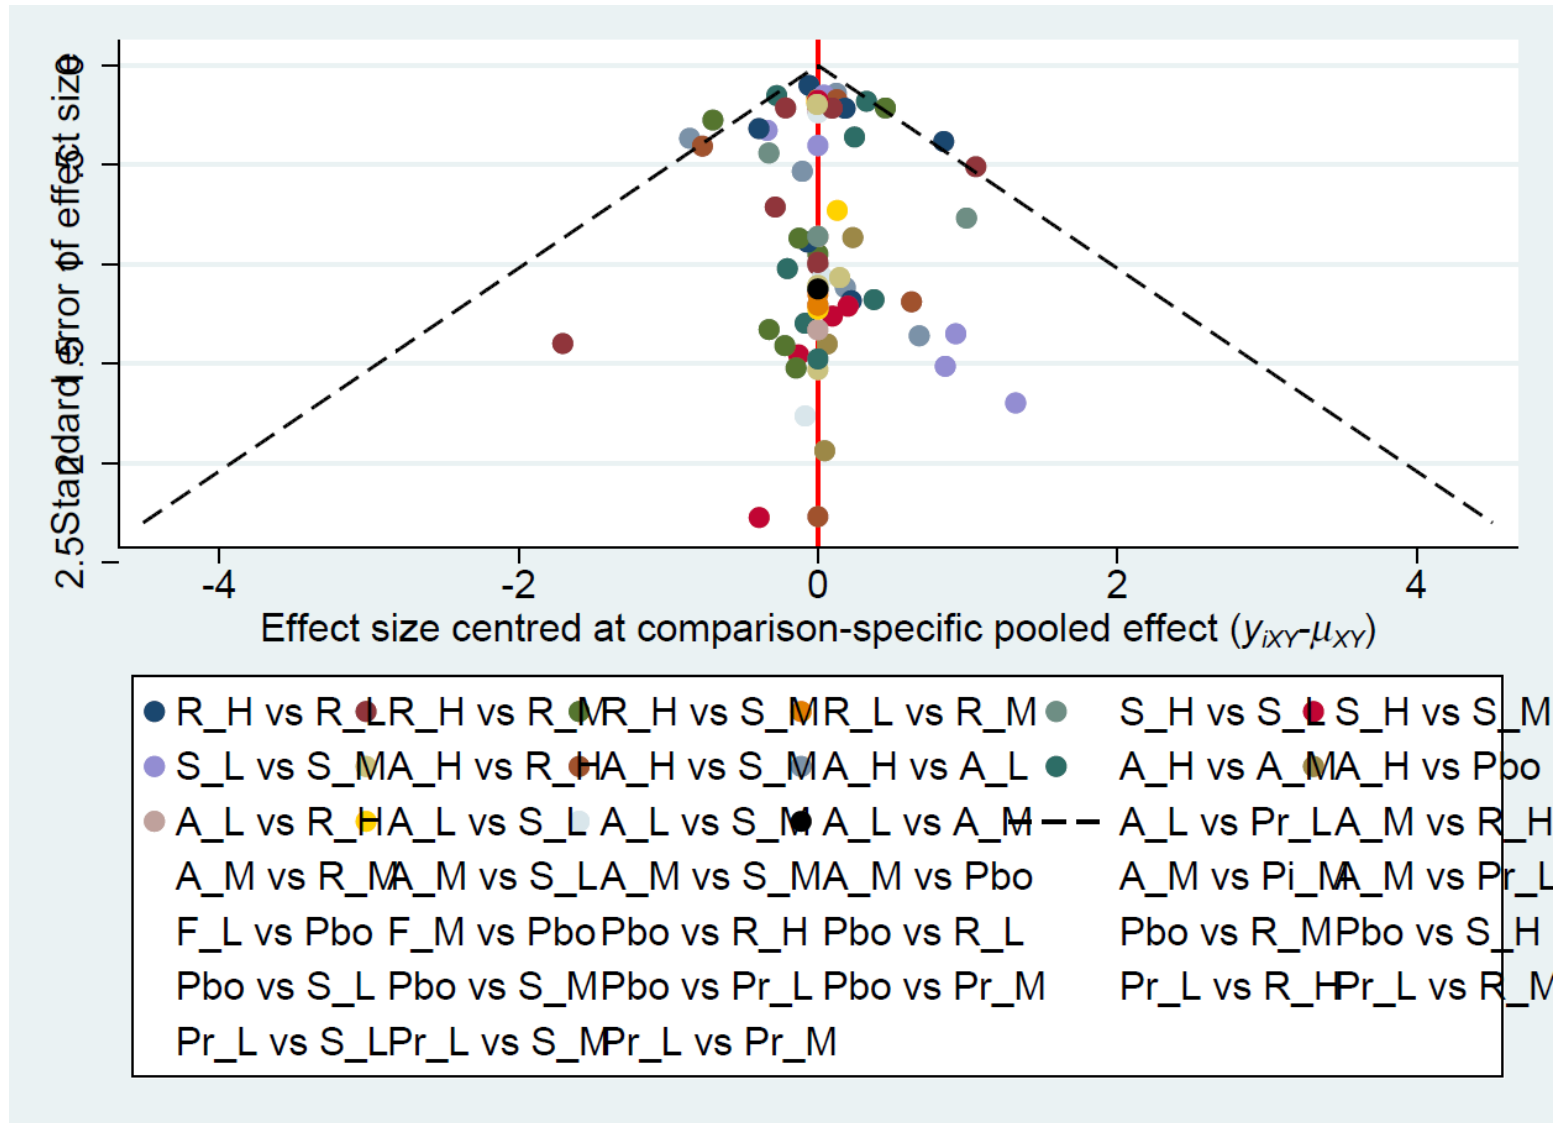



## Appendix 13: Sensitivity Analysis of Network Model by Dose

### Full Dose model:

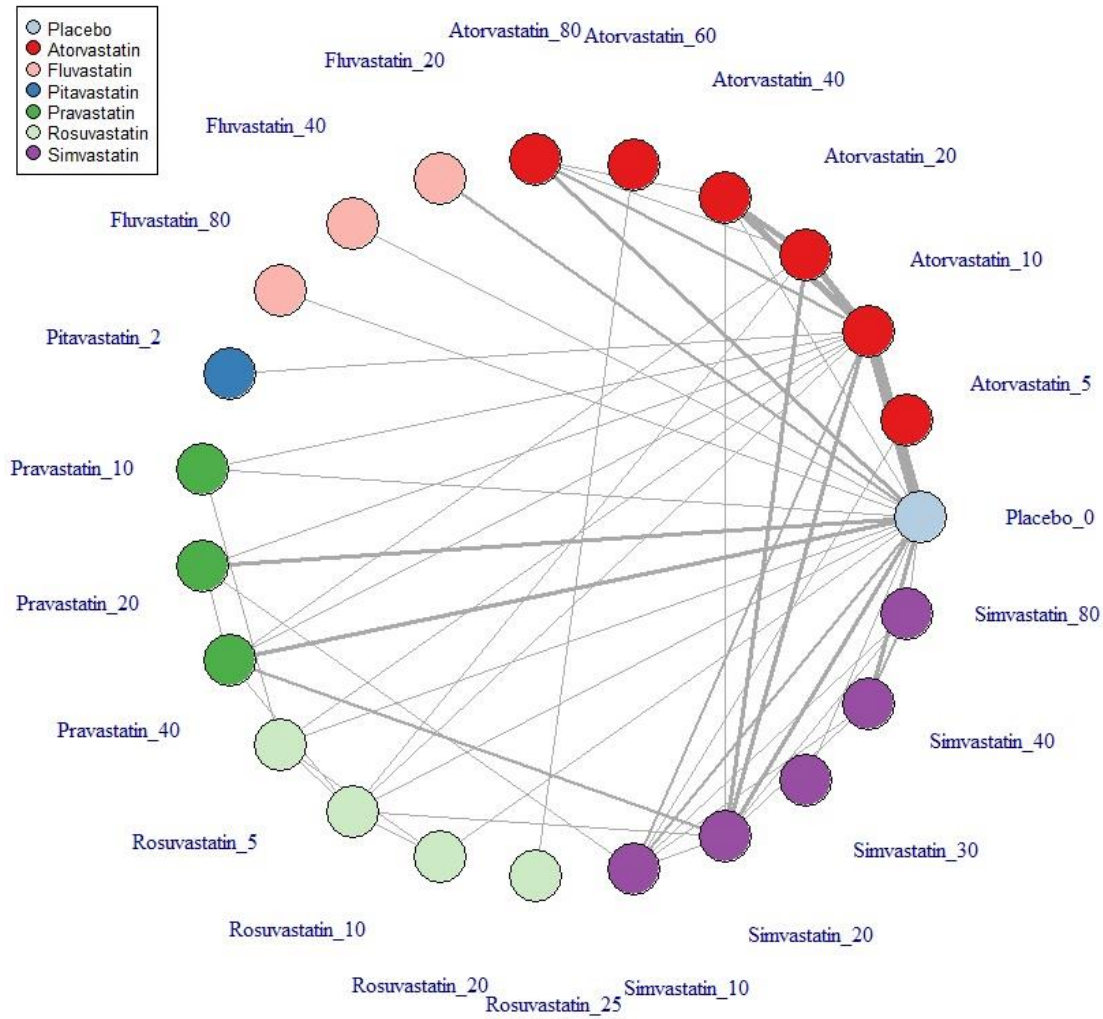

Mean Difference (95% CrI)

Compared with Placebo

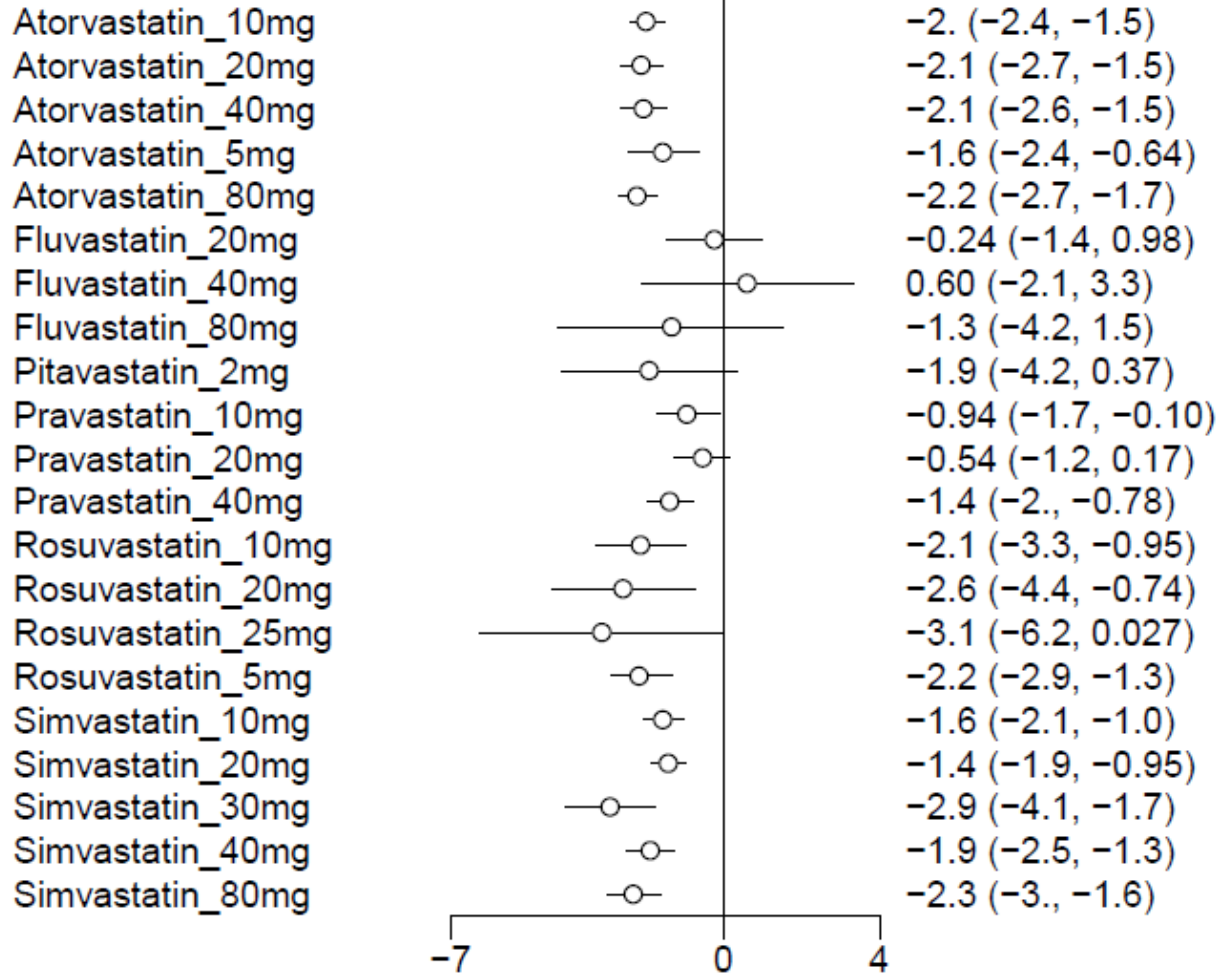

SUCRA ranking scores for dose model

| Statin dose       | SUCRA      |
|-------------------|------------|
| Simvastatin_30mg  | 0.88393369 |
| Rosuvastatin_25mg | 0.79916333 |
| Simvastatin_80mg  | 0.7657019  |
| Rosuvastatin_20mg | 0.75476976 |
| Atorvastatin_80mg | 0.73942417 |
| Rosuvastatin_5mg  | 0.69471548 |
| Atorvastatin_20mg | 0.6831675  |
| Rosuvastatin_10mg | 0.66163071 |
| Atorvastatin_40mg | 0.64883845 |
| Atorvastatin_10mg | 0.6054731  |
| Pitavastatin_2mg  | 0.56963798 |
| Simvastatin_40mg  | 0.56301345 |
| Fluvastatin_80mg  | 0.44912214 |
| Atorvastatin_5mg  | 0.42551083 |
| Simvastatin_10mg  | 0.41047107 |
| Simvastatin_20mg  | 0.35371524 |
| Pravastatin_40mg  | 0.34568488 |
| Pravastatin_10mg  | 0.22700405 |
| Pravastatin_20mg  | 0.15143417 |
| Fluvastatin_20mg  | 0.11654107 |
| Fluvastatin_40mg  | 0.08704774 |
| Placebo           | 0.06399929 |

**Node-split inconsistency analysis:**

| <b>Comparison</b>                       | <b>P-value</b> | <b>CrI</b>           |
|-----------------------------------------|----------------|----------------------|
| Atorvastatin_10mg vs. Atorvastatin_20mg | 0.287          |                      |
| - direct                                |                | -0.035 (-0.53, 0.31) |
| - indirect                              |                | 0.72 (-0.64, 2.3)    |
| - network                               |                | -0.12 (-0.63, 0.31)  |
| Atorvastatin_10mg vs. Atorvastatin_40mg | 0.6705         |                      |
| - direct                                |                | 0.015 (-0.57, 0.47)  |
| - indirect                              |                | -0.58 (-3.3, 2.4)    |
| - network                               |                | -0.057 (-0.60, 0.39) |
| Atorvastatin_10mg vs. Atorvastatin_80mg | 0.69125        |                      |
| - direct                                |                | -0.13 (-0.66, 0.38)  |
| - indirect                              |                | -0.48 (-2.1, 1.1)    |
| - network                               |                | -0.23 (-0.71, 0.19)  |
| Atorvastatin_10mg vs. Placebo           | 0.5775         |                      |
| - direct                                |                | 2. (1.5, 2.4)        |
| - indirect                              |                | 1.8 (1.2, 2.4)       |
| - network                               |                | 2. (1.5, 2.4)        |
| Atorvastatin_10mg vs. Pravastatin_10mg  | 0.91775        |                      |
| -> direct                               |                | 1.0 (0.27, 1.7)      |
| -> indirect                             |                | 0.84 (-2.4, 5.2)     |
| -> network                              |                | 1.1 (0.37, 1.7)      |
| Atorvastatin_10mg vs. Pravastatin_20mg  | 0.25725        |                      |
| - direct                                |                | 1.9 (0.83, 3.1)      |
| - indirect                              |                | 0.76 (-1.1, 2.5)     |
| - network                               |                | 1.4 (0.68, 2.2)      |
| Atorvastatin_10mg vs. Pravastatin_40mg  | 0.66775        |                      |
| - direct                                |                | 0.17 (-1.8, 2.3)     |
| - indirect                              |                | 0.66 (-0.083, 1.3)   |
| - network                               |                | 0.64 (-0.065, 1.3)   |
| Atorvastatin_10mg vs. Rosuvastatin_10mg | 0.96975        |                      |

|                                         |         |                      |
|-----------------------------------------|---------|----------------------|
| - direct                                |         | -0.27 (-2.1, 1.5)    |
| - indirect                              |         | -0.25 (-2.2, 2.0)    |
| - network                               |         | -0.16 (-1.3, 1.0)    |
| Atorvastatin_10mg vs. Rosuvastatin_5mg  | 0.498   |                      |
| - direct                                |         | -0.23 (-0.94, 0.48)  |
| - indirect                              |         | 0.52 (-1.6, 2.8)     |
| - network                               |         | -0.17 (-0.85, 0.54)  |
| Atorvastatin_10mg vs. Simvastatin_10mg  | 0.23975 |                      |
| - direct                                |         | 0.85 (-0.095, 1.8)   |
| - indirect                              |         | 0.13 (-0.75, 0.94)   |
| - network                               |         | 0.43 (-0.17, 0.98)   |
| Atorvastatin_10mg vs. Simvastatin_20mg  | 0.722   |                      |
| - direct                                |         | 0.27 (-1.3, 1.8)     |
| - indirect                              |         | 0.60 (-0.00082, 1.2) |
| - network                               |         | 0.57 (0.013, 1.1)    |
| Atorvastatin_20mg vs. Atorvastatin_40mg | 0.38675 |                      |
| - direct                                |         | 0.17 (-0.35, 0.66)   |
| - indirect                              |         | -0.80 (-2.7, 1.2)    |
| - network                               |         | 0.066 (-0.49, 0.55)  |
| Atorvastatin_20mg vs. Atorvastatin_80mg | 0.3115  |                      |
| - direct                                |         | 0.10 (-0.56, 0.78)   |
| - indirect                              |         | -0.40 (-1.2, 0.37)   |
| - network                               |         | -0.10 (-0.65, 0.44)  |
| Atorvastatin_20mg vs. Pravastatin_40mg  | 0.9385  |                      |
| - direct                                |         | 0.64 (-1.4, 2.6)     |
| - indirect                              |         | 0.72 (-0.060, 1.6)   |
| - network                               |         | 0.76 (-0.0053, 1.5)  |
| Atorvastatin_20mg vs. Rosuvastatin_10mg | 0.99125 |                      |
| - direct                                |         | -0.068 (-2.1, 1.8)   |
| - indirect                              |         | -0.056 (-2.0, 2.0)   |
| - network                               |         | -0.025 (-1.2, 1.2)   |
| Atorvastatin_20mg vs. Simvastatin_20mg  | 0.31125 |                      |

|                                         |         |                      |
|-----------------------------------------|---------|----------------------|
| - direct                                |         | 0.15 (-1.0, 1.3)     |
| - indirect                              |         | 0.88 (0.12, 1.7)     |
| - network                               |         | 0.69 (0.057, 1.3)    |
| Atorvastatin_40mg vs. Atorvastatin_80mg | 0.98675 |                      |
| - direct                                |         | -0.12 (-0.71, 0.46)  |
| - indirect                              |         | -0.10 (-0.81, 0.63)  |
| - network                               |         | -0.18 (-0.71, 0.43)  |
| Atorvastatin_40mg vs. Placebo           | 0.83375 |                      |
| - direct                                |         | 2.4 (-0.35, 5.2)     |
| - indirect                              |         | 2.1 (1.5, 2.7)       |
| - network                               |         | 2.1 (1.5, 2.6)       |
| Atorvastatin_40mg vs. Simvastatin_20mg  | 0.5855  |                      |
| - direct                                |         | 1.4 (-1.5, 3.6)      |
| - indirect                              |         | 0.58 (-0.093, 1.3)   |
| - network                               |         | 0.63 (-0.037, 1.3)   |
| Atorvastatin_80mg vs. Placebo           | 0.22375 |                      |
| - direct                                |         | 2.4 (1.8, 3.0)       |
| - indirect                              |         | 1.8 (1.0, 2.6)       |
| - network                               |         | 2.2 (1.7, 2.7)       |
| Placebo vs. Pravastatin_10mg            | 0.831   |                      |
| - direct                                |         | -0.64 (-3.5, 2.4)    |
| - indirect                              |         | -0.94 (-1.7, -0.085) |
| - network                               |         | -0.95 (-1.7, -0.11)  |
| Placebo vs. Pravastatin_40mg            | 0.886   |                      |
| - direct                                |         | -1.5 (-2.1, -0.75)   |
| - indirect                              |         | -1.3 (-3.2, 0.39)    |
| - network                               |         | -1.4 (-1.9, -0.79)   |
| Placebo vs. Rosuvastatin_10mg           | 0.7035  |                      |
| - direct                                |         | -1.6 (-3.9, 0.74)    |
| - indirect                              |         | -2.2 (-3.5, -0.77)   |
| - network                               |         | -2.1 (-3.3, -0.94)   |
| Placebo vs. Rosuvastatin_5mg            | 0.4535  |                      |

|                                        |         |                      |
|----------------------------------------|---------|----------------------|
| - direct                               |         | -1.2 (-3.7, 1.3)     |
| - indirect                             |         | -2.2 (-3.3, -1.4)    |
| - network                              |         | -2.2 (-2.9, -1.3)    |
| Placebo vs. Simvastatin_10mg           | 0.535   |                      |
| - direct                               |         | -1.5 (-2.1, -0.85)   |
| - indirect                             |         | -2.0 (-3.7, -0.24)   |
| - network                              |         | -1.6 (-2.1, -1.0)    |
| Placebo vs. Simvastatin_20mg           | 0.5375  |                      |
| - direct                               |         | -1.5 (-2.8, -0.88)   |
| - indirect                             |         | -1.8 (-2.9, -0.72)   |
| - network                              |         | -1.4 (-1.9, -0.97)   |
| Placebo vs. Simvastatin_80mg           | 0.777   |                      |
| - direct                               |         | -2.4 (-3.2, -1.5)    |
| - indirect                             |         | -1.9 (-4.7, 0.66)    |
| - network                              |         | -2.3 (-3.1, -1.7)    |
| Pravastatin_10mg vs. Rosuvastatin_5mg  | 0.71925 |                      |
| - direct                               |         | -1.2 (-2.7, -0.50)   |
| - indirect                             |         | -0.52 (-4.2, 3.5)    |
| - network                              |         | -1.2 (-1.9, -0.52)   |
| Pravastatin_20mg vs. Pravastatin_40mg  | 0.539   |                      |
| - direct                               |         | -0.21 (-2.5, 2.1)    |
| - indirect                             |         | -0.98 (-1.9, -0.070) |
| - network                              |         | -0.82 (-1.7, 0.041)  |
| Pravastatin_20mg vs. Simvastatin_10mg  | 0.9555  |                      |
| - direct                               |         | -0.70 (-1.7, 0.29)   |
| - indirect                             |         | -0.74 (-2.7, 0.94)   |
| - network                              |         | -1.0 (-1.8, -0.22)   |
| Pravastatin_40mg vs. Rosuvastatin_10mg | 0.96175 |                      |
| - direct                               |         | -0.70 (-2.6, 1.1)    |
| - indirect                             |         | -0.63 (-2.8, 1.3)    |
| - network                              |         | -0.77 (-2.1, 0.51)   |
| Pravastatin_40mg vs. Simvastatin_20mg  | 0.628   |                      |

|                                        |         |                      |
|----------------------------------------|---------|----------------------|
| - direct                               |         | -0.063 (-0.77, 0.64) |
| - indirect                             |         | -0.45 (-1.8, 1.0)    |
| - network                              |         | -0.059 (-0.67, 0.52) |
| Rosuvastatin_10mg vs. Rosuvastatin_5mg | 0.7785  |                      |
| - direct                               |         | 0.30 (-2.1, 2.6)     |
| - indirect                             |         | -0.087 (-1.6, 1.5)   |
| - network                              |         | -0.022 (-1.3, 1.3)   |
| Rosuvastatin_10mg vs. Simvastatin_20mg | 0.94975 |                      |
| - direct                               |         | 0.56 (-1.5, 2.4)     |
| - indirect                             |         | 0.69 (-1.3, 2.9)     |
| - network                              |         | 0.70 (-0.49, 1.9)    |
| Simvastatin_10mg vs. Simvastatin_20mg  | 0.26325 |                      |
| - direct                               |         | 0.38 (-0.41, 1.2)    |
| - indirect                             |         | -0.30 (-1.3, 0.60)   |
| - network                              |         | 0.14 (-0.45, 0.71)   |
| Simvastatin_10mg vs. Simvastatin_40mg  | 0.84725 |                      |
| - direct                               |         | -0.24 (-0.98, 0.49)  |
| - indirect                             |         | -0.40 (-2.3, 1.1)    |
| - network                              |         | -0.31 (-0.96, 0.33)  |
| Simvastatin_10mg vs. Simvastatin_80mg  | 0.82075 |                      |
| - direct                               |         | -0.65 (-1.4, 0.13)   |
| - indirect                             |         | -0.97 (-3.8, 1.7)    |
| - network                              |         | -0.74 (-1.5, -0.071) |
| Simvastatin_20mg vs. Simvastatin_40mg  | 0.48075 |                      |
| - direct                               |         | -0.62 (-1.4, 0.18)   |
| - indirect                             |         | -0.0078 (-1.5, 1.5)  |
| - network                              |         | -0.45 (-1.1, 0.19)   |
| Simvastatin_20mg vs. Simvastatin_80mg  | 0.75175 |                      |
| - direct                               |         | -1.0 (-1.9, -0.23)   |
| - indirect                             |         | -0.55 (-3.3, 2.4)    |
| - network                              |         | -0.89 (-1.6, -0.22)  |



Overall statin intensity model ignoring agent:

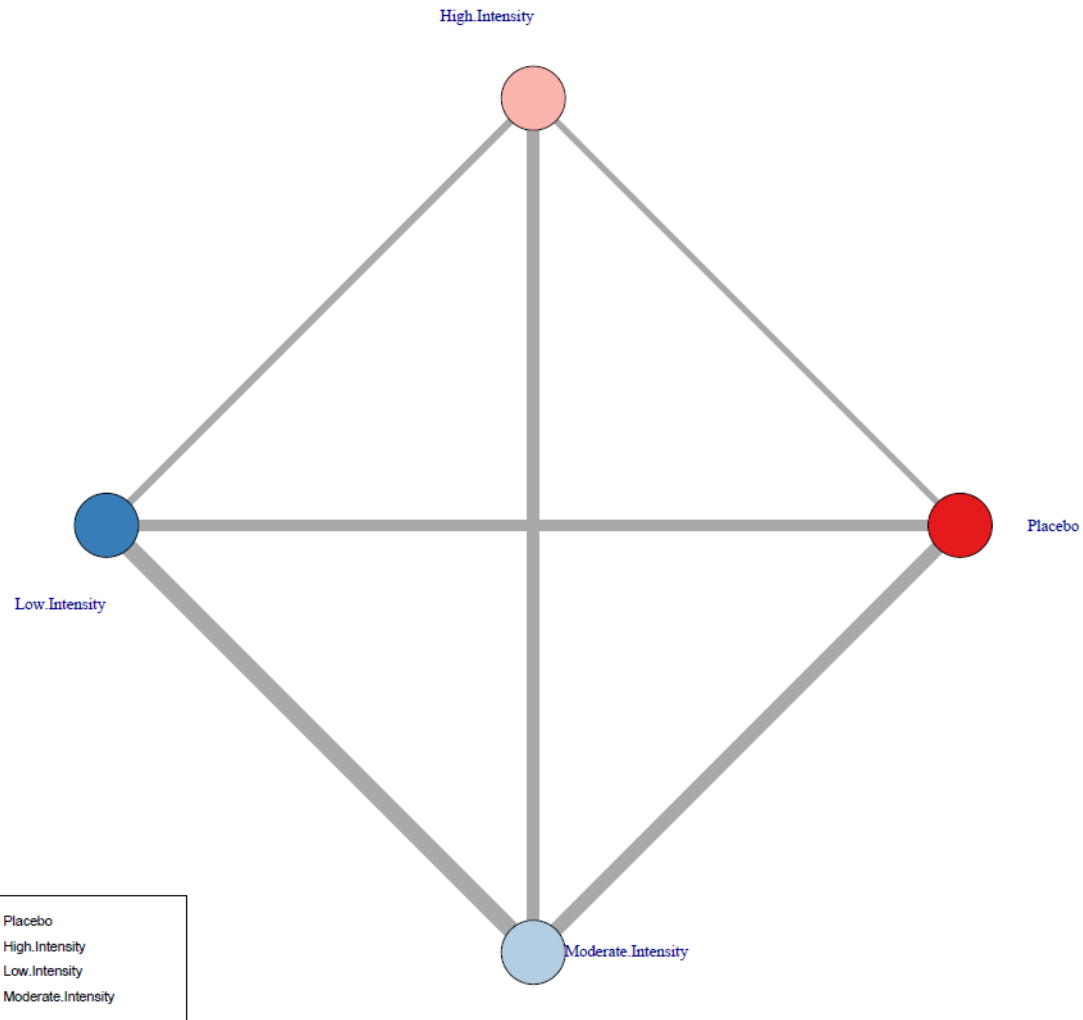

Forest plot of intensity model ignoring agent:

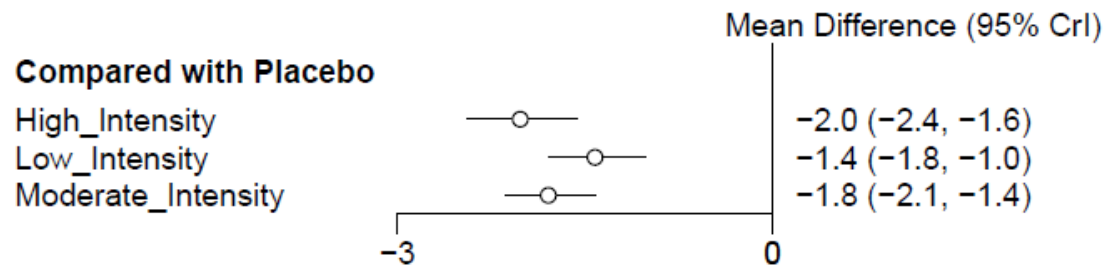

**Node-split inconsistency analysis:**

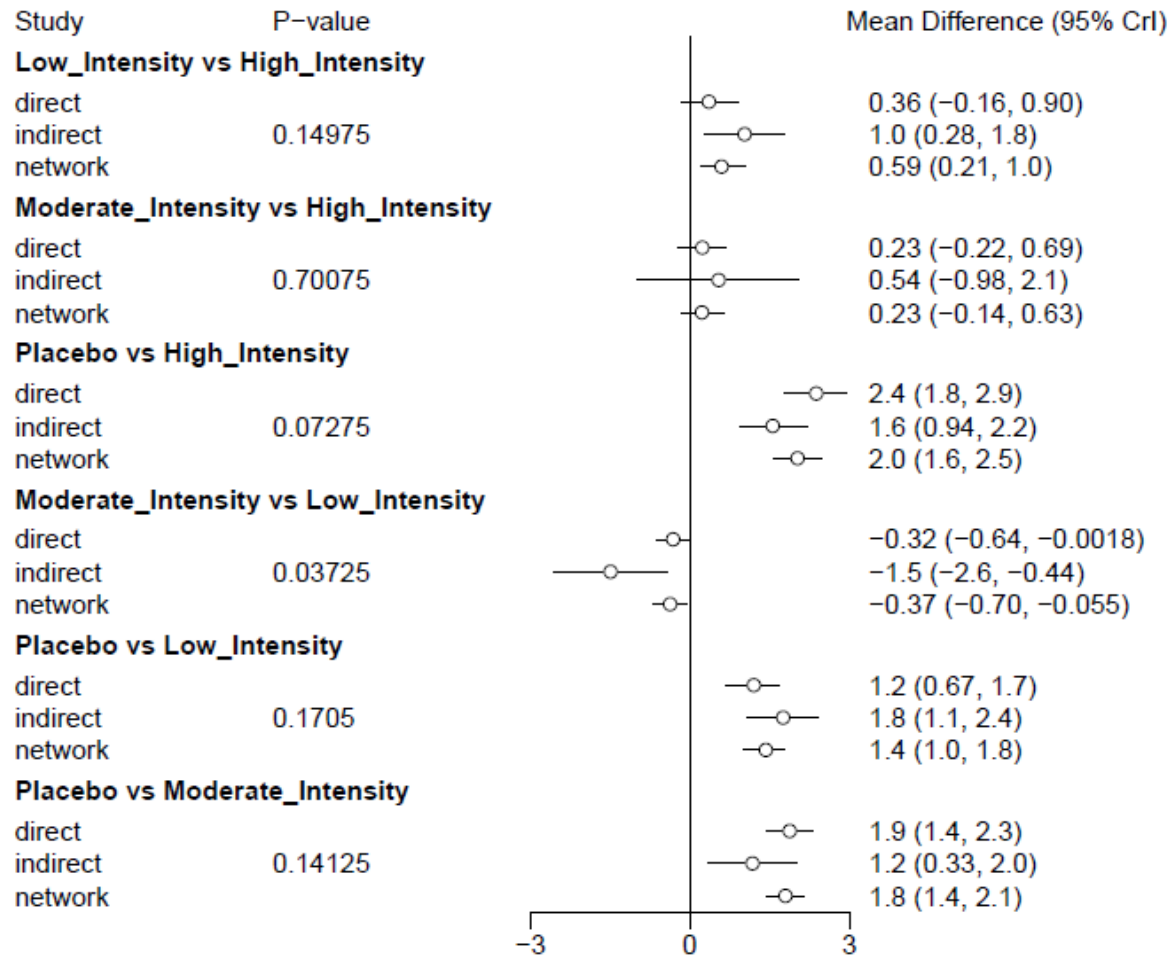

# Appendix 14: Further Results for the Subgroup Analysis

League table 'heat plot' of head-to-head comparisons for patient risk subgroup analysis

|                      | Treatment                  |                            |                            |                            |                            |                        |                            |                            |                        |                            |                        |                        |                        |                        |                        |                        |                        |                          |                        |                          | Placebo                  | Fluvastatin low HR       |
|----------------------|----------------------------|----------------------------|----------------------------|----------------------------|----------------------------|------------------------|----------------------------|----------------------------|------------------------|----------------------------|------------------------|------------------------|------------------------|------------------------|------------------------|------------------------|------------------------|--------------------------|------------------------|--------------------------|--------------------------|--------------------------|
|                      | Rosuvastatin_mod_LR        | Rosuvastatin_high_LR       | Atorvastatin_high_LR       | Simvastatin_high_LR        | Atorvastatin_mod_LR        | Atorvastatin_high_HR   | Atorvastatin_low_LR        | Simvastatin_mod_LR         | Rosuvastatin_low_LR    | Simvastatin_low_LR         | Fluvastatin_mod_LR     | Simvastatin_low_HR     | Pravastatin_mod_HR     | Atorvastatin_high_HR   | Pravastatin_mod_LR     | Pravastatin_low_HR     | Atorvastatin_low_HR    | Pravastatin_low_LR       | Simvastatin_high_HR    | Fluvastatin_low_LR       | Placebo                  | Fluvastatin_low_HR       |
| Rosuvastatin_mod_LR  | -                          | -0.04<br>(-1.25, 1.15)     | 0.08<br>(-0.77, 0.90)      | 0.06<br>(-1.02, 1.11)      | 0.18<br>(-0.59, 0.91)      | 0.35<br>(-1.97, 2.64)  | 0.37<br>(-0.45, 1.23)      | 0.55<br>(-0.33, 1.39)      | 0.73<br>(-1.40, 2.85)  | 0.68<br>(-0.21, 1.56)      | 0.89<br>(-2.15, 3.97)  | 1.08<br>(-1.36, 3.49)  | 1.17<br>(-1.85, 4.20)  | 1.10<br>(-0.90, 3.10)  | 1.21<br>(-0.93, 3.34)  | 1.37<br>(-1.62, 4.38)  | 1.29<br>(-1.27, 3.85)  | 1.16**<br>(0.41, 1.91)   | 1.72<br>(-1.15, 4.60)  | **2.13**<br>(0.57, 3.67) | **2.31**<br>(1.50, 3.08) | **2.91**<br>(0.30, 5.77) |
| Rosuvastatin_high_LR | 0.04<br>(-1.15, 1.25)      | -                          | 0.12<br>(-1.01, 1.25)      | 0.09<br>(-1.21, 1.41)      | 0.22<br>(-0.88, 1.32)      | 0.39<br>(-2.05, 2.52)  | 0.41<br>(-0.72, 1.56)      | 0.59<br>(-0.56, 1.74)      | 0.79<br>(-1.37, 2.94)  | 0.72<br>(-0.45, 1.90)      | 0.93<br>(-2.23, 4.11)  | 1.12<br>(-1.43, 3.66)  | 1.21<br>(-1.93, 4.34)  | 1.15<br>(-1.00, 3.28)  | 1.25<br>(-1.04, 3.53)  | 1.41<br>(-1.67, 4.51)  | 1.33<br>(-1.32, 4.01)  | **1.20**<br>(0.09, 2.32) | 1.75<br>(-1.23, 4.74)  | **2.17**<br>(0.44, 3.90) | **2.34**<br>(1.24, 3.45) | 2.95<br>(**2.01, 5.53)   |
| Atorvastatin_high_LR | -0.08<br>(-0.90, 0.77)     | -0.12<br>(-1.25, 1.01)     | -                          | -0.02<br>(-0.92, 0.88)     | 0.10<br>(-0.37, 0.56)      | 0.27<br>(-1.97, 2.50)  | 0.29<br>(-0.23, 0.85)      | 0.47<br>(-0.20, 1.13)      | 0.66<br>(-1.50, 2.81)  | 0.60<br>(-0.06, 1.27)      | 0.81<br>(-2.21, 3.85)  | 1.00<br>(-1.37, 3.36)  | 1.09<br>(-1.90, 4.08)  | 1.22<br>(-0.90, 2.94)  | 1.13<br>(-0.95, 3.22)  | 1.30<br>(-1.83, 4.24)  | 1.22<br>(-1.27, 3.72)  | **1.09**<br>(0.47, 1.72) | 1.64<br>(-1.20, 4.46)  | **2.05**<br>(0.62, 3.48) | **2.23**<br>(1.68, 2.76) | **2.83**<br>(0.02, 5.63) |
| Simvastatin_high_LR  | -0.06<br>(-1.11, 1.02)     | -0.09<br>(-1.41, 1.21)     | -0.08<br>(-0.88, 0.52)     | -                          | 0.13<br>(-0.73, 0.97)      | 0.30<br>(-2.01, 2.59)  | 0.32<br>(-0.57, 1.23)      | 0.50<br>(-0.29, 1.26)      | 0.68<br>(-1.57, 2.93)  | 0.62<br>(-0.17, 1.44)      | 0.83<br>(-2.23, 3.92)  | 1.02<br>(-1.42, 3.44)  | 1.12<br>(-1.94, 4.15)  | 1.05<br>(-0.95, 3.05)  | 1.15<br>(-1.00, 3.32)  | 1.32<br>(-1.65, 4.32)  | 1.24<br>(-1.31, 3.81)  | **1.11**<br>(0.26, 1.98) | 1.67<br>(-1.23, 4.53)  | **2.08**<br>(0.53, 3.61) | **2.25**<br>(1.47, 3.02) | 2.96<br>(**0.01, 5.70)   |
| Atorvastatin_mod_LR  | -0.18<br>(-0.91, 0.59)     | -0.22<br>(-1.32, 0.88)     | -0.10<br>(-0.56, 0.37)     | -0.13<br>(-0.97, 0.73)     | -                          | 0.17<br>(-2.05, 2.38)  | 0.19<br>(-0.29, 0.72)      | 0.37<br>(-0.22, 0.96)      | 0.56<br>(-1.57, 2.69)  | 0.50<br>(-0.09, 1.12)      | 0.71<br>(-2.29, 3.74)  | 0.90<br>(-1.45, 3.25)  | 0.99<br>(-1.99, 3.97)  | 0.92<br>(-0.97, 2.83)  | 1.03<br>(-1.02, 3.10)  | 1.19<br>(-1.72, 4.12)  | 1.11<br>(-1.36, 3.61)  | **0.98**<br>(0.48, 1.52) | 1.54<br>(-1.29, 4.35)  | **1.95**<br>(0.55, 3.36) | **2.12**<br>(1.66, 2.59) | 2.73<br>(**0.07, 5.52)   |
| Atorvastatin_high_HR | -0.38<br>(-2.64, 1.97)     | -0.39<br>(-2.82, 2.05)     | -0.30<br>(-2.50, 1.97)     | -0.30<br>(-2.50, 2.01)     | -                          | -0.17<br>(-2.38, 2.05) | 0.03<br>(-2.20, 2.28)      | 0.20<br>(-2.01, 2.42)      | 0.39<br>(-2.68, 3.43)  | 0.33<br>(-1.89, 2.58)      | 0.54<br>(-3.13, 4.22)  | 0.73<br>(-1.57, 3.06)  | 0.83<br>(-2.28, 3.88)  | 0.75<br>(-1.27, 2.79)  | 0.86<br>(-2.10, 3.64)  | 1.03<br>(-2.51, 4.61)  | 0.94<br>(-1.35, 3.29)  | 0.82<br>(-1.39, 3.04)    | 1.37<br>(-1.09, 3.64)  | 1.78<br>(-0.74, 4.33)    | 1.95<br>(**0.20, 4.13)   | 2.97<br>(**0.96, 6.04)   |
| Atorvastatin_low_LR  | -0.37<br>(-1.23, 0.48)     | -0.41<br>(-1.56, 0.72)     | -0.29<br>(-0.85, 0.23)     | -0.32<br>(-1.23, 0.57)     | -0.19<br>(-0.72, 0.29)     | -                      | -0.03<br>(-2.28, 2.20)     | 0.18<br>(-0.52, 0.84)      | 0.36<br>(-1.80, 2.53)  | 0.30<br>(-0.31, 0.91)      | 0.51<br>(-2.51, 3.66)  | 0.70<br>(-1.66, 3.07)  | 0.80<br>(-2.21, 3.79)  | 0.72<br>(-1.20, 2.66)  | 0.83<br>(-1.26, 2.93)  | 1.00<br>(-1.55, 3.95)  | 0.92<br>(-1.58, 3.43)  | **0.79**<br>(0.14, 1.43) | 1.35<br>(-1.51, 4.17)  | **1.76**<br>(0.30, 3.20) | **1.93**<br>(1.13, 2.90) | 2.54<br>(**0.28, 5.34)   |
| Simvastatin_mod_LR   | -0.55<br>(-1.39, 0.33)     | -0.59<br>(-1.74, 0.56)     | -0.47<br>(-1.13, 0.20)     | -0.50<br>(-1.26, 0.29)     | -0.37<br>(-0.96, 0.22)     | -0.20<br>(-2.42, 2.01) | -0.19<br>(-0.84, 0.52)     | -                          | 0.19<br>(-1.97, 2.35)  | 0.13<br>(-0.48, 0.77)      | 0.34<br>(-2.66, 3.37)  | 0.53<br>(-1.83, 2.88)  | 0.62<br>(-2.37, 3.60)  | 0.56<br>(-1.35, 2.46)  | 0.66<br>(-1.41, 2.74)  | 0.83<br>(-2.10, 3.76)  | 0.74<br>(-1.72, 3.24)  | **0.61**<br>(0.05, 1.21) | 1.17<br>(-1.66, 3.98)  | **1.88**<br>(0.17, 2.99) | **1.76**<br>(1.28, 2.23) | 2.36<br>(**0.44, 5.14)   |
| Rosuvastatin_low_LR  | -0.73<br>(-2.86, 1.40)     | -0.78<br>(-2.94, 1.37)     | -0.61<br>(-2.81, 1.50)     | -0.68<br>(-2.93, 1.57)     | -0.56<br>(-2.59, 1.57)     | -0.39<br>(-2.43, 2.68) | -0.36<br>(-2.53, 1.80)     | -0.19<br>(-2.35, 1.97)     | -                      | 0.06<br>(-2.23, 2.12)      | 0.16<br>(-3.51, 3.80)  | 0.34<br>(-2.79, 3.48)  | 0.43<br>(-3.16, 4.07)  | 0.37<br>(-2.43, 3.17)  | 0.47<br>(-2.44, 4.41)  | 0.64<br>(-2.94, 4.24)  | 0.55<br>(-2.66, 3.81)  | 0.43<br>(-1.71, 2.43)    | 0.98<br>(-2.50, 4.50)  | 1.40<br>(**0.12, 3.91)   | 1.57<br>(**0.64, 3.70)   | 2.18<br>(**0.01, 5.65)   |
| Simvastatin_low_LR   | -0.68<br>(-1.56, 0.21)     | -0.72<br>(-1.90, 0.45)     | -0.60<br>(-1.27, 0.06)     | -0.62<br>(-1.44, 0.17)     | -0.50<br>(-1.12, 0.09)     | -0.33<br>(-2.58, 1.89) | -0.30<br>(-0.91, 0.31)     | -0.13<br>(-0.77, 0.48)     | 0.05<br>(-2.12, 2.23)  | -                          | 0.21<br>(-2.81, 3.25)  | 0.40<br>(-1.96, 2.76)  | 0.49<br>(-2.62, 3.47)  | 0.42<br>(-1.30, 2.35)  | 0.53<br>(-1.56, 2.62)  | 0.69<br>(-2.24, 3.64)  | 0.61<br>(-1.88, 3.13)  | 0.49<br>(-0.16, 1.12)    | 1.05<br>(-1.80, 3.86)  | **1.45**<br>(0.00, 2.88) | **1.63**<br>(1.06, 2.16) | 2.23<br>(**0.59, 5.03)   |
| Fluvastatin_mod_HR   | -0.89<br>(-3.97, 2.18)     | -0.93<br>(-4.11, 2.23)     | -0.81<br>(-3.85, 2.21)     | -0.83<br>(-3.92, 2.23)     | -0.71<br>(-3.74, 2.29)     | -0.54<br>(-4.22, 3.13) | -0.51<br>(-3.56, 2.51)     | -0.34<br>(-3.37, 2.66)     | -0.16<br>(-3.80, 3.51) | -0.21<br>(-3.25, 2.81)     | -                      | 0.18<br>(-3.56, 3.92)  | 0.29<br>(-3.88, 4.46)  | 0.21<br>(-3.28, 3.70)  | 0.32<br>(-3.30, 3.90)  | 0.49<br>(-3.65, 4.60)  | 0.39<br>(-3.40, 4.24)  | 0.27<br>(-2.75, 3.28)    | 0.83<br>(-3.24, 4.88)  | 1.24<br>(**0.02, 4.49)   | 1.42<br>(**0.17, 4.38)   | 2.02<br>(**0.07, 6.06)   |
| Simvastatin_low_HR   | -1.08<br>(-3.45, 1.36)     | -1.12<br>(-3.66, 1.43)     | -1.00<br>(-3.36, 1.37)     | -1.02<br>(-3.44, 1.42)     | -0.90<br>(-3.25, 1.45)     | -0.73<br>(-3.06, 1.57) | -0.70<br>(-3.07, 1.68)     | -0.53<br>(-2.88, 1.83)     | -0.34<br>(-3.48, 2.79) | -0.40<br>(-2.76, 1.98)     | -0.18<br>(-3.92, 3.56) | -                      | 0.10<br>(-2.66, 2.84)  | 0.02<br>(-1.47, 1.52)  | 0.13<br>(-2.92, 3.22)  | 0.29<br>(-3.35, 3.99)  | 0.22<br>(-1.24, 1.69)  | 0.08<br>(-2.26, 2.45)    | 0.64<br>(-1.94, 3.24)  | 1.05<br>(**0.19, 3.72)   | 1.22<br>(**0.17, 3.55)   | 1.83<br>(**0.01, 5.38)   |
| Pravastatin_mod_HR   | -1.17<br>(-4.20, 1.88)     | -1.21<br>(-4.34, 1.93)     | -1.09<br>(-4.06, 1.90)     | -1.12<br>(-4.15, 1.94)     | -0.99<br>(-3.97, 1.99)     | -0.83<br>(-3.88, 2.26) | -0.80<br>(-3.79, 2.21)     | -0.62<br>(-3.60, 2.37)     | -0.43<br>(-4.07, 3.16) | -0.49<br>(-3.47, 2.52)     | -0.28<br>(-4.46, 3.88) | -0.10<br>(-2.84, 2.66) | -                      | -0.07<br>(-2.37, 2.23) | 0.04<br>(-3.53, 3.62)  | 0.21<br>(-3.88, 4.29)  | 0.12<br>(-2.78, 3.06)  | -0.01<br>(-2.98, 2.99)   | 0.55<br>(-2.78, 3.87)  | 0.96<br>(**0.28, 4.20)   | 1.13<br>(**0.10, 4.09)   | 1.74<br>(**0.29, 5.72)   |
| Atorvastatin_mod_HR  | -1.10<br>(-3.10, 0.90)     | -1.15<br>(-3.28, 1.00)     | -1.02<br>(-2.84, 0.90)     | -1.05<br>(-3.05, 0.95)     | -0.92<br>(-2.83, 0.97)     | -0.75<br>(-2.79, 1.27) | -0.72<br>(-2.66, 1.20)     | -0.56<br>(-2.46, 1.35)     | -0.37<br>(-3.17, 2.43) | -0.42<br>(-2.35, 1.50)     | -0.21<br>(-3.70, 3.28) | -0.02<br>(-1.52, 1.47) | 0.07<br>(-2.23, 2.37)  | -                      | 0.11<br>(-2.62, 2.85)  | 0.27<br>(-3.10, 3.69)  | 0.19<br>(-1.61, 1.99)  | 0.06<br>(-1.84, 1.97)    | 0.62<br>(-1.78, 3.00)  | 1.03<br>(**0.23, 3.29)   | 1.20<br>(**0.64, 3.05)   | 1.81<br>(**0.11, 5.08)   |
| Pravastatin_low_LR   | -1.21<br>(-3.34, 0.93)     | -1.25<br>(-3.53, 1.04)     | -1.13<br>(-3.22, 0.95)     | -1.18<br>(-3.32, 1.00)     | -1.03<br>(-3.10, 1.02)     | -0.86<br>(-3.84, 2.10) | -0.83<br>(-2.93, 1.26)     | -0.66<br>(-2.74, 1.41)     | -0.47<br>(-3.41, 2.44) | -0.53<br>(-2.48, 1.56)     | -0.32<br>(-3.90, 3.30) | -0.13<br>(-3.22, 2.92) | -0.04<br>(-3.62, 3.53) | -0.11<br>(-2.85, 2.62) | -                      | 0.17<br>(-3.36, 3.70)  | 0.09<br>(-3.10, 3.25)  | -0.04<br>(-2.07, 1.98)   | 0.51<br>(-2.94, 3.96)  | 0.93<br>(**0.13, 3.35)   | 1.10<br>(**0.94, 3.12)   | 1.70<br>(**0.12, 5.12)   |
| Pravastatin_low_HR   | -1.37<br>(-4.38, 1.62)     | -1.41<br>(-4.51, 1.87)     | -1.30<br>(-4.24, 1.63)     | -1.32<br>(-4.32, 1.65)     | -1.19<br>(-4.12, 1.72)     | -1.03<br>(-4.61, 2.53) | -1.00<br>(-3.95, 1.95)     | -0.83<br>(-3.76, 2.10)     | -0.64<br>(-4.24, 2.94) | -0.69<br>(-3.64, 2.24)     | -0.49<br>(-4.60, 3.65) | -0.29<br>(-3.99, 3.35) | -0.21<br>(-4.29, 3.88) | -0.27<br>(-3.69, 3.10) | -0.17<br>(-3.70, 3.36) | -                      | -0.07<br>(-3.84, 3.66) | -0.21<br>(-3.15, 2.71)   | 0.34<br>(-3.64, 4.29)  | 0.76<br>(**0.24, 3.93)   | 0.93<br>(**0.19, 3.81)   | 1.53<br>(**0.49, 5.82)   |
| Atorvastatin_low_HR  | -1.29<br>(-3.86, 1.27)     | -1.33<br>(-4.01, 1.32)     | -1.22<br>(-3.72, 1.27)     | -1.24<br>(-3.81, 1.31)     | -1.11<br>(-3.61, 1.36)     | -0.94<br>(-3.29, 1.35) | -0.92<br>(-3.43, 1.58)     | -0.74<br>(-3.24, 1.72)     | -0.55<br>(-3.81, 2.66) | -0.61<br>(-3.13, 1.88)     | -0.39<br>(-4.24, 3.40) | -0.22<br>(-1.69, 1.24) | -0.12<br>(-3.06, 2.78) | -0.19<br>(-1.99, 1.61) | -0.09<br>(-3.25, 3.10) | -                      | 0.07<br>(-3.66, 3.84)  | -0.13<br>(-2.63, 2.35)   | 0.43<br>(-2.11, 2.97)  | 0.84<br>(**0.19, 3.61)   | 1.01<br>(**0.14, 3.44)   | 1.62<br>(**0.05, 5.25)   |
| Pravastatin_low_LR   | **1.16**<br>(-1.91, -0.41) | **1.20**<br>(-2.32, -0.09) | **1.09**<br>(-1.72, -0.47) | **1.11**<br>(-1.99, -0.26) | **0.98**<br>(-1.82, -0.48) | -0.82<br>(-3.04, 1.39) | **0.79**<br>(-1.43, -0.14) | **0.61**<br>(-1.21, -0.05) | -0.43<br>(-2.57, 1.71) | -0.49<br>(-1.12, 0.16)     | -0.27<br>(-3.28, 2.75) | -0.08<br>(-2.45, 2.28) | 0.01<br>(-2.99, 3.98)  | -0.06<br>(-1.97, 1.84) | 0.04<br>(-1.98, 2.07)  | 0.21<br>(-2.71, 3.15)  | 0.13<br>(-2.35, 2.63)  | -                        | 0.56<br>(-2.28, 3.37)  | 0.97<br>(**0.46, 2.37)   | **1.14**<br>(0.65, 1.61) | 1.75<br>(**0.06, 5.84)   |
| Simvastatin_mod_HR   | -1.72<br>(-4.60, 1.18)     | -1.76<br>(-4.74, 1.23)     | -1.64<br>(-4.46, 1.20)     | -1.67<br>(-4.53, 1.23)     | -1.54<br>(-4.35, 1.29)     | -1.37<br>(-3.84, 1.09) | -1.35<br>(-4.17, 1.51)     | -1.17<br>(-3.98, 1.66)     | -0.98<br>(-4.50, 2.50) | -1.05<br>(-3.96, 1.80)     | -0.83<br>(-4.88, 3.24) | -0.64<br>(-3.84, 1.94) | -0.55<br>(-3.07, 2.78) | -0.62<br>(-3.00, 1.78) | -0.51<br>(-3.95, 2.44) | -0.34<br>(-2.97, 2.11) | -0.43<br>(-3.37, 2.28) | -                        | 0.40<br>(**0.66, 3.50) | 0.88<br>(**0.29, 3.38)   | 1.19<br>(**0.19, 5.08)   |                          |
| Fluvastatin_low_LR   | **2.13**<br>(-3.67, -0.57) | **2.17**<br>(-3.48, -0.44) | **2.05**<br>(-3.36, -0.62) | **2.06**<br>(-3.61, -0.53) | **1.95**<br>(-3.36, -0.55) | -1.78<br>(-4.33, 0.74) | **1.76**<br>(-3.20, -0.30) | **1.58**<br>(-2.99, -0.17) | -1.40<br>(-4.91, 1.12) | **1.45**<br>(-2.88, -0.00) | -1.24<br>(-4.49, 2.02) | -1.05<br>(-3.72, 1.59) | -0.96<br>(-4.20, 2.26) | -1.03<br>(-3.29, 1.23) | -0.93<br>(-3.35, 1.53) | -0.76<br>(-3.93, 2.43) | -0.84<br>(-3.61, 1.93) | -0.97<br>(-2.37, 0.46)   | -0.40<br>(-3.50, 2.66) | -                        | 0.17<br>(**0.11, 1.50)   | 0.78<br>(**0.21, 3.83)   |
| Placebo              | **2.31**<br>(-3.05, -1.50) | **2.34**<br>(-3.45, -1.24) | **2.23**<br>(-2.76, -1.68) | **2.25**<br>(-3.02, -1.47) | **2.12**<br>(-2.59, -1.66) | -1.66<br>(-4.13, 0.20) | **1.93**<br>(-2.50, -1.33) | **1.76**<br>(-2.23, -1.28) | -1.57<br>(-3.70, 0.56) | **1.63**<br>(-2.16, -1.06) | -1.42<br>(-4.38, 1.57) | -1.22<br>(-3.55, 1.07) | -1.13<br>(-4.09, 1.80) | -1.20<br>(-3.05, 0.64) | -1.10<br>(-3.12, 0.94) | -0.93<br>(-3.81, 1.97) | -1.01<br>(-3.44, 1.44) | -                        | 0.58<br>(-3.38, 2.19)  | -0.17<br>(**0.50, 1.15)  | -                        | 0.61<br>(**0.16, 3.35)   |
| Fluvastatin_low_HR   | **2.91**<br>(-5.77, -0.03) | 2.95<br>(**0.63, 0.01)     | **2.83**<br>(-5.63, -0.02) | 2.96<br>(**0.70, 0.01)     | -2.73<br>(-5.52, 0.07)     | -2.57<br>(-6.04, 0.96) | -2.54<br>(-5.34, 0.28)     | -2.36<br>(-5.14, 0.44)     | -2.18<br>(-5.65, 1.32) | -2.23<br>(-5.03, 0.59)     | -2.02<br>(-6.06, 2.07) | -1.83<br>(-6.38, 1.73) | -1.74<br>(-6.72, 2.29) | -1.81<br>(-6.09, 1.51) | -1.70<br>(-6.12, 1.72) | -1.53<br>(-6.52, 2.49) | -1.62<br>(-6.25, 2.05) | -1.75<br>(-4.54, 1.06)   | -                      | -1.19<br>(**0.06, 2.70)  | -0.78<br>(**0.63, 2.31)  | -0.61<br>(**0.35, 2.16)  |

**Forest plot of sensitivity analysis after removing high RoB studies**

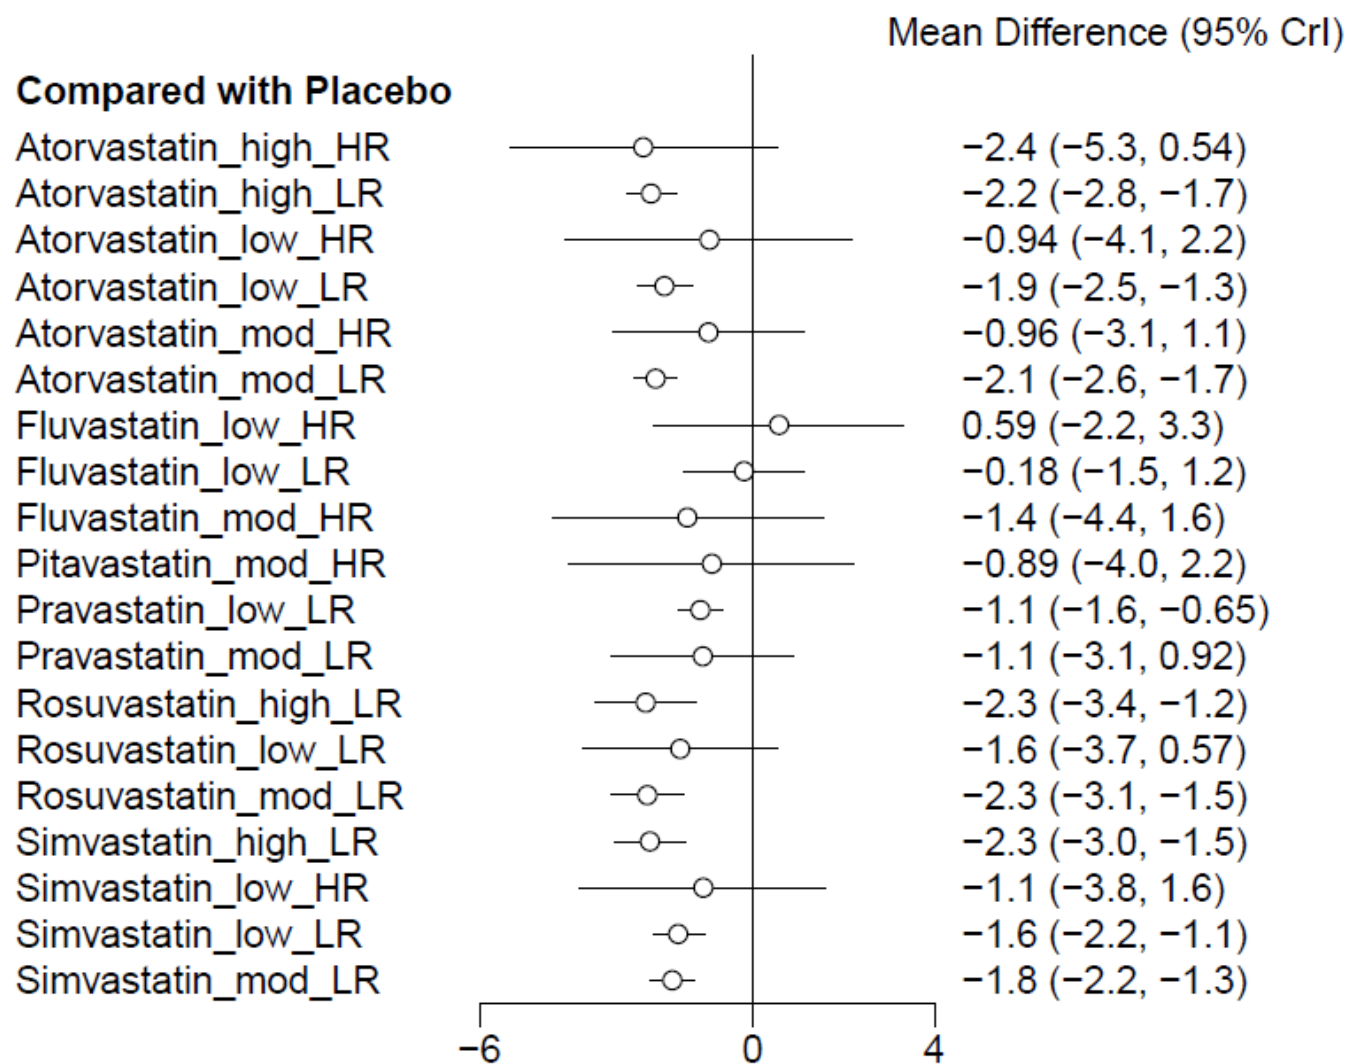

### SUCRA rankings for sensitivity analysis

| Treatment            | SUCRA Score |
|----------------------|-------------|
| Rosuvastatin_mod_LR  | 0.7889692   |
| Rosuvastatin_high_LR | 0.7808058   |
| Atorvastatin_high_LR | 0.7737345   |
| Simvastatin_high_LR  | 0.7678061   |
| Atorvastatin_mod_LR  | 0.7245301   |
| Atorvastatin_high_HR | 0.7040383   |
| Atorvastatin_low_LR  | 0.6257478   |
| Simvastatin_mod_LR   | 0.553373    |
| Rosuvastatin_low_LR  | 0.5279125   |
| Fluvastatin_mod_HR   | 0.4983751   |
| Simvastatin_low_LR   | 0.4967534   |
| Simvastatin_low_HR   | 0.4212047   |
| Pravastatin_mod_LR   | 0.3988972   |
| Atorvastatin_low_HR  | 0.3975071   |
| Pitavastatin_mod_HR  | 0.3863496   |
| Atorvastatin_mod_HR  | 0.3724859   |
| Pravastatin_low_LR   | 0.347588    |
| Fluvastatin_low_LR   | 0.1769425   |
| Placebo              | 0.1299753   |
| Fluvastatin_low_HR   | 0.1270038   |
